# Supplementary material for: New pyridine and chromene scaffolds as potent vasorelaxant and anticancer agents
Source: Royal Society of Chemistry journal article supplement (doi:10.1039/d1ra04758b), 2021-01-01
Supplement: d1ra04758b1.pdf [file d1ra04758b1.pdf]

## New pyridine and chromene scaffolds as potent vasorelaxant and anticancer agents

Dina H. Dawood<sup>a</sup>, Aladdin M. Srour<sup>b,\*</sup>, Dalia O. Saleh<sup>c</sup>, Kelley J. Huff<sup>d</sup>, Francesca Greco<sup>d</sup>, Helen M. I. Osborn<sup>d</sup>

<sup>a</sup> *Chemistry of Natural and Microbial Products Department, Pharmaceutical and Drug Industries Research Division, National Research Centre, 33 El Bohouth St., Dokki, Giza 12622, Egypt*

<sup>b</sup> *Department of Therapeutic Chemistry, National Research Centre, 33 El Bohouth St., Dokki, Giza 12622, Egypt*

<sup>c</sup> *Pharmacology Department, National Research Centre, 33 El Bohouth St., Dokki, Giza 12622, Egypt*

<sup>d</sup> *School of Pharmacy, University of Reading, Whiteknights, Reading, RG6 6AD, UK*

### Supplementary material

#### 1. Vasodilation Activity Screening

#### 2. Cell Culture Methods

**Table S1.** Dose response curves the tested compounds **3a-o** and **4a-e**.

**Fig. 1:** MTT is reduced by NADPH to form purple formazan crystals

**Fig. 2.** IC<sub>50</sub> curves of compounds **3d**, **3g**, **3h** and **3i** on MCF-7 cell line

**Fig. 3.** IC<sub>50</sub> curves of compounds **3d**, **3g** and **3i** on MDA-MB 231 cell line

#### Spectroscopic chart captions

**Fig. S1.** IR spectrum of compound **3a** (KBr pellet).

**Fig. S2.** <sup>1</sup>H-NMR spectrum of compound **3a**.

**Fig. S3.** <sup>13</sup>C-NMR spectrum of compound **3a**.

**Fig. S4.** Mass spectrum of compound **3a**.

**Fig. S5.** IR spectrum of compound **3b** (KBr pellet).

**Fig. S6.** <sup>1</sup>H-NMR spectrum of compound **3b**.

**Fig. S7.** <sup>13</sup>C-NMR spectrum of compound **3b**.

**Fig. S8.** Mass spectrum of compound **3b**.

**Fig. S9.** IR spectrum of compound **3c** (KBr pellet).

**Fig. S10.**  $^1\text{H}$ -NMR spectrum of compound **3c**.  
**Fig. S11.**  $^{13}\text{C}$ -NMR spectrum of compound **3c**.  
**Fig. S12.** Mass spectrum of compound **3c**.  
**Fig. S13.** IR spectrum of compound **3d** (KBr pellet).  
**Fig. S14.**  $^1\text{H}$ -NMR spectrum of compound **3d**.  
**Fig. S15.**  $^{13}\text{C}$ -NMR spectrum of compound **3d**.  
**Fig. S16.** Mass spectrum of compound **3d**.  
**Fig. S17.** IR spectrum of compound **3e** (KBr pellet).  
**Fig. S18.**  $^1\text{H}$ -NMR spectrum of compound **3e**.  
**Fig. S19.**  $^{13}\text{C}$ -NMR spectrum of compound **3e**.  
**Fig. S20.** Mass spectrum of compound **3e**.  
**Fig. S21.** IR spectrum of compound **3f** (KBr pellet).  
**Fig. S22.**  $^1\text{H}$ -NMR spectrum of compound **3f**.  
**Fig. S23.**  $^{13}\text{C}$ -NMR spectrum of compound **3f**.  
**Fig. S24.** Mass spectrum of compound **3f**.  
**Fig. S25.** IR spectrum of compound **3g** (KBr pellet).  
**Fig. S26.**  $^1\text{H}$ -NMR spectrum of compound **3g**.  
**Fig. S27.**  $^{13}\text{C}$ -NMR spectrum of compound **3g**.  
**Fig. S28.** Mass spectrum of compound **3g**.  
**Fig. S29.** IR spectrum of compound **3h** (KBr pellet).  
**Fig. S30.**  $^1\text{H}$ -NMR spectrum of compound **3h**.  
**Fig. S31.**  $^{13}\text{C}$ -NMR spectrum of compound **3h**.  
**Fig. S32.** Mass spectrum of compound **3h**.  
**Fig. S33.** IR spectrum of compound **3i** (KBr pellet).  
**Fig. S34.**  $^1\text{H}$ -NMR spectrum of compound **3i**.  
**Fig. S35.**  $^{13}\text{C}$ -NMR spectrum of compound **3i**.  
**Fig. S36.** Mass spectrum of compound **3i**.  
**Fig. S37.** IR spectrum of compound **3j** (KBr pellet).  
**Fig. S38.**  $^1\text{H}$ -NMR spectrum of compound **3j**.  
**Fig. S39.**  $^{13}\text{C}$ -NMR spectrum of compound **3j**.  
**Fig. S40.** Mass spectrum of compound **3j**.

**Fig. S41.** IR spectrum of compound **3k** (KBr pellet).  
**Fig. S42.** <sup>1</sup>H-NMR spectrum of compound **3k**.  
**Fig. S43.** <sup>13</sup>C-NMR spectrum of compound **3k**.  
**Fig. S44.** Mass spectrum of compound **3k**.  
**Fig. S45.** IR spectrum of compound **3l** (KBr pellet).  
**Fig. S46.** <sup>1</sup>H-NMR spectrum of compound **3l**.  
**Fig. S47.** <sup>13</sup>C-NMR spectrum of compound **3l**.  
**Fig. S48.** Mass spectrum of compound **3l**.  
**Fig. S49.** IR spectrum of compound **3m** (KBr pellet).  
**Fig. S50.** <sup>1</sup>H-NMR spectrum of compound **3m**.  
**Fig. S51.** <sup>13</sup>C-NMR spectrum of compound **3m**.  
**Fig. S52.** Mass spectrum of compound **3m**.  
**Fig. S53.** IR spectrum of compound **3n** (KBr pellet).  
**Fig. S54.** <sup>1</sup>H-NMR spectrum of compound **3n**.  
**Fig. S55.** <sup>13</sup>C-NMR spectrum of compound **3n**.  
**Fig. S56.** Mass spectrum of compound **3n**.  
**Fig. S57.** IR spectrum of compound **3o** (KBr pellet).  
**Fig. S58.** <sup>1</sup>H-NMR spectrum of compound **3o**.  
**Fig. S59.** <sup>13</sup>C-NMR spectrum of compound **3o**.  
**Fig. S60.** Mass spectrum of compound **3o**.  
**Fig. S61.** IR spectrum of compound **4a** (KBr pellet).  
**Fig. S62.** <sup>1</sup>H-NMR spectrum of compound **4a**.  
**Fig. S63.** <sup>13</sup>C-NMR spectrum of compound **4a**.  
**Fig. S64.** Mass spectrum of compound **4a**.  
**Fig. S65.** IR spectrum of compound **4b** (KBr pellet).  
**Fig. S66.** <sup>1</sup>H-NMR spectrum of compound **4b**.  
**Fig. S67.** <sup>13</sup>C-NMR spectrum of compound **4b**.  
**Fig. S68.** Mass spectrum of compound **4b**.  
**Fig. S69.** IR spectrum of compound **4c** (KBr pellet).  
**Fig. S70.** <sup>1</sup>H-NMR spectrum of compound **4c**.  
**Fig. S71.** <sup>13</sup>C-NMR spectrum of compound **4c**.

**Fig. S72.** Mass spectrum of compound **4c**.

**Fig. S73.** IR spectrum of compound **4d** (KBr pellet).

**Fig. S74.** <sup>1</sup>H-NMR spectrum of compound **4d**.

**Fig. S75.** <sup>13</sup>C-NMR spectrum of compound **4d**.

**Fig. S76.** Mass spectrum of compound **4d**.

**Fig. S77.** IR spectrum of compound **4e** (KBr pellet).

**Fig. S78.** <sup>1</sup>H-NMR spectrum of compound **4e**.

**Fig. S79.** <sup>13</sup>C-NMR spectrum of compound **4e**.

## **1. Vasodilation Activity Screening**

The vasodilation activity screening was undertaken by Pharmacology Department, National Research Centre, Egypt, according to the standard in vitro bioassay technique [1-4] by testing the effects of the synthesized agents **3a-o** and **4a-e** and compared with prazosin hydrochloride ( $\alpha$ 1-AR antagonist) on isolated thoracic aortic rings of male Wistar rats (200–250 g) pre-contracted with norepinephrine hydrochloride. After light ether anesthesia, the rats were sacrificed by cervical dislocation. The aortae were immediately excised, freed of extraneous tissues, and prepared for isometric tension recording. Aorta was cut into (3-5 mm width) rings and each ring was placed in a vertical chamber “10 ml 5 jacketed automatic multi-chamber organ bath system (Model no. ML870B6/C, Panlab, Spain)” filled with Krebs solution composed of (in mM): NaCl, 118.0; KCl, 4.7; NaHCO<sub>3</sub>, 25.0; CaCl<sub>2</sub>, 1.8; NaH<sub>2</sub>PO<sub>4</sub>, 1.2; MgSO<sub>4</sub>, 1.2; glucose, 11.0 and oxygenated with carbogen gas (95% O<sub>2</sub>/5% CO<sub>2</sub>) at 37 ± 0.5 °C. Each aortic ring was mounted between two stainless steel hooks passed through its lumen. The lower hook was fixed between two plates, while the upper one was attached to a force displacement transducer (Model no. MLT0201, Panlab, Spain) connected to an amplifier (PowerLab, AD Instruments Pty. Ltd.), which was connected to a computer. The Chart for windows (v 3.4) software was used to record and elaborate data. Preparations were stabilized under 2 g resting tension during 2 h, and then the contracture response to norepinephrine hydrochloride (10<sup>-6</sup> M) was measured before and after exposure to increasing concentrations of the tested synthesized compounds (50, 100, 150, 200, 250, 300, 350, 400, 450 and 500 μM). The tested compounds were dissolved in dimethyl sulfoxide

(DMSO) as stock solution (10 ml of 0.005 M). Control experiments were performed in the presence of DMSO alone, at the same concentrations as those used with the derivatives tested, which demonstrated that the solvent did not affect the contractile response of isolated aorta. The observed vasodilation activity screening data for the synthesized compounds **3a-o** and **4a-e** and prazosin hydrochloride are expressed as IC<sub>50</sub> ( $\mu$ M) concentration necessary for 50% reduction of maximal norepinephrine hydrochloride induced contracture utilizing four different replicates.

## ***2. Cell Culture Methods***

### ***Cell culturing***

The MCF-7 cells were cultured in RPMI with 5% FBS. The MDA-MB 231 cells was cultured in DMEM (with L-glutamine) with 10% FBS. All of the cells were stored in an incubator at 37 °C with 5% CO<sub>2</sub>.

The cells were subcultured at 80-90 % confluency. For MCF-7 and MDA-MB 231, the old medium was removed and discarded, and the flask was washed with 5 ml, phosphate buffer solution (PBS). 1 mL of trypsin was then added to the flask and allowed to incubate for 3 min before 4 mL of complete medium was added to deactivate the trypsin. The solution was then removed from the flask and put into a falcon tube and the cells were separated from the medium by centrifuging at 215 x g for 5 min. The old medium was removed and discarded, and fresh medium was added and the cells suspended, and new flasks were seeded at 1:10 cells to complete medium.

### ***Cell counting***

To count the cells, the same procedure for detaching cells as subculturing was used. After the cells were resuspended in fresh medium, a 100  $\mu$ L aliquot was added to 100  $\mu$ L of Trypan blue (TB) solution. The cells were then counted using a haemocytometer. The haemocytometer has a neubauer chamber, which contains two sets of 9 squares in a grid. Using the haemocytometer, 5 squares from each set were counted and all 10 squares averaged, and the concentration of cells in the solution was calculated using the following equation:

$$\text{Concentration (cells/mL)} = 2 \times \text{Cells/square average} \times 10^4$$

In this equation, 2 is the dilution factor from the addition of the TB solution and  $10^4$  is the converted value of the volume each square contains. Using the concentration of cells that was determined, an aliquot of the cell suspension was diluted with fresh medium to the desired density for seeding a 96 well plate. Plates were seeded 24 hours before they were treated with the test compounds.

### **Phosphate Buffer Saline Preparation**

Phosphate buffer saline (PBS) was prepared by adding 4.4 g NaCl, 7.5 g  $\text{Na}_2\text{HPO}_4$ , and 2.1 g  $\text{Na}_2\text{HPO}_4$  to a 1 L media bottle containing approximately 750 mL deionized water and stirred until completely dissolved. The pH was checked to confirm it was 7.4, and then the volume was brought up to 1 L with deionized water. The buffer was then decanted into smaller bottles before autoclaving.

### **Test compounds stock solutions**

The compounds were provided in powdered form, and to assess the compounds' activities against various cell lines, stock solutions were prepared by dissolving them in DMSO to a concentration of 4 mM. The stock solutions were stored in the freezer at  $-20\text{ }^\circ\text{C}$ .

### **MTT cell viability assay**

Cytotoxicity of the compounds was tested using the MTT assay. MTT (3-(4,5-dimethylthiazol2-yl)-2,5-diphenyltetrazolium bromide) is a salt that is enzymatically reduced by live cells, resulting in the formation of formazan crystals which can then be read by a spectrophotometer.

To test the compounds against MCF-7 and NIDA-MB 231 cells, solutions were prepared from the 4 mM stock solutions. They were diluted to  $20\text{ }\mu\text{M}$  in complete medium to contain 1% DMSO. MCF-7 and MDA-MB 231 were screened against all compounds at a concentration of  $10\text{ }\mu\text{M}$  by adding  $100\text{ }\mu\text{L}$  of the diluted solution to each well. The four compounds that exhibited the highest cytotoxic effect were selected to find the  $\text{IC}_{50}$  for each of the cancer cell lines in the MCF-7 and MDA-MB 231 experiments were selected. Each experiment was replicated three times, and the results were expressed as the mean  $\pm$  the standard error of the mean.

After the initial screening, the selected compounds were again plated and screened at concentrations ranging from  $0.01\text{ }\mu\text{M}$  to  $20\text{ }\mu\text{M}$ , and the MTT assay was carried out

again. Each experiment was replicated three times, and the results were expressed as the mean  $\pm$  the standard error of the mean. The results were plotted in graph pad in order to determine the IC<sub>50</sub> values.

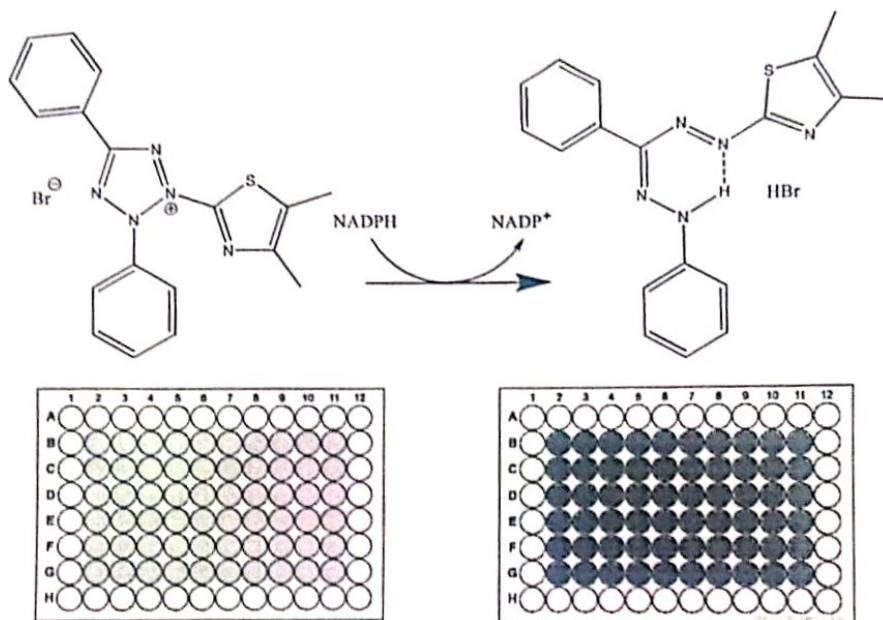

**Fig. 1:** MTT is reduced by NADPH to form purple formazan crystals

An MTT solution was prepared by dissolving MTT in PBS at a concentration of 5 mg/mL. 20  $\mu$ L of the solution was added to each of the wells treated with a compound, as well as to the control, and allowed to incubate for 5 h. After 5 h, the media in the wells was removed and the formazan crystals were dissolved in 100  $\mu$ L of DMSO. The plate was then incubated for 30 min to allow the formazan crystals to dissolve, and the plate was read on a spectrophotometer at 570 nm, with a reference wavelength of 450 nm. Each experiment was replicated three times, and the results were expressed as the mean  $\pm$  the standard error of the mean.

**Table S1.** Dose response curves the tested compounds **3a-o** and **4a-e**.

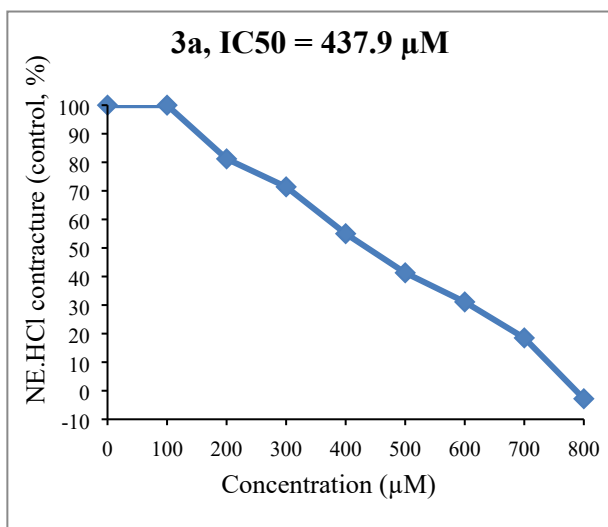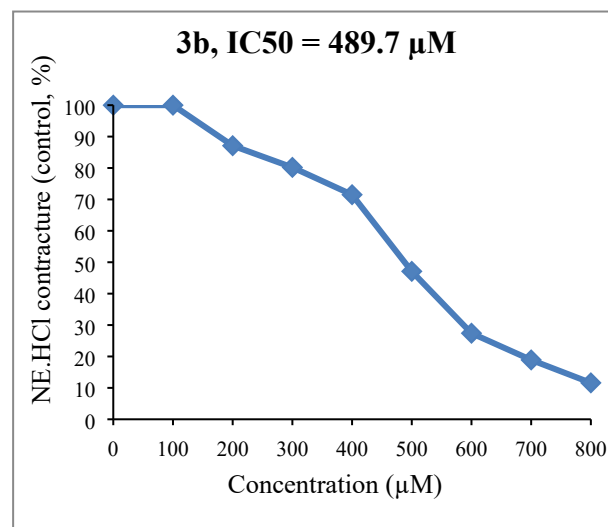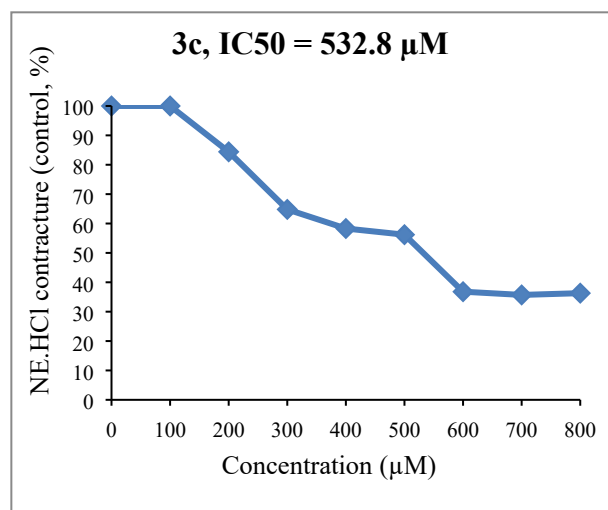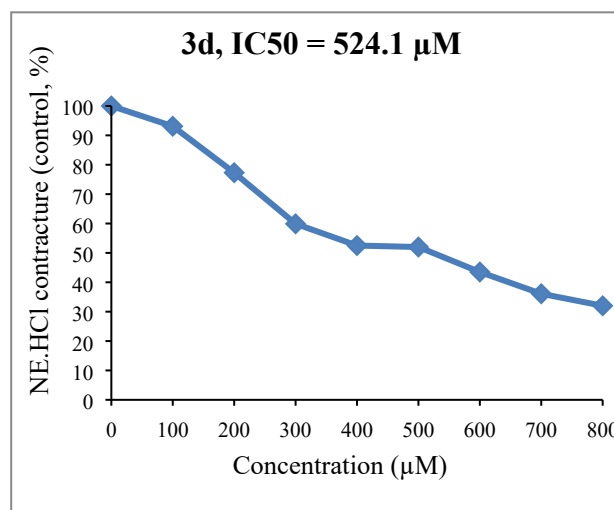



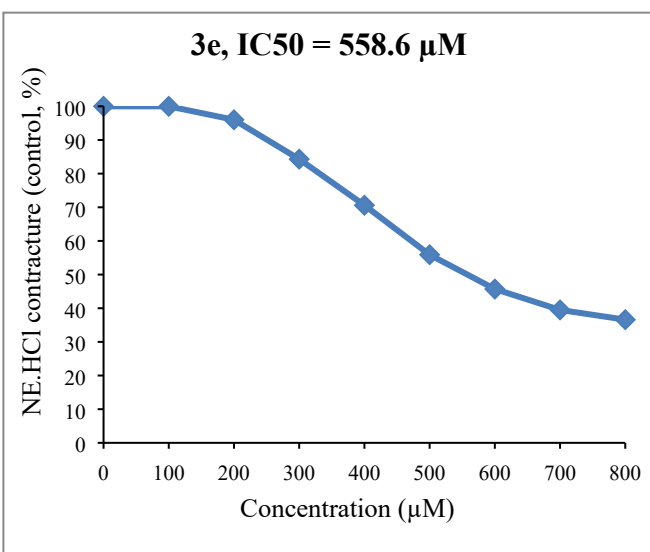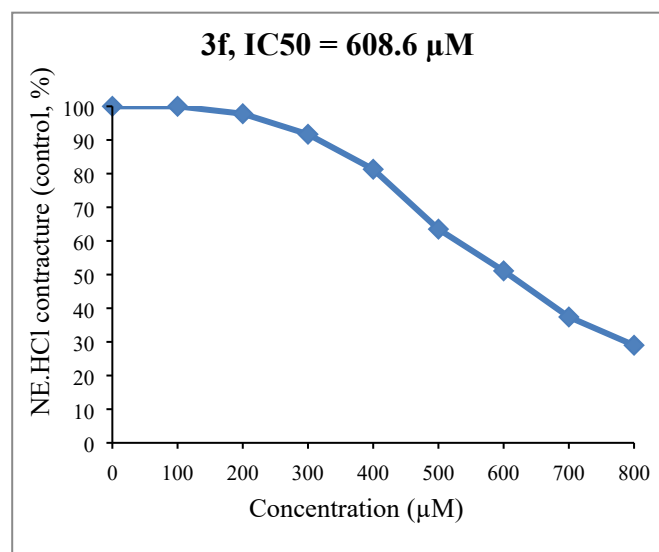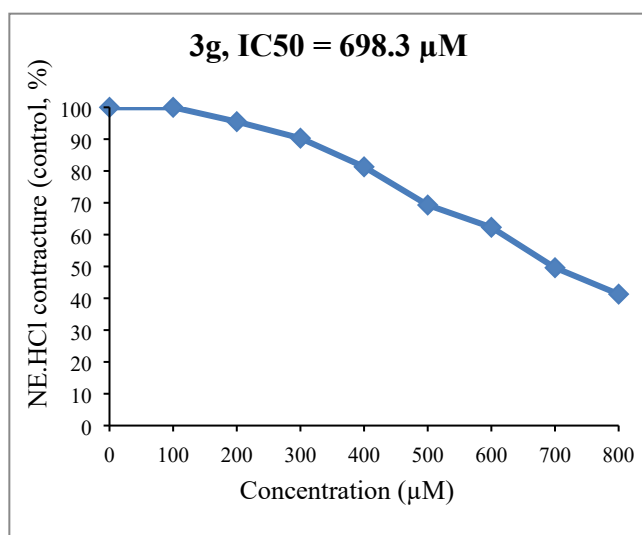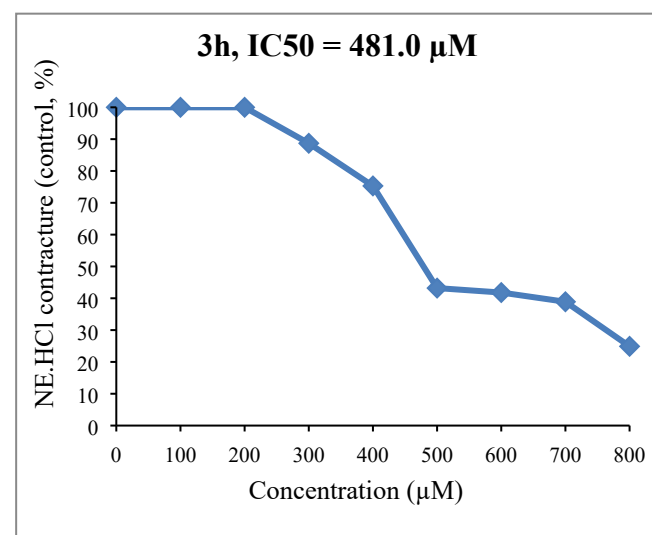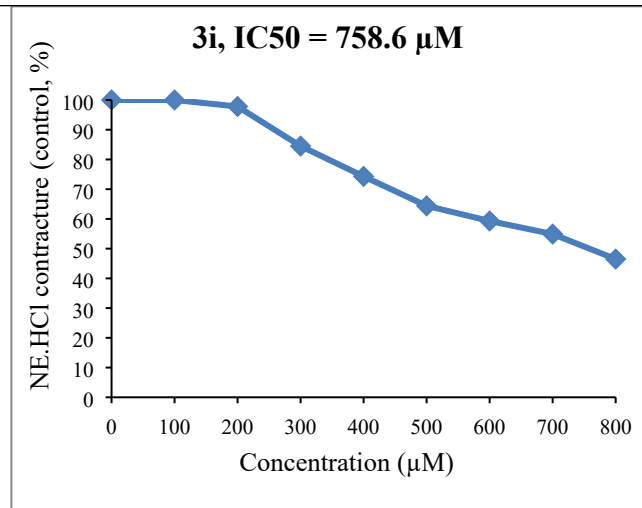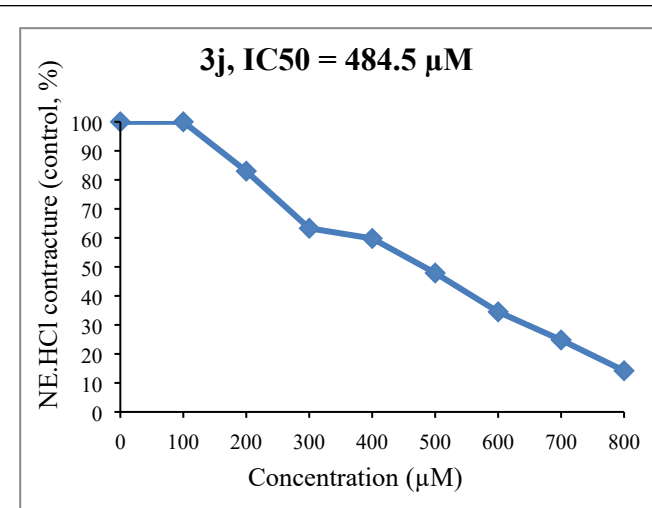

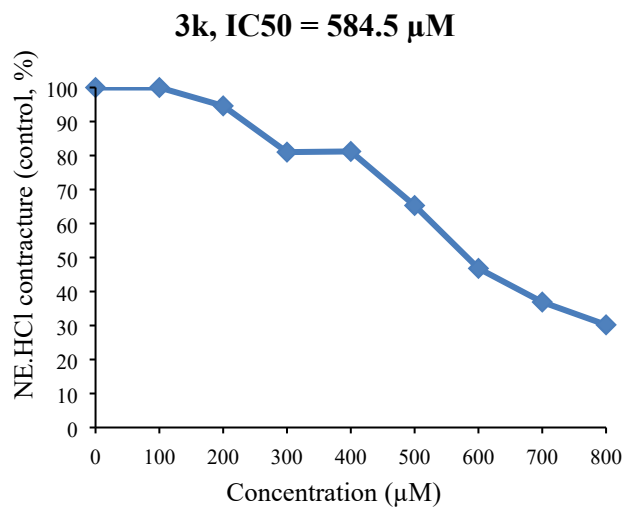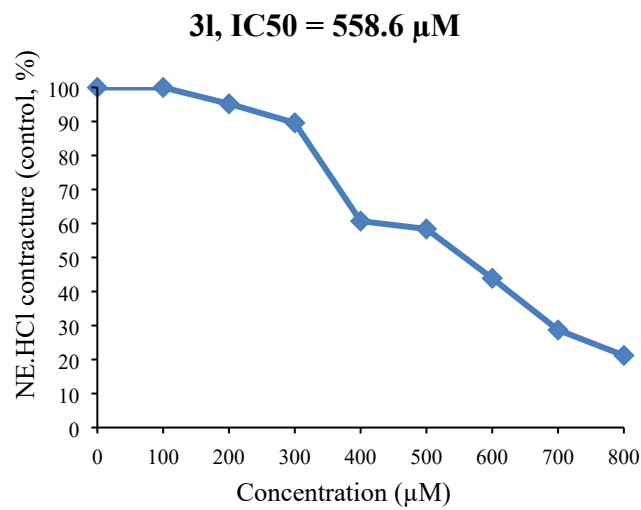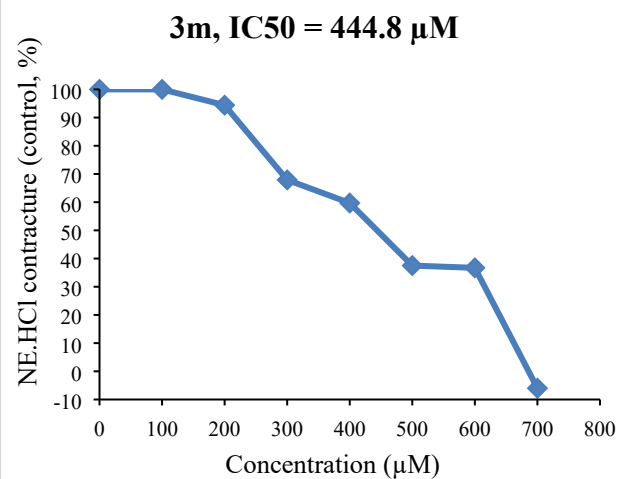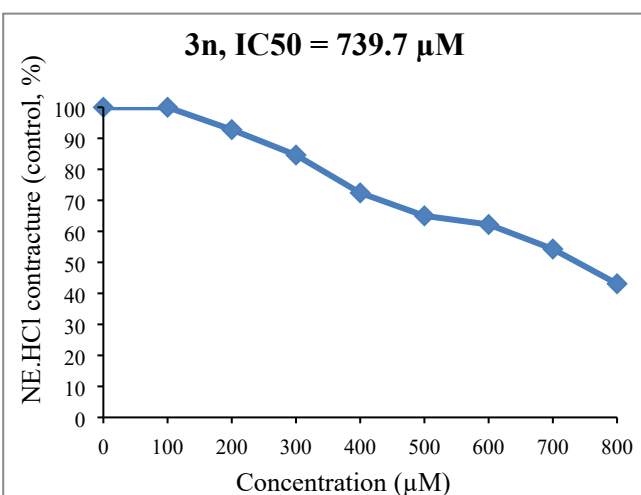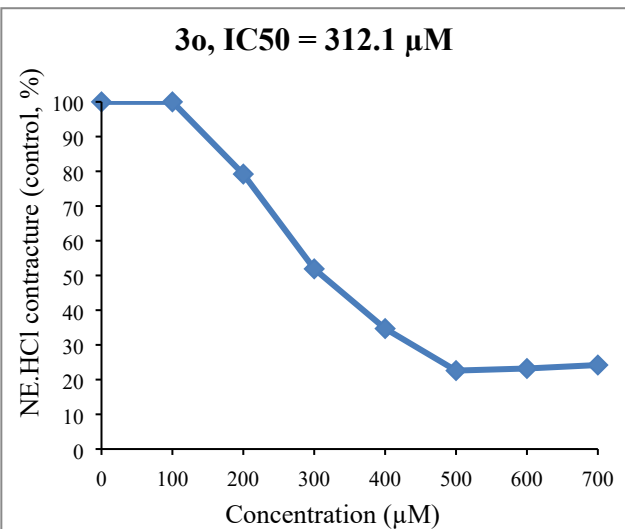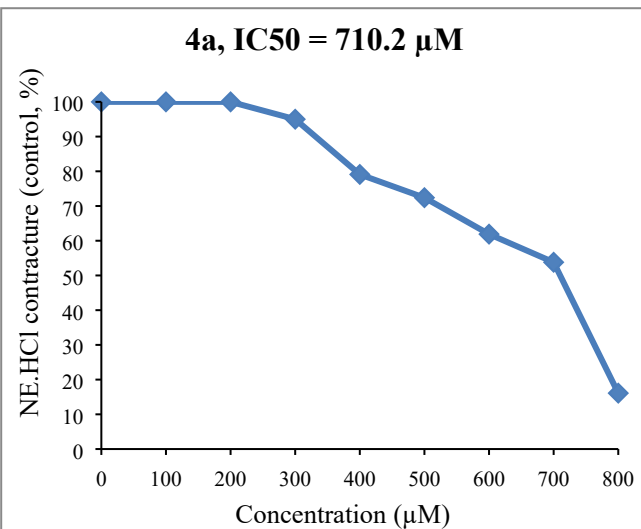

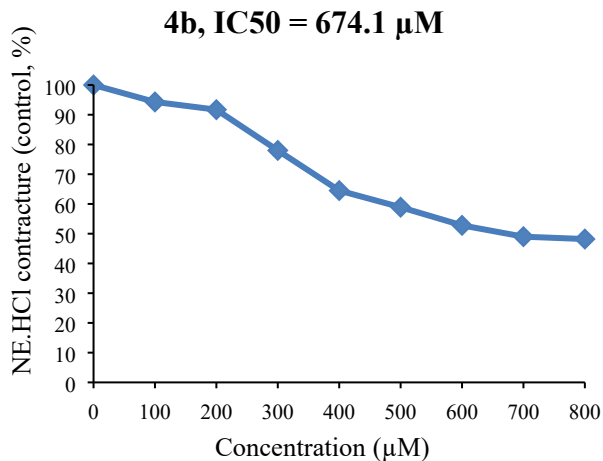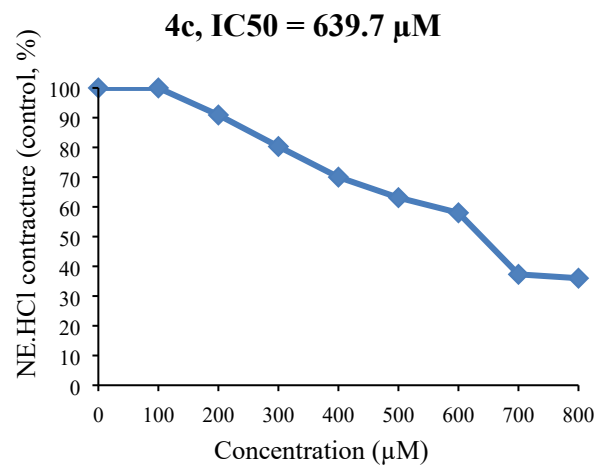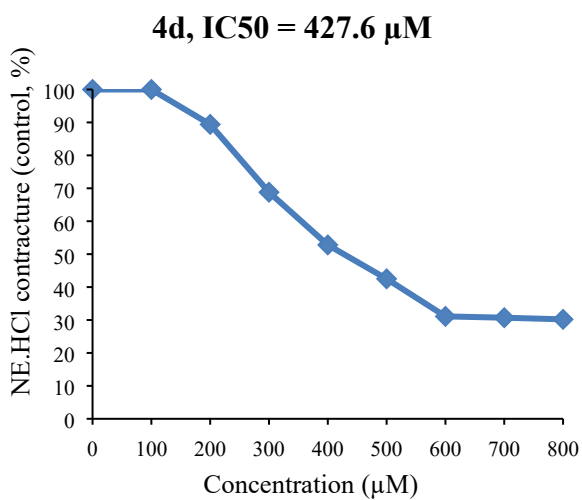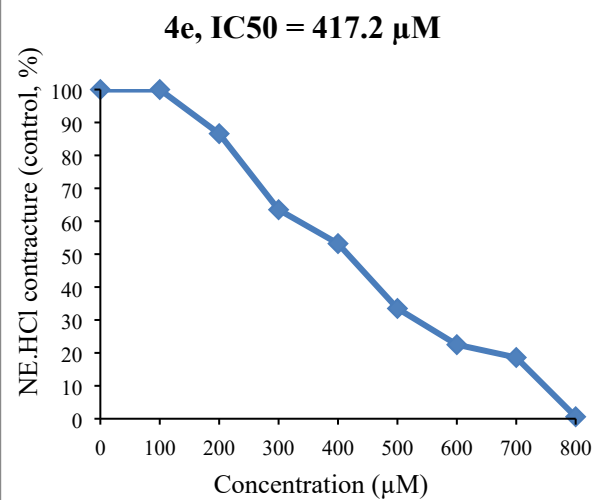

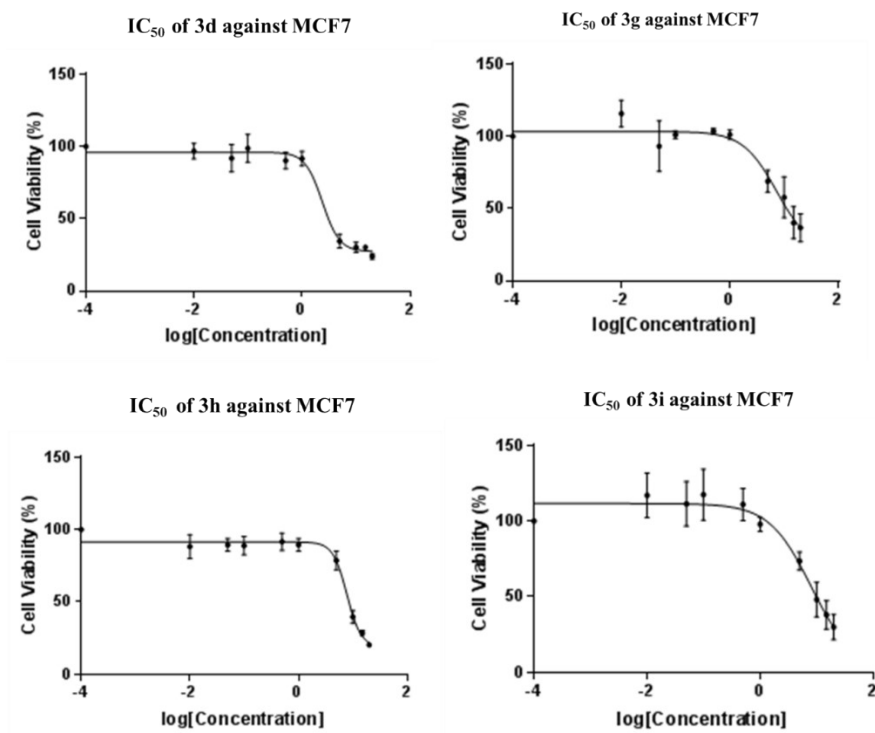

**Fig. 2.**  $IC_{50}$  curves of compounds **3d**, **3g**, **3h** and **3i** on MCF-7 cell line

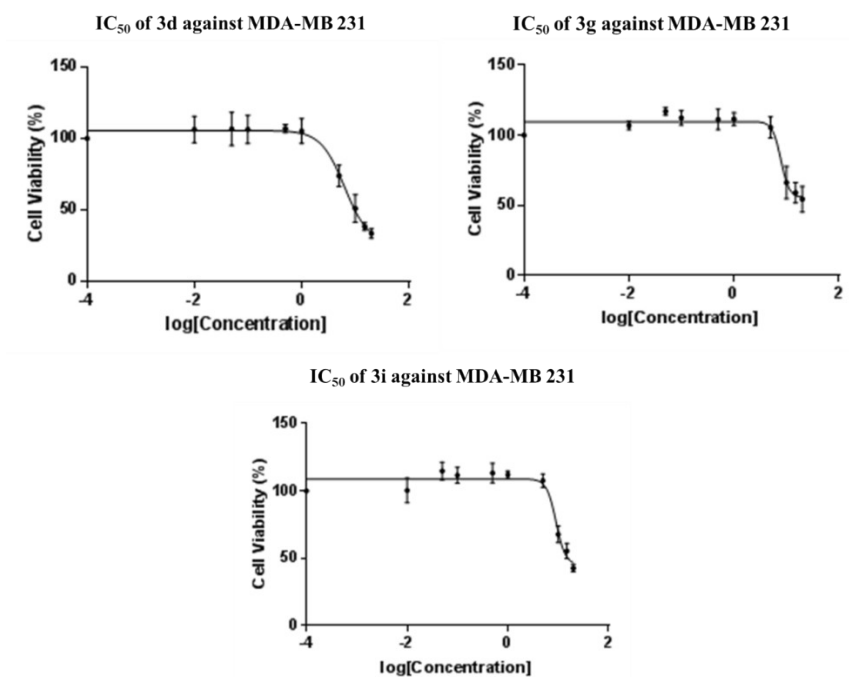

**Fig. 3.**  $IC_{50}$  curves of compounds **3d**, **3g** and **3i** on MDA-MB 231 cell line

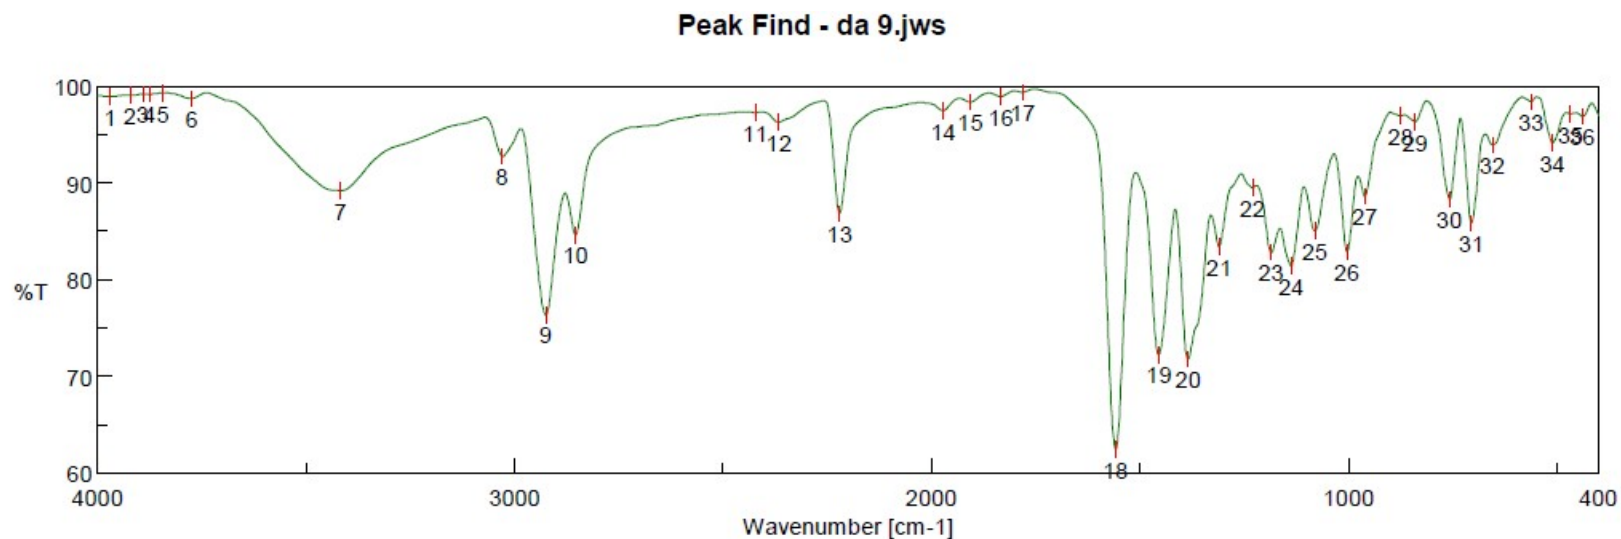

[ Result of Peak Picking ]

| No. | Position | Intensity |
|-----|----------|-----------|-----|----------|-----------|-----|----------|-----------|-----|----------|-----------|
| 1   | 3969.75  | 98.9253   | 2   | 3922.5   | 99.0548   | 3   | 3890.68  | 99.1379   | 4   | 3874.29  | 99.1263   |
| 5   | 3842.47  | 99.2688   | 6   | 3774.01  | 98.6978   | 7   | 3417.24  | 89.1819   | 8   | 3028.66  | 92.7156   |
| 9   | 2925.48  | 76.3217   | 10  | 2854.13  | 84.5752   | 11  | 2423.12  | 97.2736   | 12  | 2366.23  | 96.2709   |
| 13  | 2220.63  | 86.8103   | 14  | 1971.86  | 97.453    | 15  | 1906.29  | 98.3406   | 16  | 1833.97  | 98.8997   |
| 17  | 1781.9   | 99.359    | 18  | 1558.2   | 62.4467   | 19  | 1455.03  | 72.2026   | 20  | 1384.64  | 71.7551   |
| 21  | 1310.39  | 83.3971   | 22  | 1230.36  | 89.4741   | 23  | 1185.04  | 82.7703   | 24  | 1136.83  | 81.3836   |
| 25  | 1080.91  | 85.0524   | 26  | 1003.77  | 82.8602   | 27  | 960.377  | 88.5958   | 28  | 875.524  | 96.9262   |
| 29  | 839.847  | 96.2915   | 30  | 756.923  | 88.2719   | 31  | 704.855  | 85.8251   | 32  | 654.715  | 93.9258   |
| 33  | 562.148  | 98.3853   | 34  | 511.044  | 94.1183   | 35  | 467.653  | 97.1015   | 36  | 438.726  | 96.859    |

**Fig. S1.** IR spectrum of compound **3a** (KBr pellet).

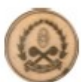

Dr\_ZaneebNovel-9

Dr\_ZaneebNovel-9

Sample Name **Dr\_ZaneebNovel-9**  
Date collected **2017-04-27**

Pulse sequence **PROTON**  
Solvent **cdcl3**

Temperature **25**  
Spectrometer **nmr400-mercury400**

Study owner **vnmr1**  
Operator **vnmr1**

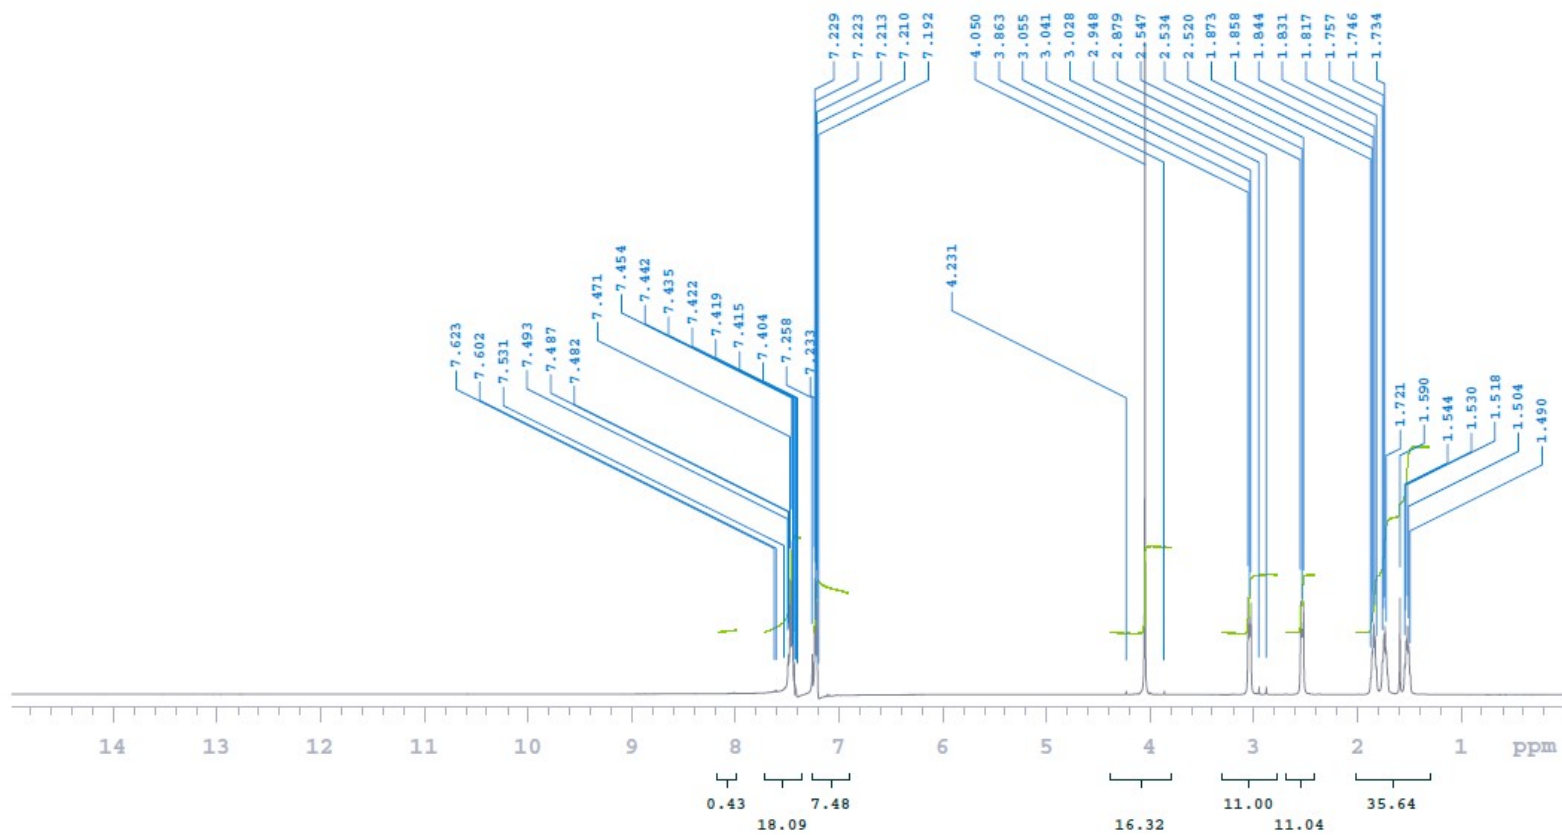

**Fig. S2.**  $^1\text{H-NMR}$  spectrum of compound **3a**.

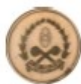

Dr\_ZaneebNovel-DA9

Dr\_ZaneebNovel-DA9

Sample Name Dr\_ZaneebNovel-DA9  
Date collected 2017-07-27

Pulse sequence CARBON  
Solvent cdcl3

Temperature 25  
Spectrometer nmr400-mercury400

Study owner vnmr1  
Operator vnmr1

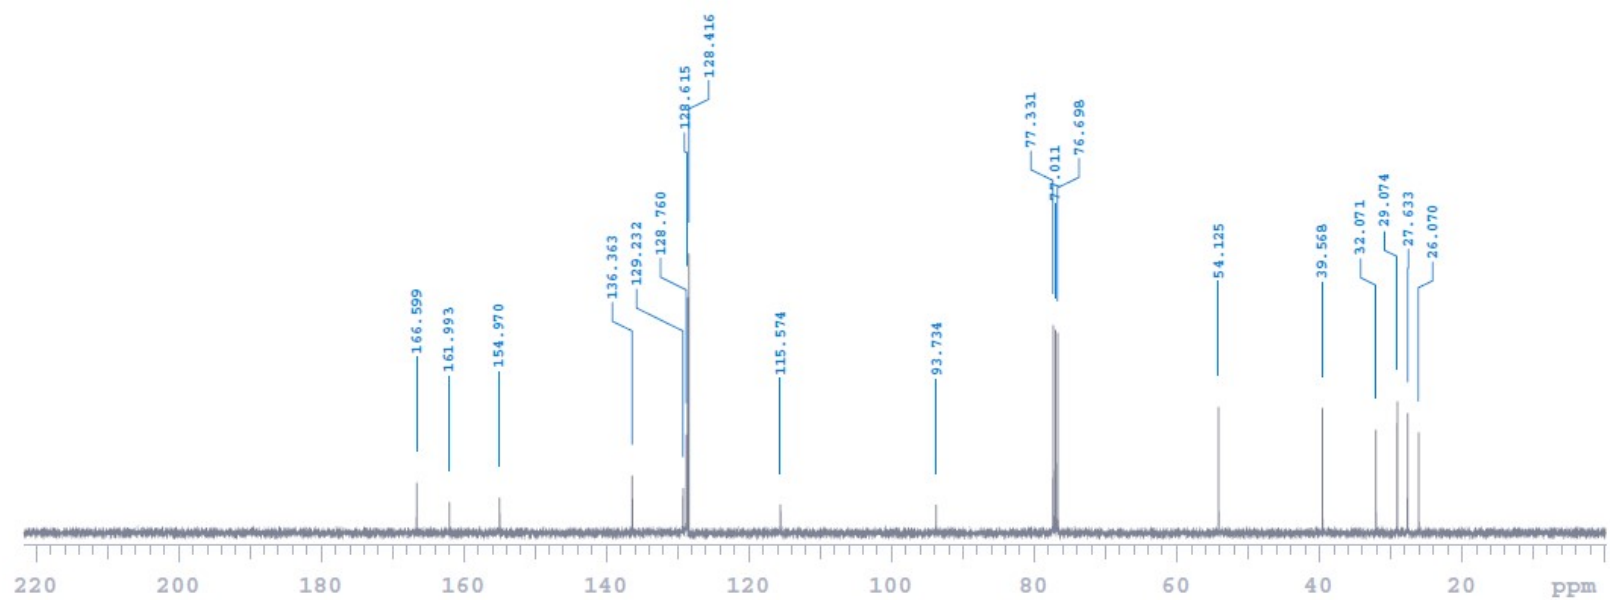

Fig. S3. <sup>13</sup>C-NMR spectrum of compound 3a.

Alaa-AD9 #595 RT: 2.05 AV: 1 NL: 8.72E6

T: {0,0} + c EI Full ms [50.00-500.00]

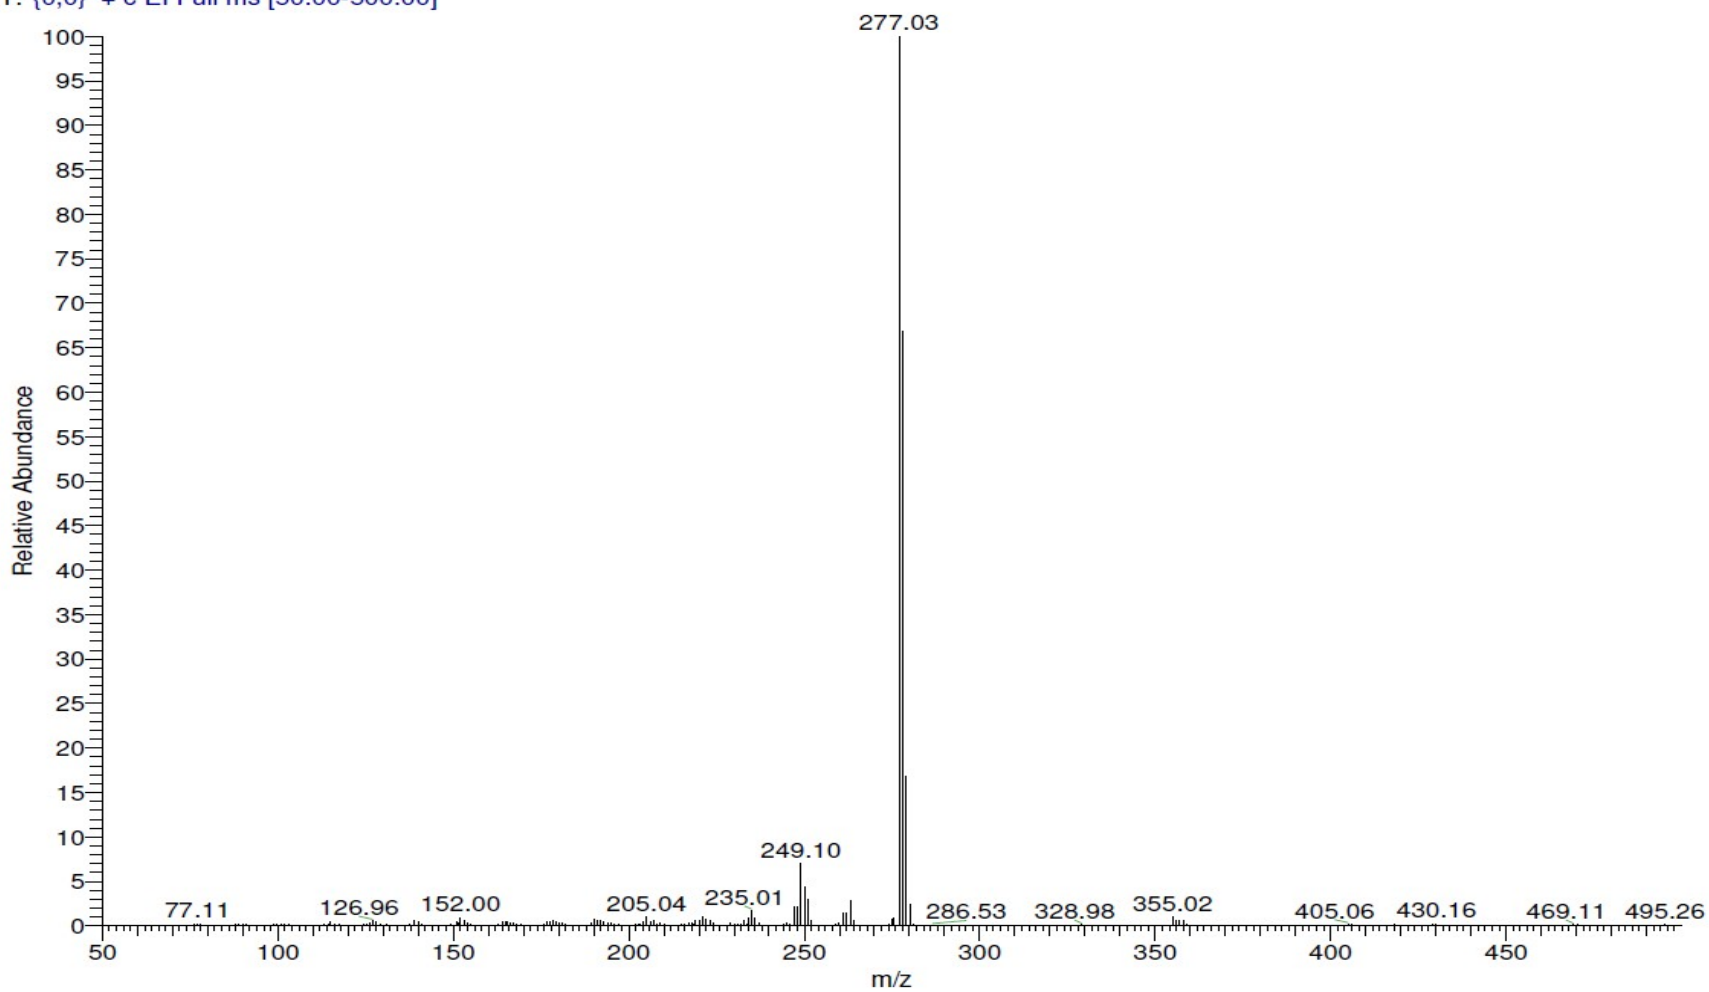

Fig. S4. Mass spectrum of compound 3a.



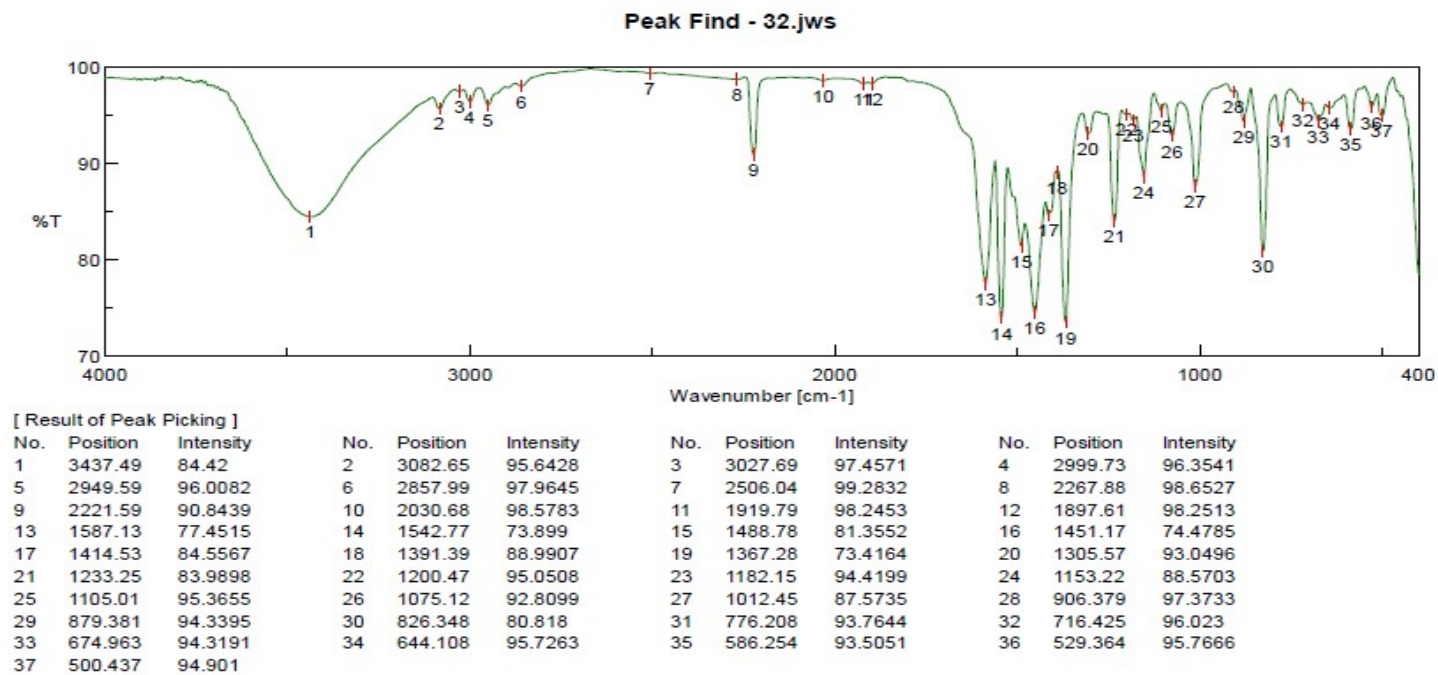

**Fig. S5.** IR spectrum of compound **3b** (KBr pellet).

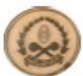

Dr\_ZaneebNovel-17

Dr\_ZaneebNovel-17

Sample Name Dr\_ZaneebNovel-17  
Date collected 2017-04-27

Pulse sequence PROTON  
Solvent cdcl3

Temperature 25  
Spectrometer nmr400-mercury400

Study owner vnmr1  
Operator vnmr1

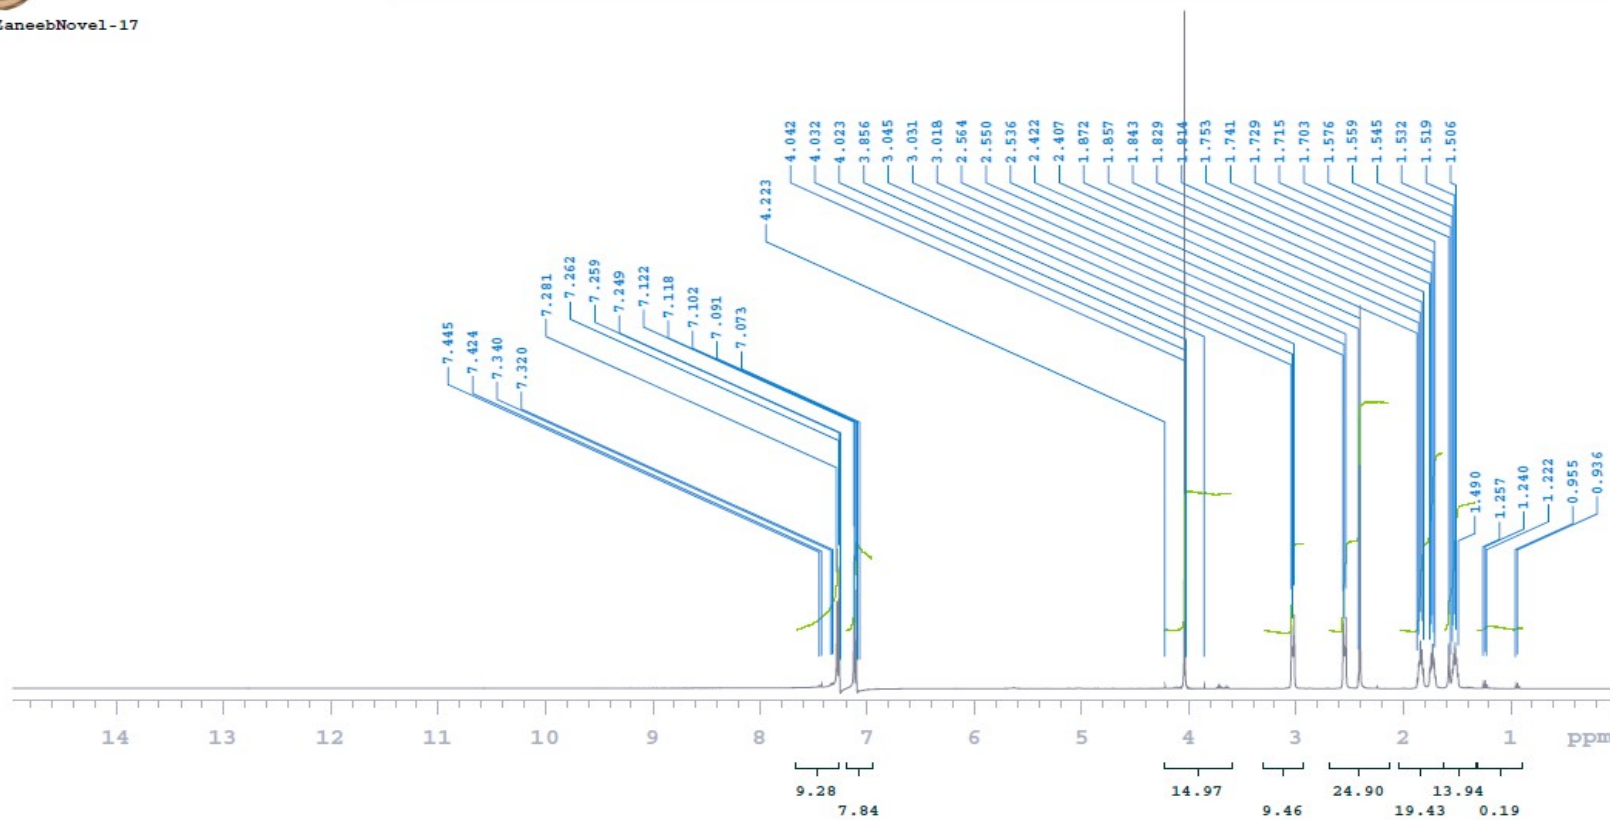

Fig. S6. <sup>1</sup>H-NMR spectrum of compound **3b**.

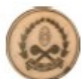

Dr\_ZaneebNovel-DA17

Dr\_ZaneebNovel-DA17

Sample Name Dr\_ZaneebNovel-DA17  
Date collected 2017-07-30

Pulse sequence CARBON  
Solvent cdcl3

Temperature 25  
Spectrometer nmr400-mercury400

Study owner vnmr1  
Operator vnmr1

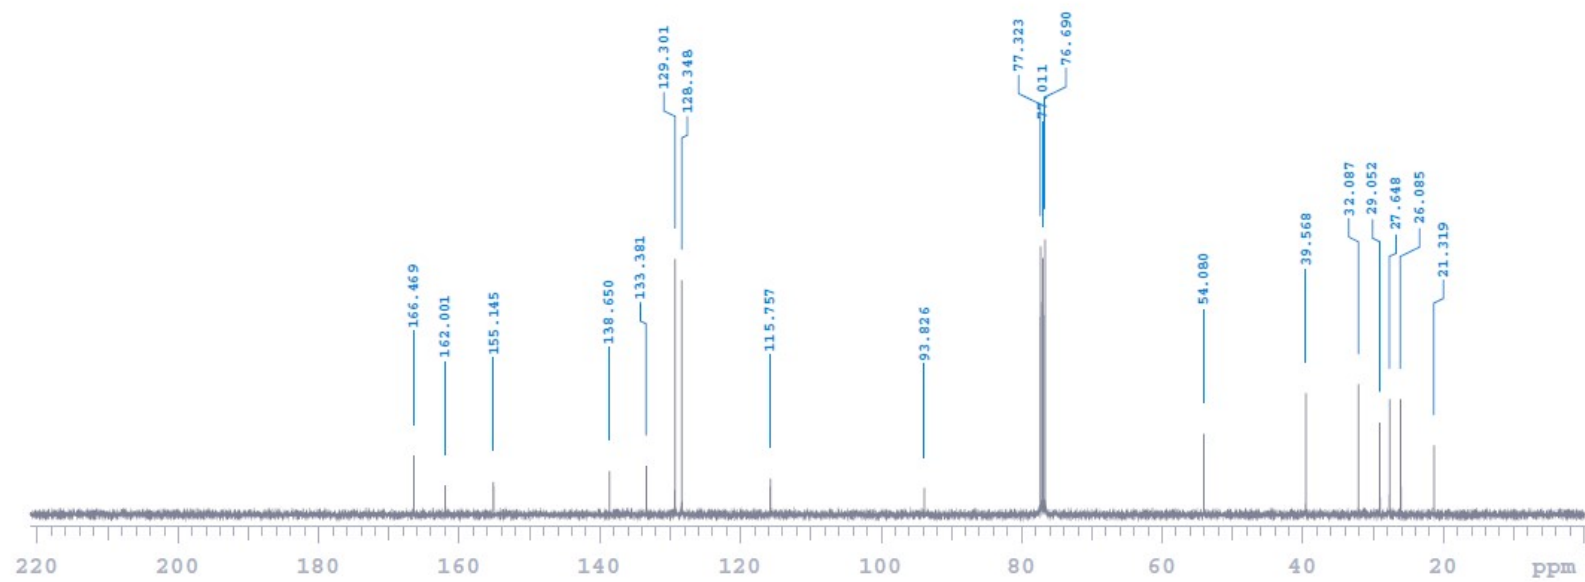

Fig. S7.  $^{13}\text{C}$ -NMR spectrum of compound **3b**.

Alaa-DA17 #533 RT: 1.84 AV: 1 NL: 2.10E5  
T: {0,0} + c EI Full ms [50.00-500.00]

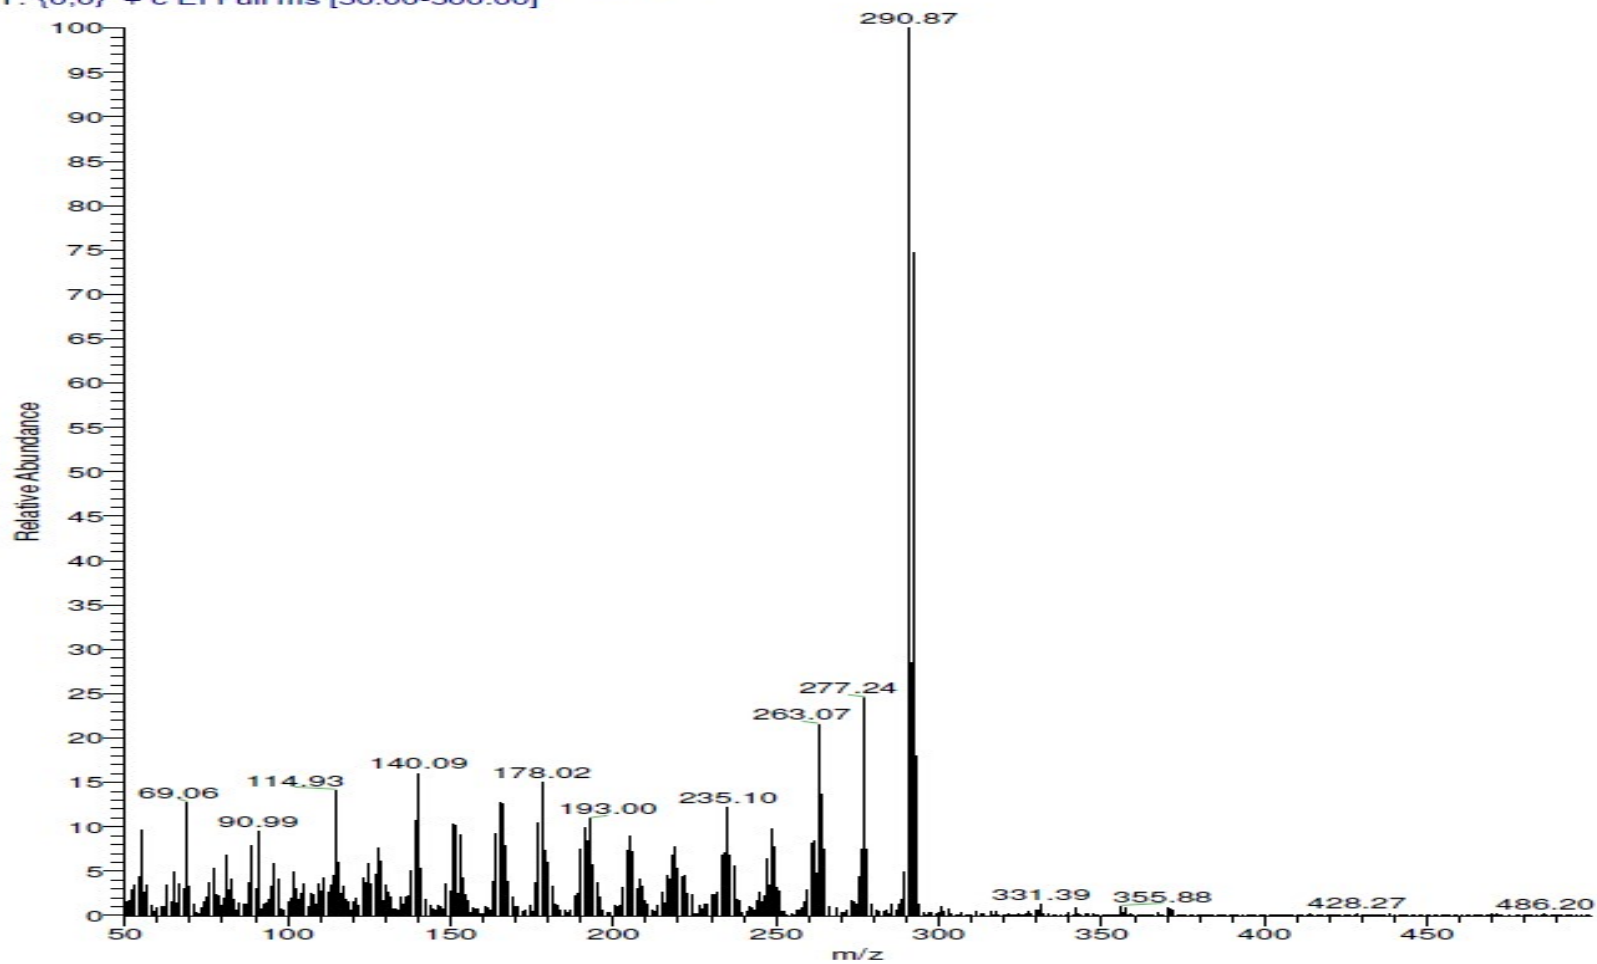

Fig. S8. Mass spectrum of compound 3b.

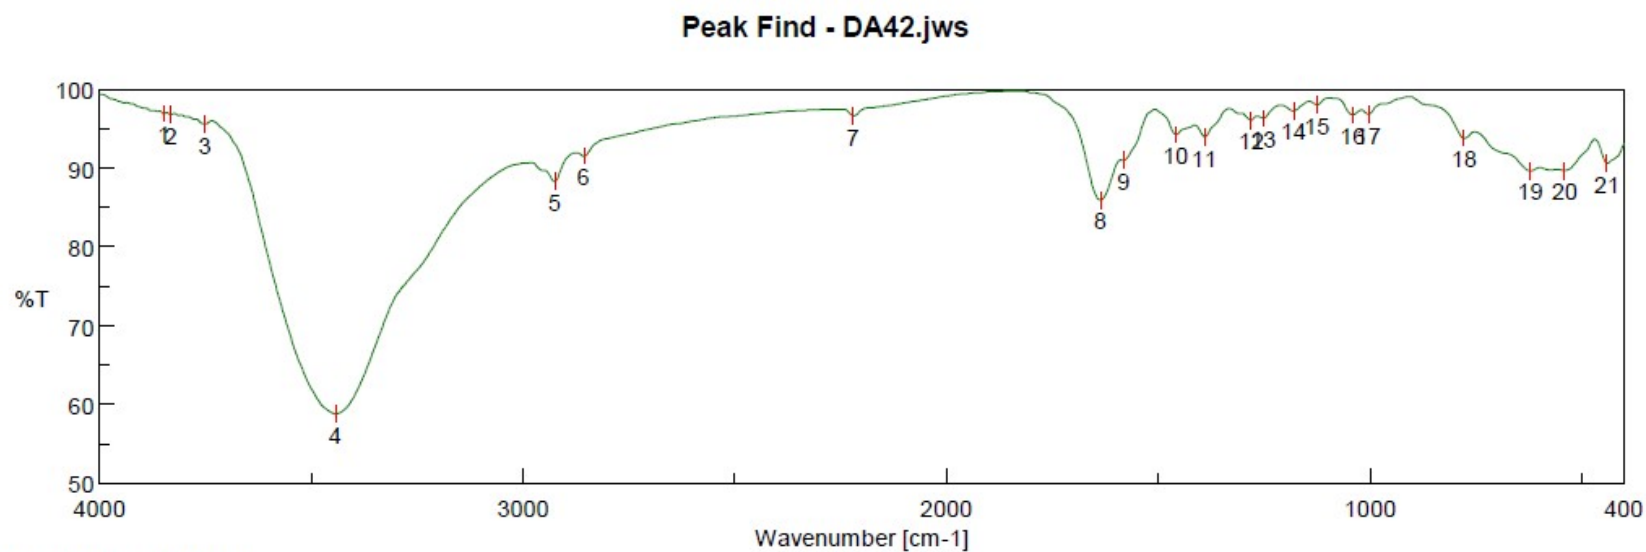

[ Result of Peak Picking ]

| No. | Position | Intensity |
|-----|----------|-----------|-----|----------|-----------|-----|----------|-----------|-----|----------|-----------|
| 1   | 3847.29  | 96.8641   | 2   | 3831.86  | 96.7884   | 3   | 3750.87  | 95.6042   | 4   | 3442.31  | 58.7584   |
| 5   | 2925.48  | 88.2794   | 6   | 2856.06  | 91.4975   | 7   | 2219.67  | 96.599    | 8   | 1635.34  | 85.936    |
| 9   | 1581.34  | 90.964    | 10  | 1457.92  | 94.2459   | 11  | 1390.42  | 93.9422   | 12  | 1280.5   | 96.045    |
| 13  | 1251.58  | 96.3446   | 14  | 1180.22  | 97.2394   | 15  | 1124.3   | 98.0304   | 16  | 1041.37  | 96.7536   |
| 17  | 1002.8   | 96.8377   | 18  | 777.172  | 93.7493   | 19  | 620.966  | 89.6129   | 20  | 539.971  | 89.6452   |
| 21  | 439.69   | 90.5672   |     |          |           |     |          |           |     |          |           |

**Fig. S9.** IR spectrum of compound **3c** (KBr pellet).

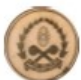

Dr\_AlaaEldinSrou-DA42

Dr\_AlaaEldinSrou-DA42

Sample Name Dr\_AlaaEldinSrou-DA42  
Date collected 2018-02-11

Pulse sequence PROTON  
Solvent CDCL3

Temperature 25  
Spectrometer nmr400-mercury400

Study owner vnmr1  
Operator vnmr1

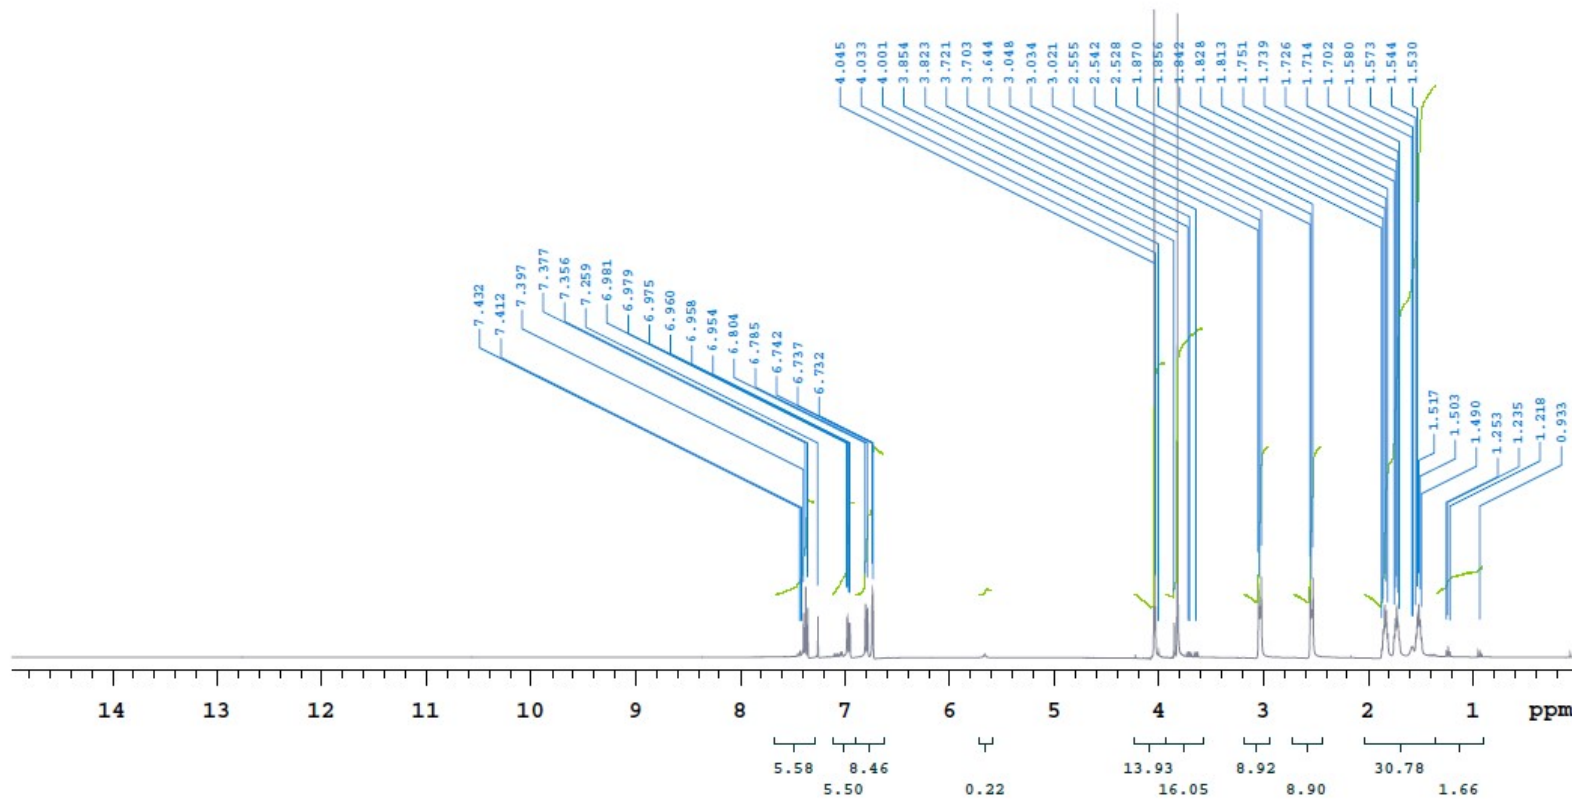

Fig. S10.  $^1\text{H}$ -NMR spectrum of compound **3c**.

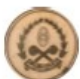

Dr\_AlaaEldinSrou-DA42

Dr\_AlaaEldinSrou-DA42

Sample Name Dr\_AlaaEldinSrou-DA42  
Date collected 2018-02-11

Pulse sequence CARBON  
Solvent CDCL3

Temperature 25  
Spectrometer nmr400-mercury400

Study owner vnmr1  
Operator vnmr1

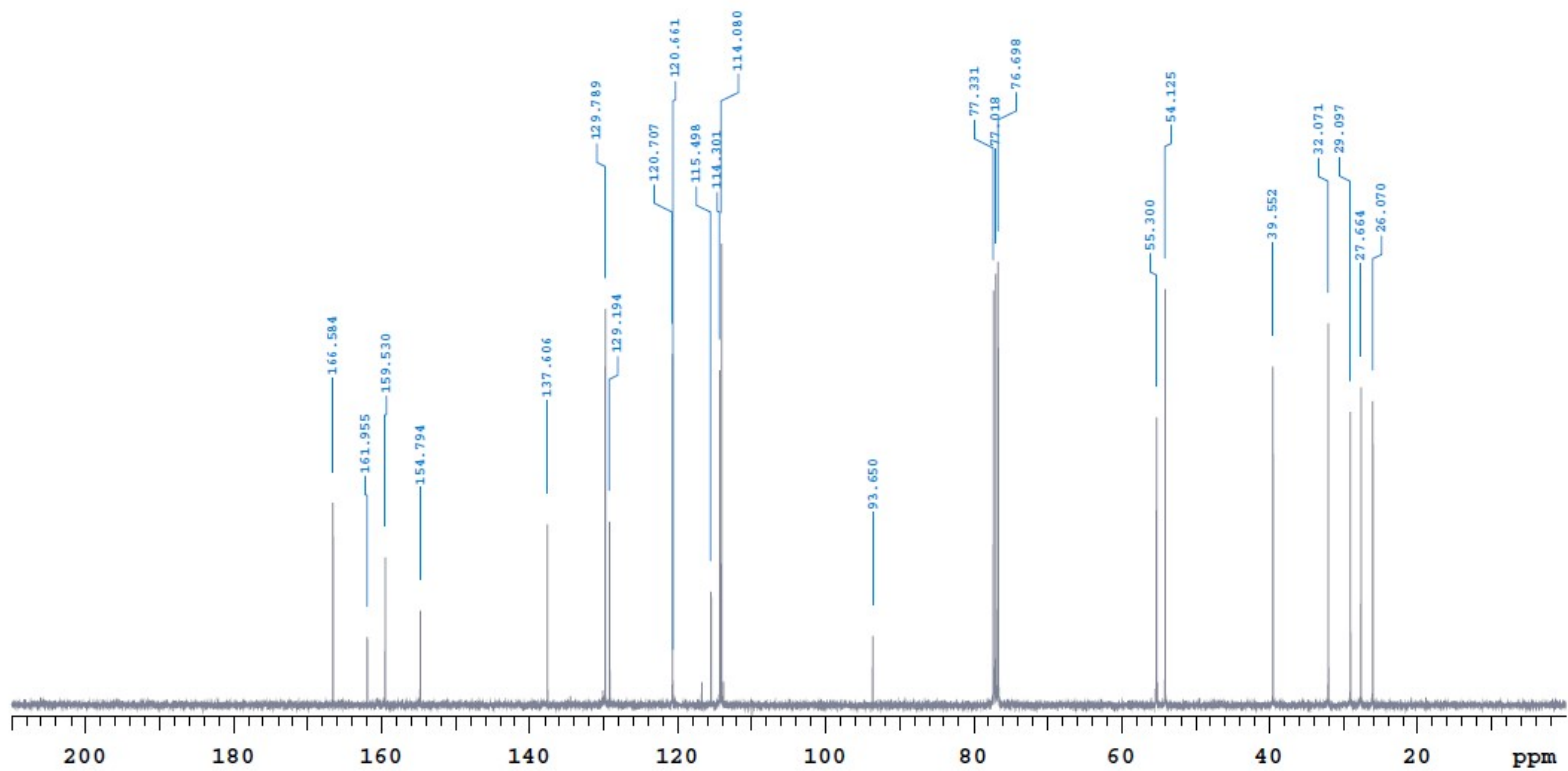

Fig. S11. <sup>13</sup>C-NMR spectrum of compound 3c.

DA42 #811 RT: 2.79 AV: 1 NL: 2.82E6  
T: {0,0} + c EI Full ms [50.00-500.00]

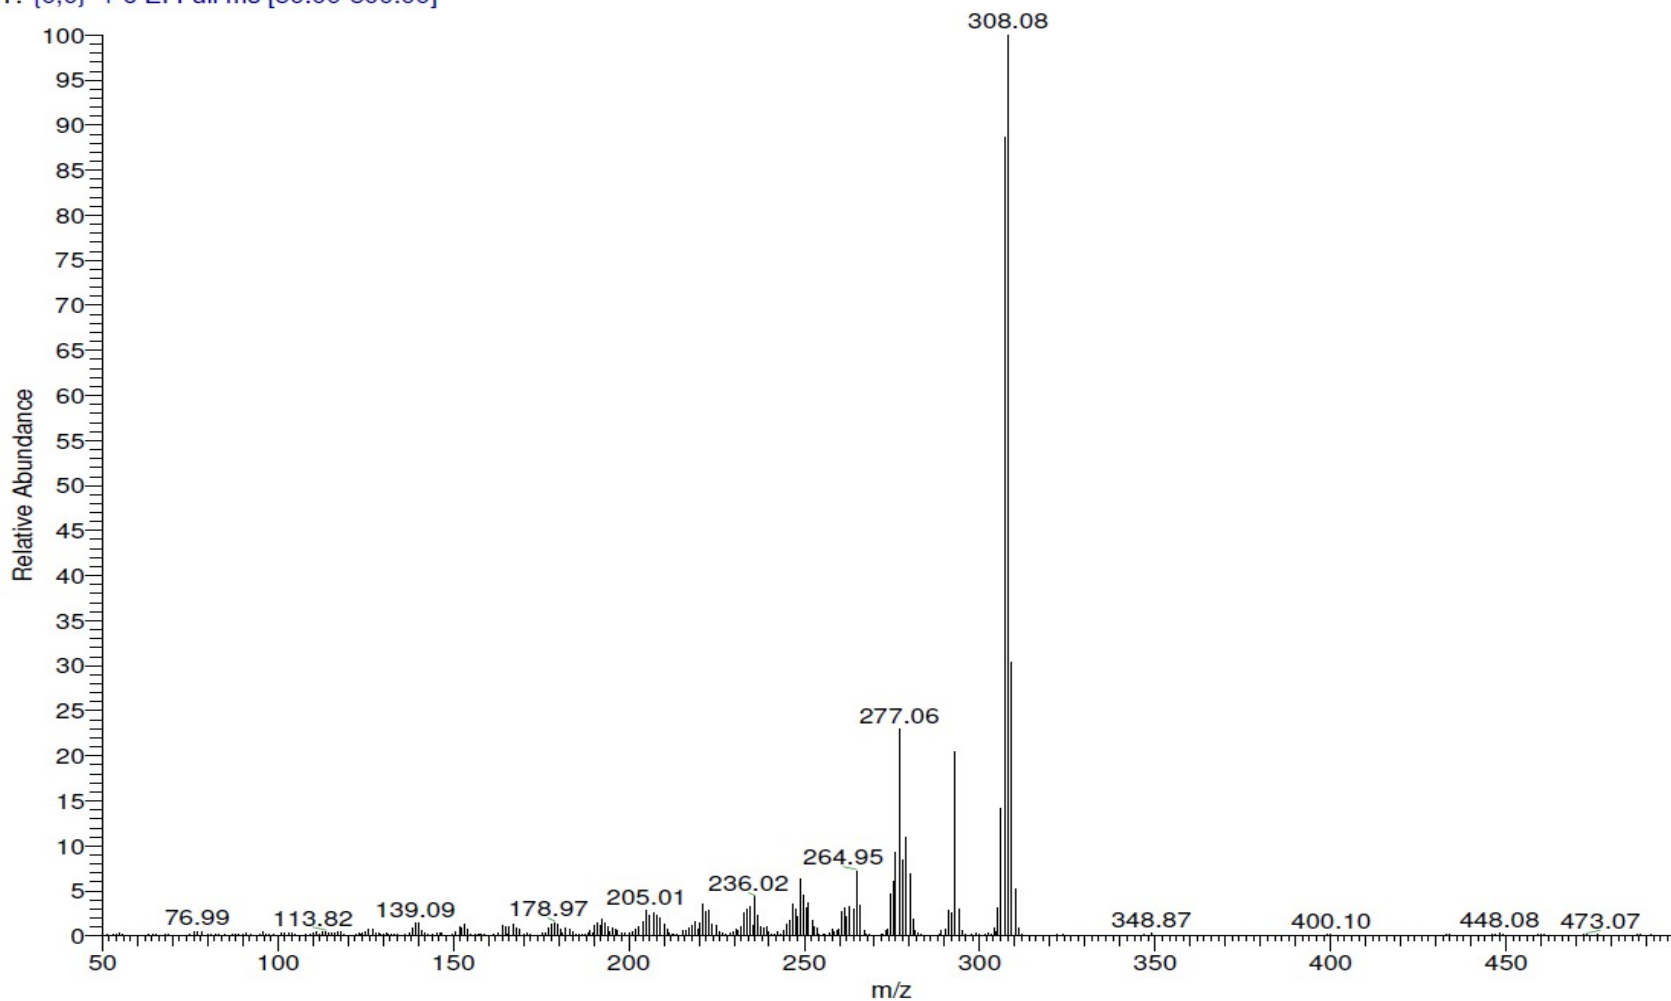

Fig. S12. Mass spectrum of compound 3c.



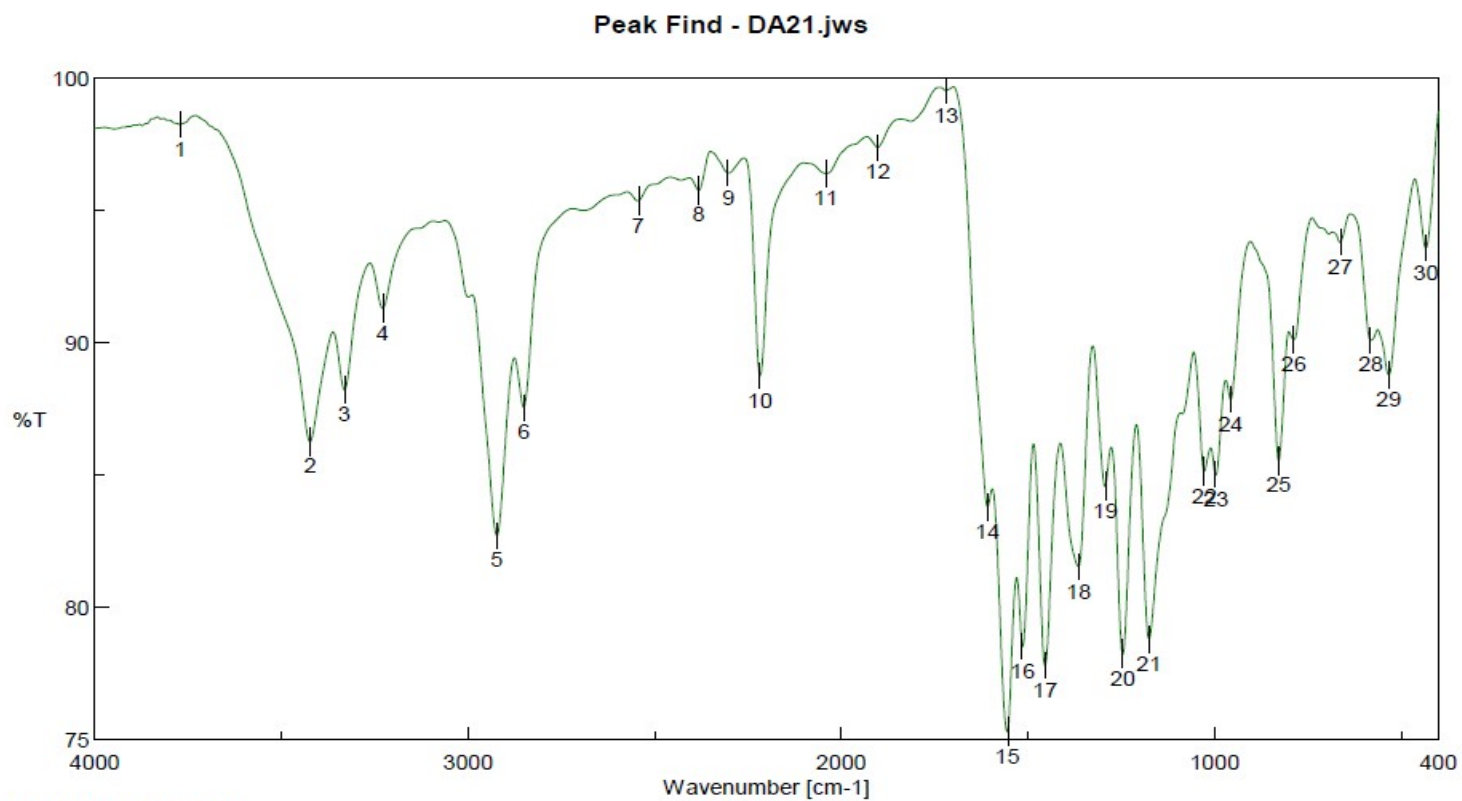

[ Result of Peak Picking ]

| No. | Position | Intensity |
|-----|----------|-----------|-----|----------|-----------|-----|----------|-----------|-----|----------|-----------|
| 1   | 3772.08  | 98.2336   | 2   | 3423.03  | 86.259    | 3   | 3331.43  | 88.2079   | 4   | 3229.22  | 91.2961   |
| 5   | 2922.59  | 82.7008   | 6   | 2851.24  | 87.5587   | 7   | 2545.58  | 95.3499   | 8   | 2381.66  | 95.7496   |
| 9   | 2301.63  | 96.4068   | 10  | 2217.74  | 88.7428   | 11  | 2041.28  | 96.391    | 12  | 1902.43  | 97.3677   |
| 13  | 1719.23  | 99.5181   | 14  | 1608.34  | 83.7968   | 15  | 1555.31  | 75.2932   | 16  | 1513.85  | 78.5161   |
| 17  | 1454.06  | 77.7852   | 18  | 1364.39  | 81.5332   | 19  | 1293.04  | 84.5622   | 20  | 1245.79  | 78.2198   |
| 21  | 1175.4   | 78.8032   | 22  | 1027.87  | 85.1375   | 23  | 996.053  | 84.9943   | 24  | 956.52   | 87.8492   |
| 25  | 828.277  | 85.5454   | 26  | 786.815  | 90.1235   | 27  | 663.393  | 93.7796   | 28  | 581.433  | 90.0868   |
| 29  | 533.221  | 88.7856   | 30  | 433.905  | 93.5624   |     |          |           |     |          |           |

**Fig. S13.** IR spectrum of compound **3d** (KBr pellet).

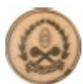

Dr\_ZaneebNovel-21

Dr\_ZaneebNovel-21

Sample Name Dr\_ZaneebNovel-21  
Date collected 2017-04-27

Pulse sequence PROTON  
Solvent cdcl3

Temperature 25  
Spectrometer nmr400-mercury400

Study owner vnmr1  
Operator vnmr1

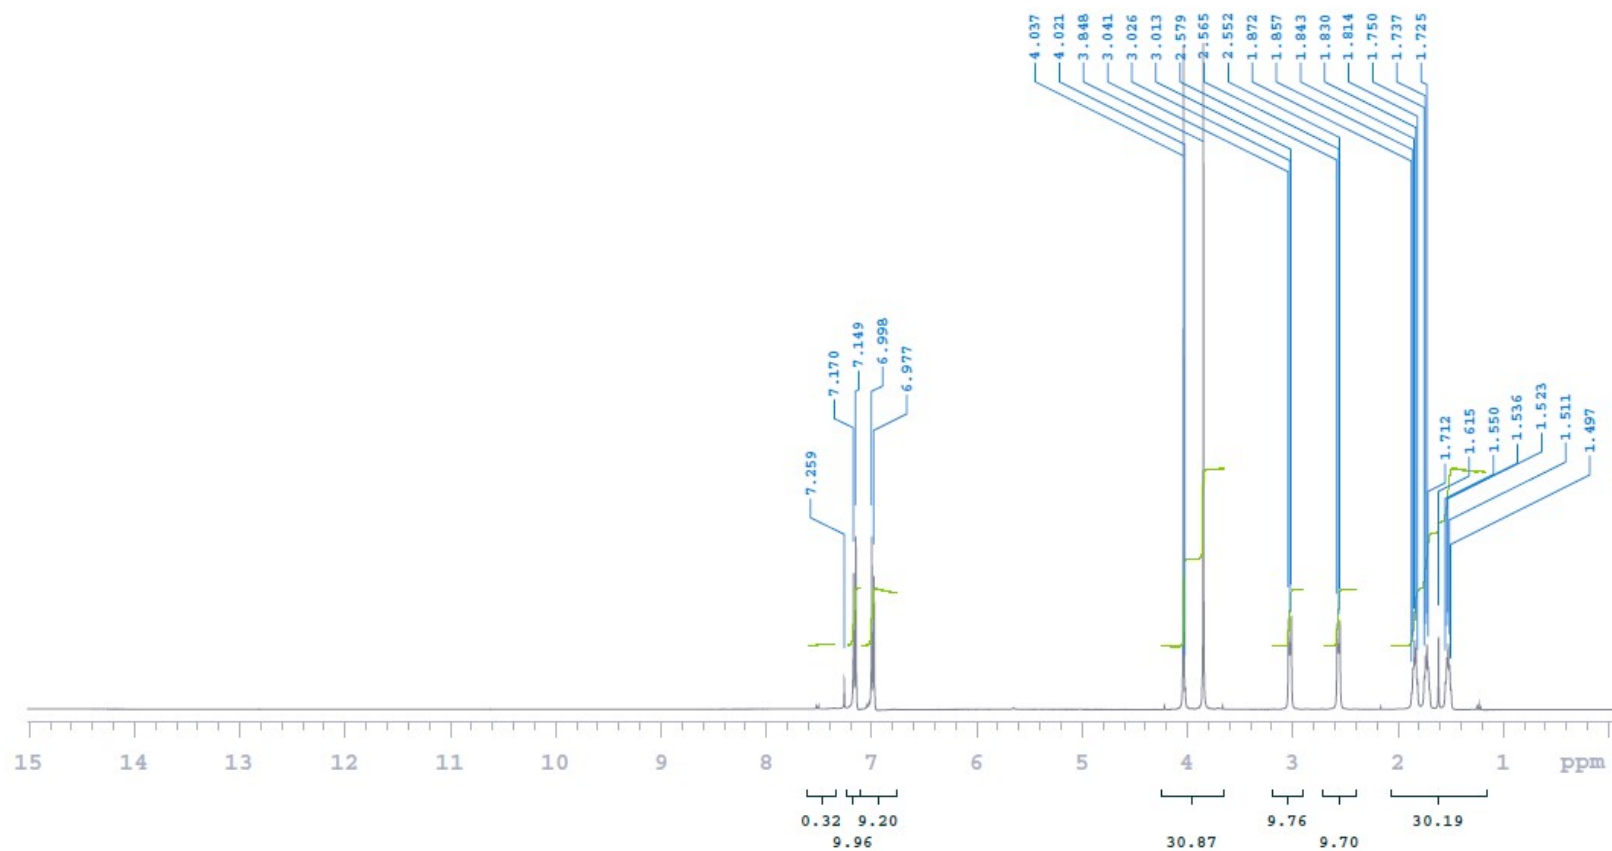

Fig. S14.  $^1\text{H}$ -NMR spectrum of compound **3d**.

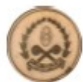

Dr\_ZaneebNovel-DA21

Dr\_ZaneebNovel-DA21

Sample Name Dr\_ZaneebNovel-DA21  
Date collected 2017-08-02

Pulse sequence CARBON  
Solvent cdcl3

Temperature 25  
Spectrometer nmr400-mercury400

Study owner vnmr1  
Operator vnmr1

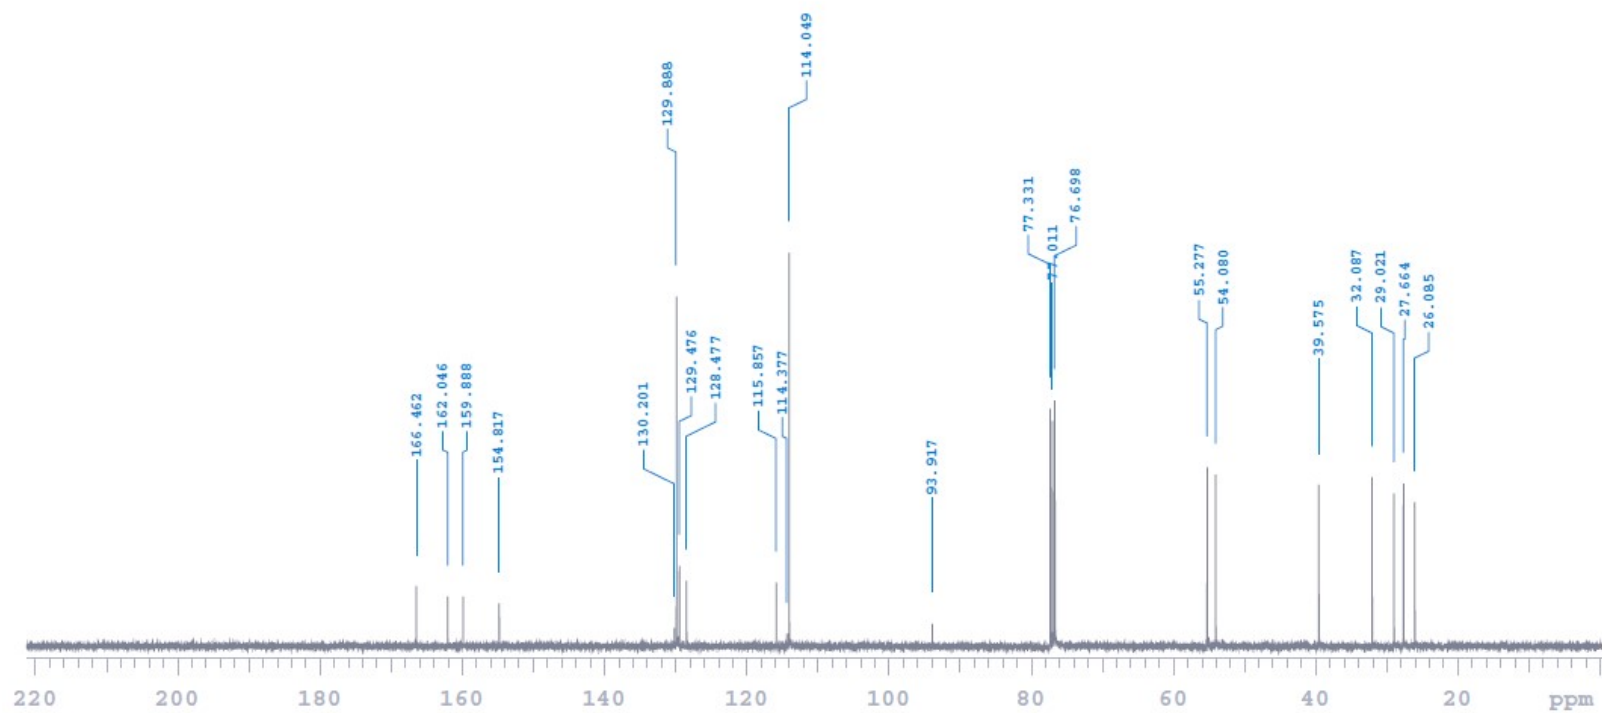

Fig. S15. <sup>13</sup>C-NMR spectrum of compound 3d.

Alaa-DA21 #454 RT: 1.57 AV: 1 NL: 5.74E5  
T: {0,0} + c EI Full ms [50.00-500.00]

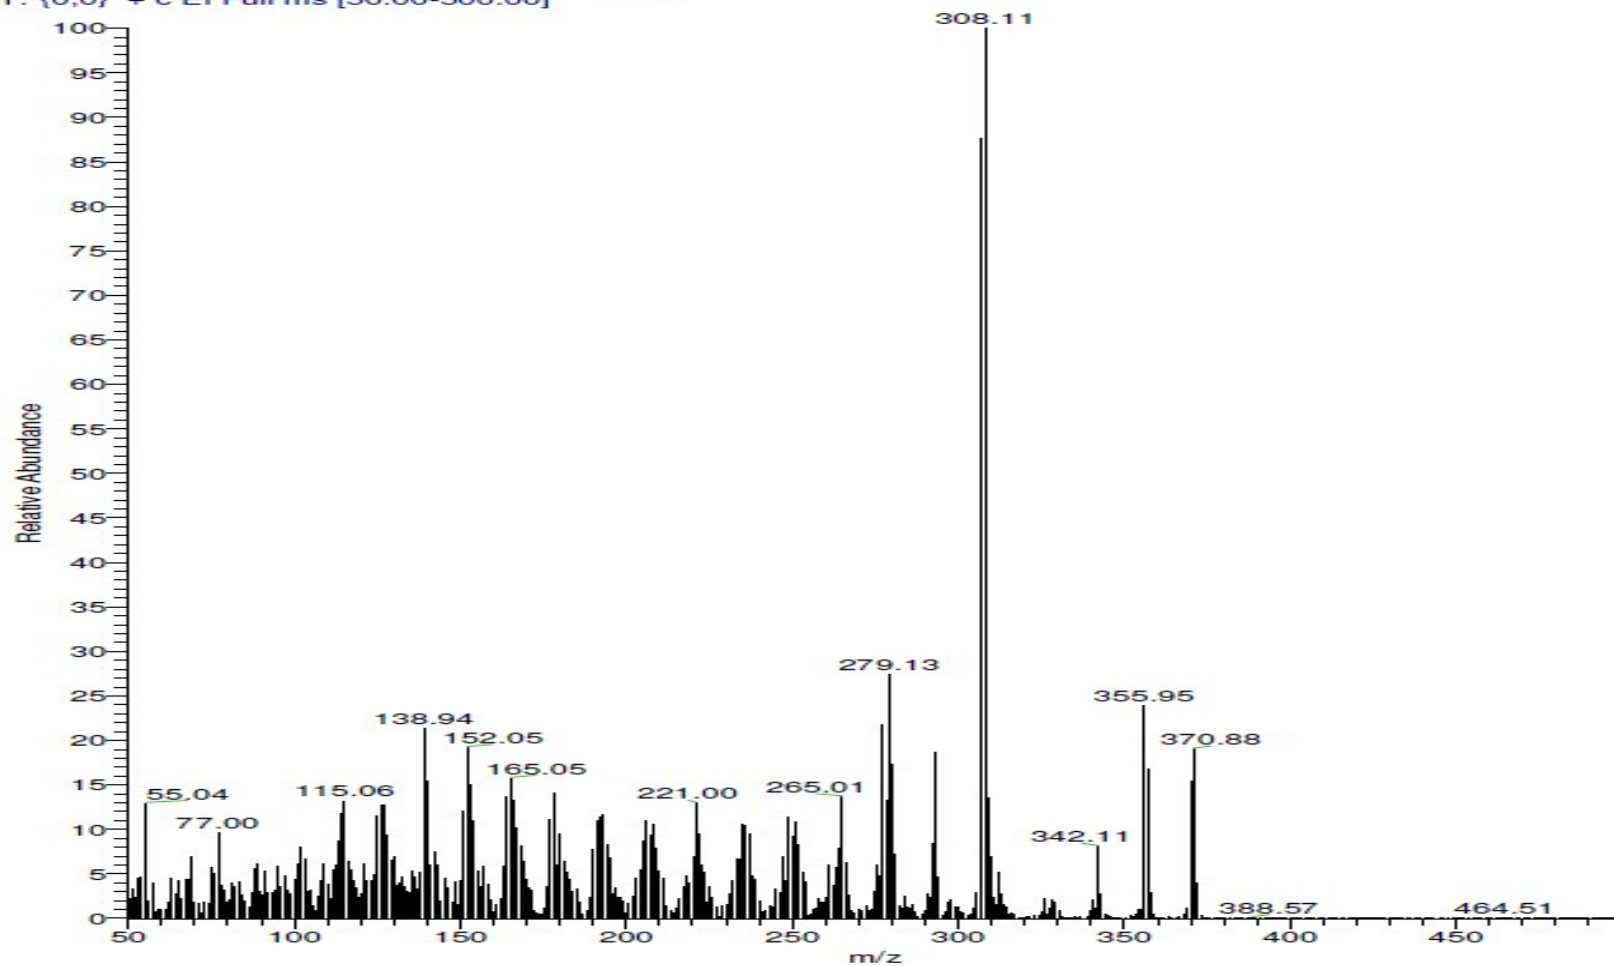

Fig. S16. Mass spectrum of compound 3d.

Peak Find - da 6.jws

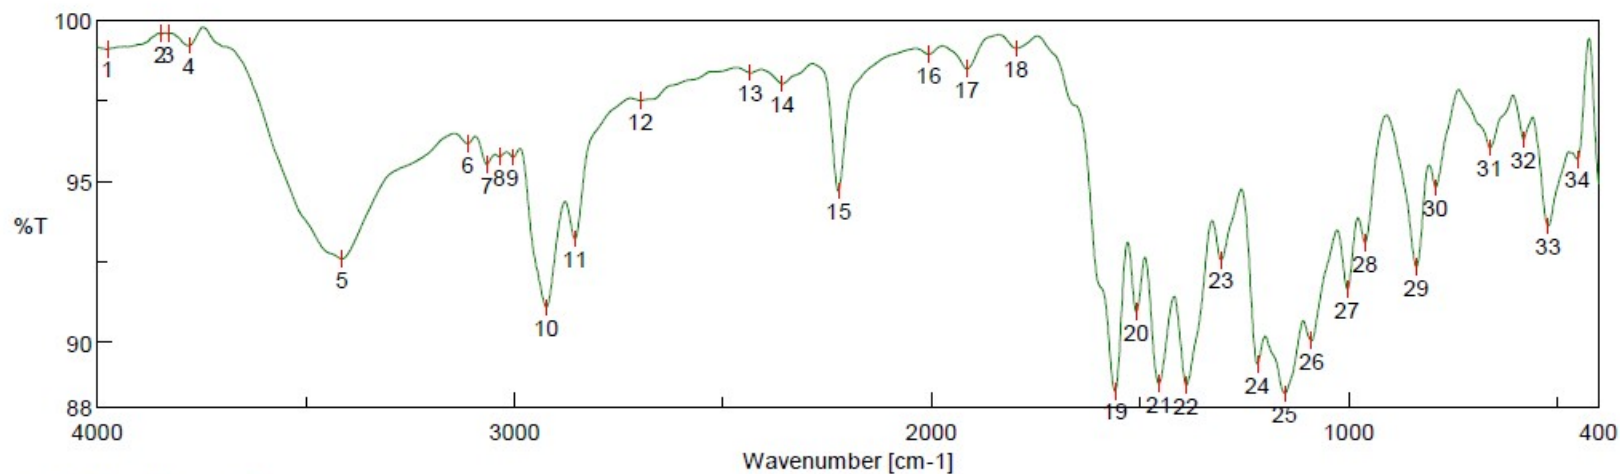

[ Result of Peak Picking ]

| No. | Position | Intensity |
|-----|----------|-----------|-----|----------|-----------|-----|----------|-----------|-----|----------|-----------|
| 1   | 3976.5   | 99.0938   | 2   | 3849.22  | 99.5602   | 3   | 3829.94  | 99.5634   | 4   | 3780.76  | 99.1966   |
| 5   | 3413.39  | 92.5884   | 6   | 3111.58  | 96.1627   | 7   | 3066.26  | 95.5242   | 8   | 3036.37  | 95.7567   |
| 9   | 3003.59  | 95.7376   | 10  | 2923.56  | 91.0914   | 11  | 2855.1   | 93.2081   | 12  | 2698.89  | 97.498    |
| 13  | 2434.69  | 98.3555   | 14  | 2357.55  | 98.0131   | 15  | 2223.52  | 94.6953   | 16  | 2007.53  | 98.9327   |
| 17  | 1914.97  | 98.4806   | 18  | 1797.33  | 99.1086   | 19  | 1560.13  | 88.4876   | 20  | 1509.03  | 90.9518   |
| 21  | 1454.06  | 88.7255   | 22  | 1389.46  | 88.6727   | 23  | 1305.57  | 92.5561   | 24  | 1218.79  | 89.3275   |
| 25  | 1153.22  | 88.4185   | 26  | 1088.62  | 90.0541   | 27  | 1002.8   | 91.6451   | 28  | 960.377  | 93.0884   |
| 29  | 836.955  | 92.3338   | 30  | 790.671  | 94.8083   | 31  | 661.464  | 96.024    | 32  | 580.469  | 96.2947   |
| 33  | 521.65   | 93.6066   | 34  | 451.261  | 95.6789   |     |          |           |     |          |           |

Fig. S17. IR spectrum of compound 3e (KBr pellet).

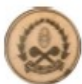

Dr\_ZaneebNovel-6

Dr\_ZaneebNovel-6

Sample Name Dr\_ZaneebNovel-6  
Date collected 2017-04-27

Pulse sequence PROTON  
Solvent cdcl3

Temperature 25  
Spectrometer nmr400-mercury400

Study owner vnmr1  
Operator vnmr1

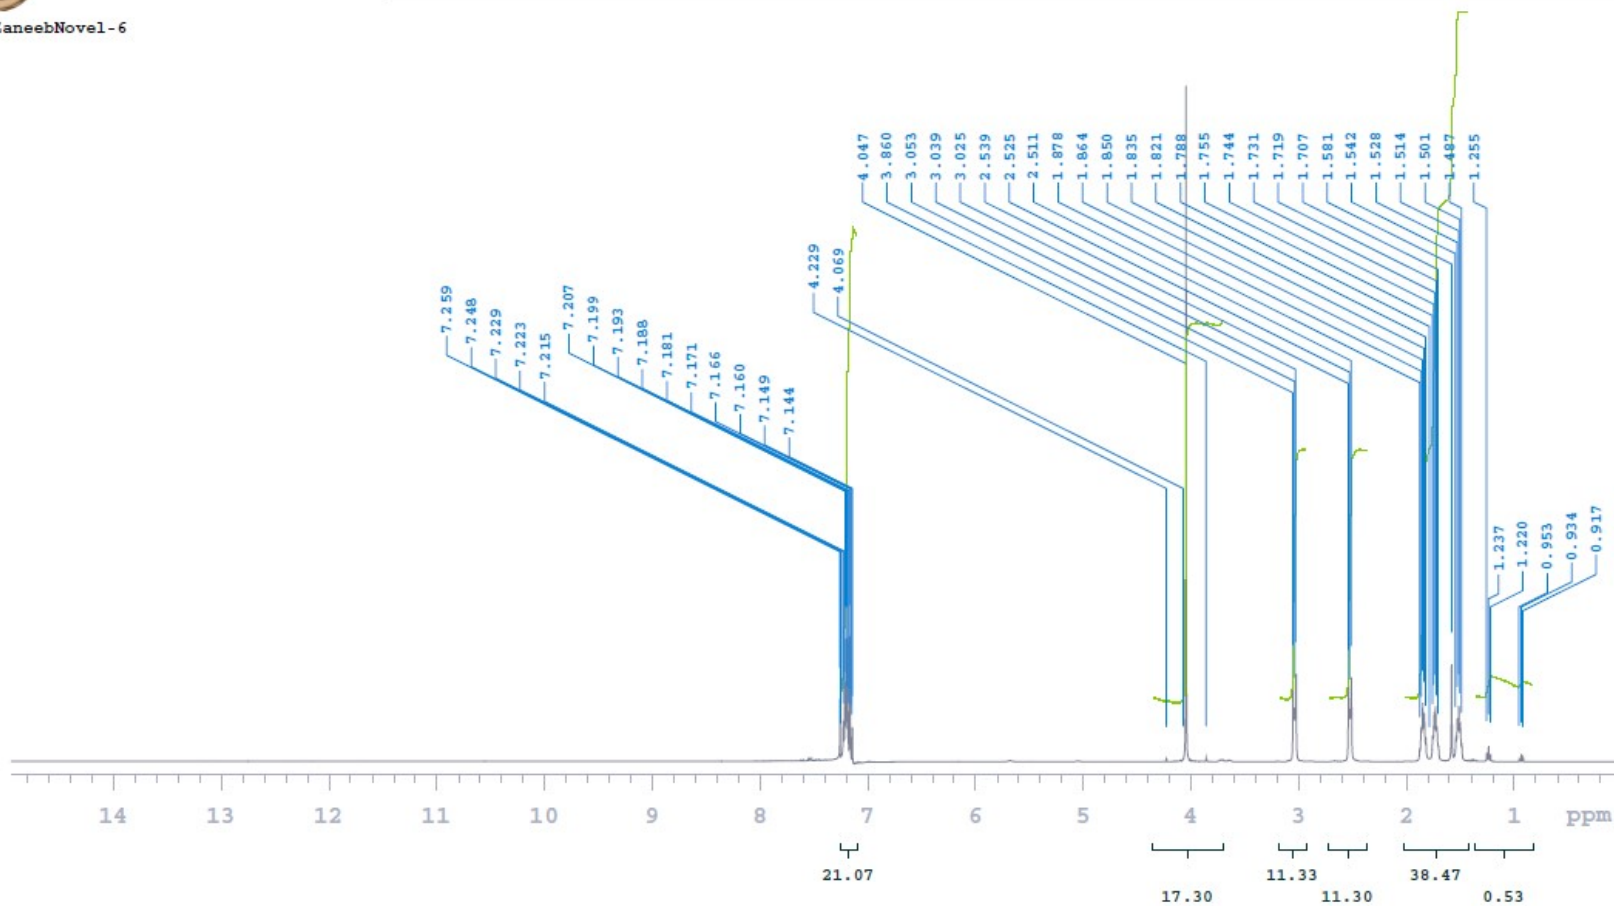

Fig. S18.  $^1\text{H-NMR}$  spectrum of compound **3e**.

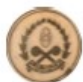

Dr\_ZaneebNovel-DA6

Dr\_ZaneebNovel-DA6

Sample Name Dr\_ZaneebNovel-DA6  
Date collected 2017-07-30

Pulse sequence CARBON  
Solvent cdcl3

Temperature 25  
Spectrometer nmr400-mercury400

Study owner vnmr1  
Operator vnmr1

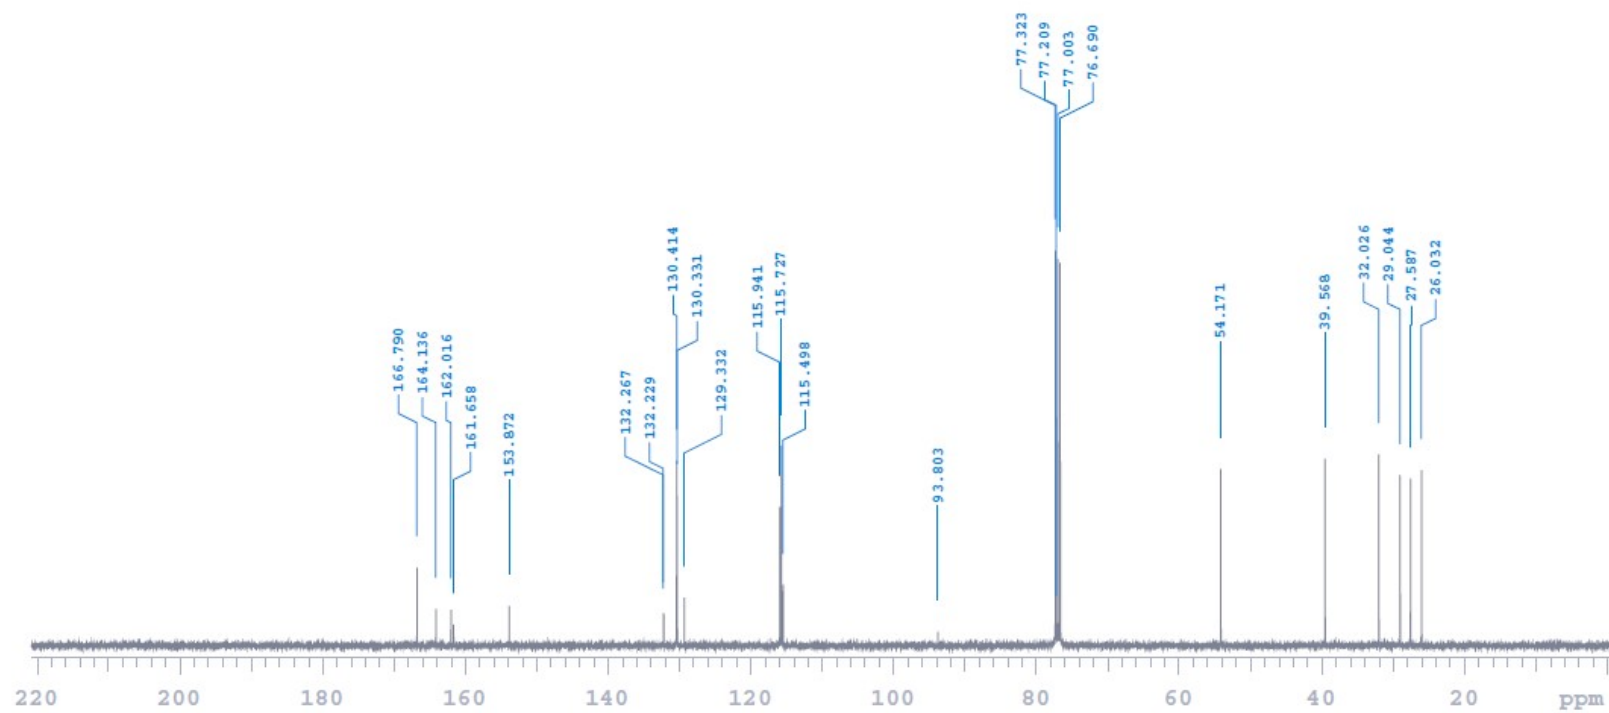

Fig. S19.  $^{13}\text{C}$ -NMR spectrum of compound **3e**.

Alaa-DA6 #591 RT: 2.04 AV: 1 NL: 1.25E6  
T: {0,0} + c EI Full ms [50.00-500.00]

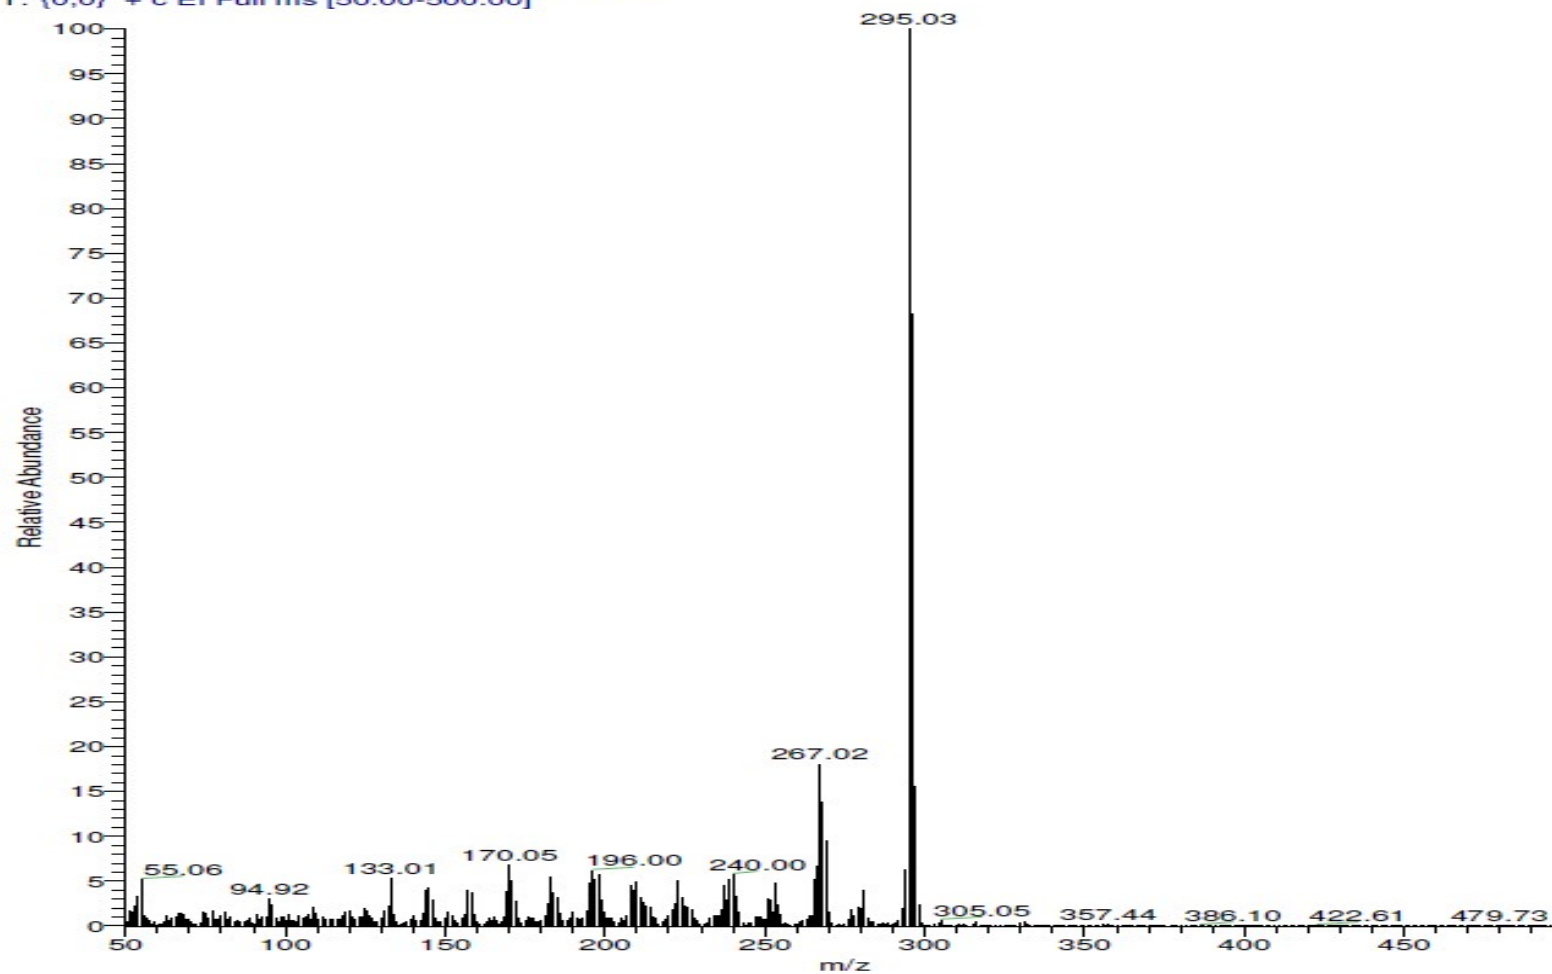

Fig. S20. Mass spectrum of compound 3e.



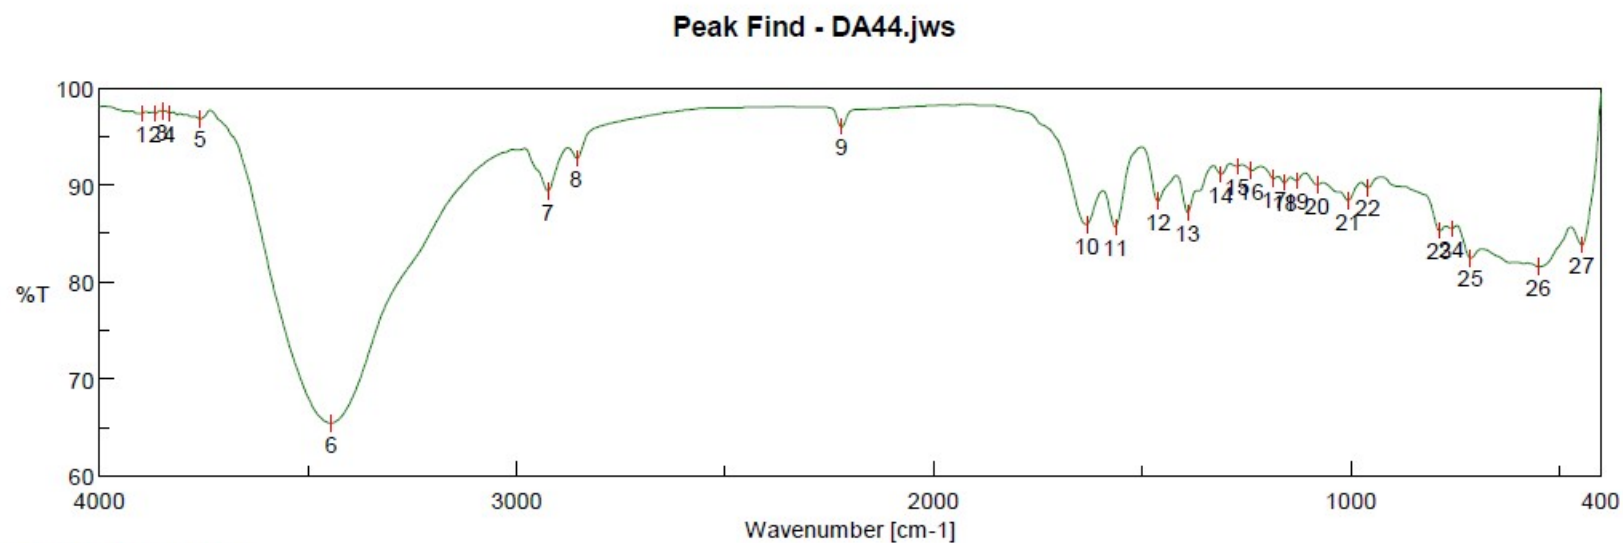

[ Result of Peak Picking ]

| No. | Position | Intensity |
|-----|----------|-----------|-----|----------|-----------|-----|----------|-----------|-----|----------|-----------|
| 1   | 3899.36  | 97.3476   | 2   | 3864.65  | 97.3727   | 3   | 3849.22  | 97.5446   | 4   | 3831.86  | 97.3921   |
| 5   | 3758.58  | 96.7903   | 6   | 3444.24  | 65.4102   | 7   | 2925.48  | 89.3844   | 8   | 2856.06  | 92.7654   |
| 9   | 2219.67  | 95.9839   | 10  | 1633.41  | 85.8884   | 11  | 1563.99  | 85.6607   | 12  | 1461.78  | 88.2979   |
| 13  | 1390.42  | 87.137    | 14  | 1311.36  | 91.0958   | 15  | 1272.79  | 91.9247   | 16  | 1238.08  | 91.4687   |
| 17  | 1184.08  | 90.6419   | 18  | 1159.01  | 90.2115   | 19  | 1130.08  | 90.4003   | 20  | 1079.94  | 90.02     |
| 21  | 1006.66  | 88.3911   | 22  | 958.448  | 89.7328   | 23  | 786.815  | 85.2741   | 24  | 757.888  | 85.4919   |
| 25  | 713.533  | 82.4401   | 26  | 549.613  | 81.5578   | 27  | 445.476  | 83.7627   |     |          |           |

**Fig. S21.** IR spectrum of compound **3f** (KBr pellet).

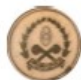

Dr\_AlaaEldinSrouer-DA44

Dr\_AlaaEldinSrouer-DA44

Sample Name Dr\_AlaaEldinSrouer-DA44  
Date collected 2018-02-14

Pulse sequence PROTON  
Solvent CDCL3

Temperature 25  
Spectrometer nmr400-mercury400

Study owner vnmr1  
Operator vnmr1

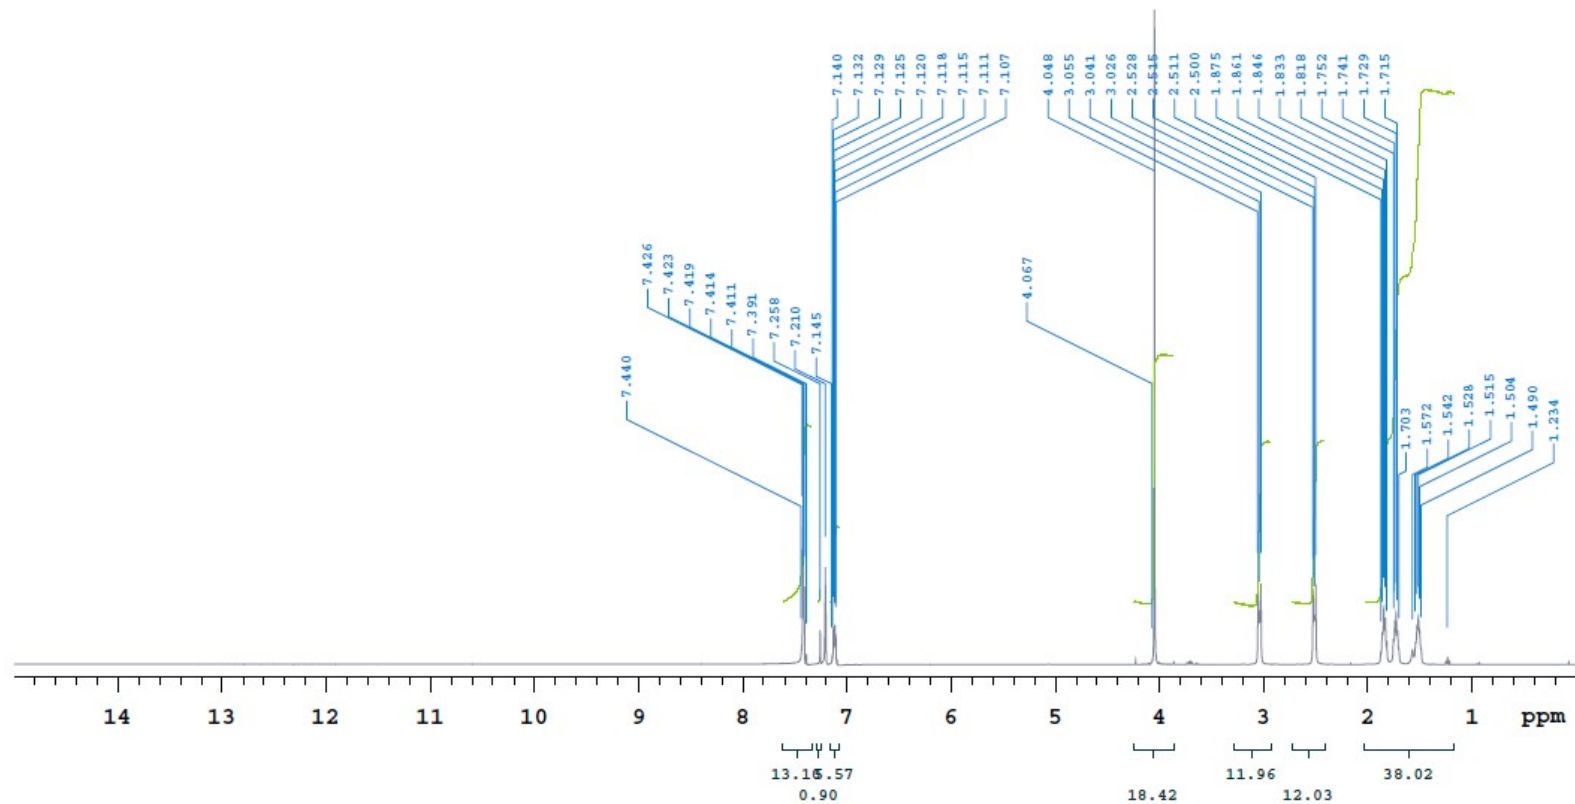

Fig. S22. <sup>1</sup>H-NMR spectrum of compound **3f**.

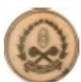

Dr\_AlaaEldinSrou-DA44

Dr\_AlaaEldinSrou-DA44

Sample Name Dr\_AlaaEldinSrou-DA44  
Date collected 2018-02-14

Pulse sequence CARBON  
Solvent CDCL3

Temperature 25  
Spectrometer nmr400-mercury400

Study owner vnmr1  
Operator vnmr1

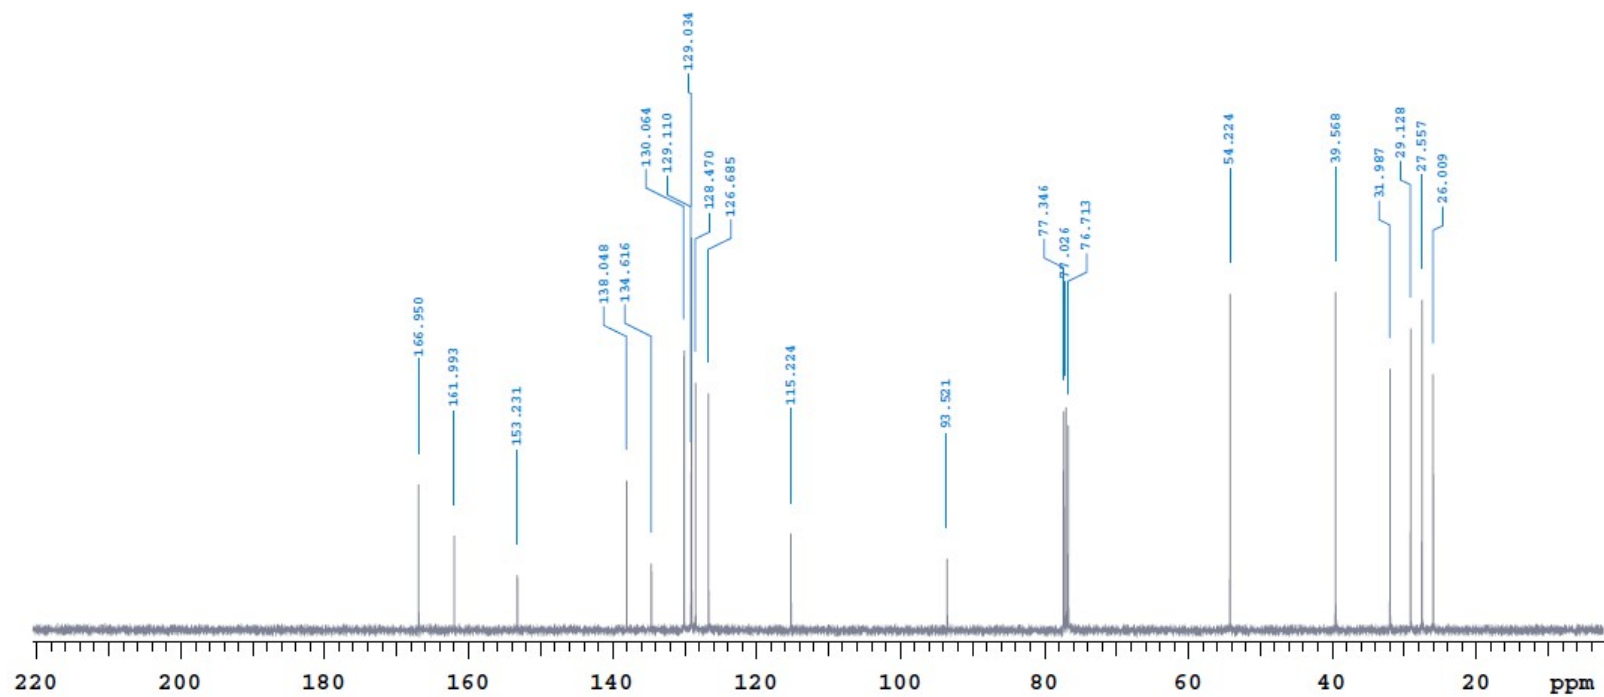

Fig. S23. <sup>13</sup>C-NMR spectrum of compound 3f.

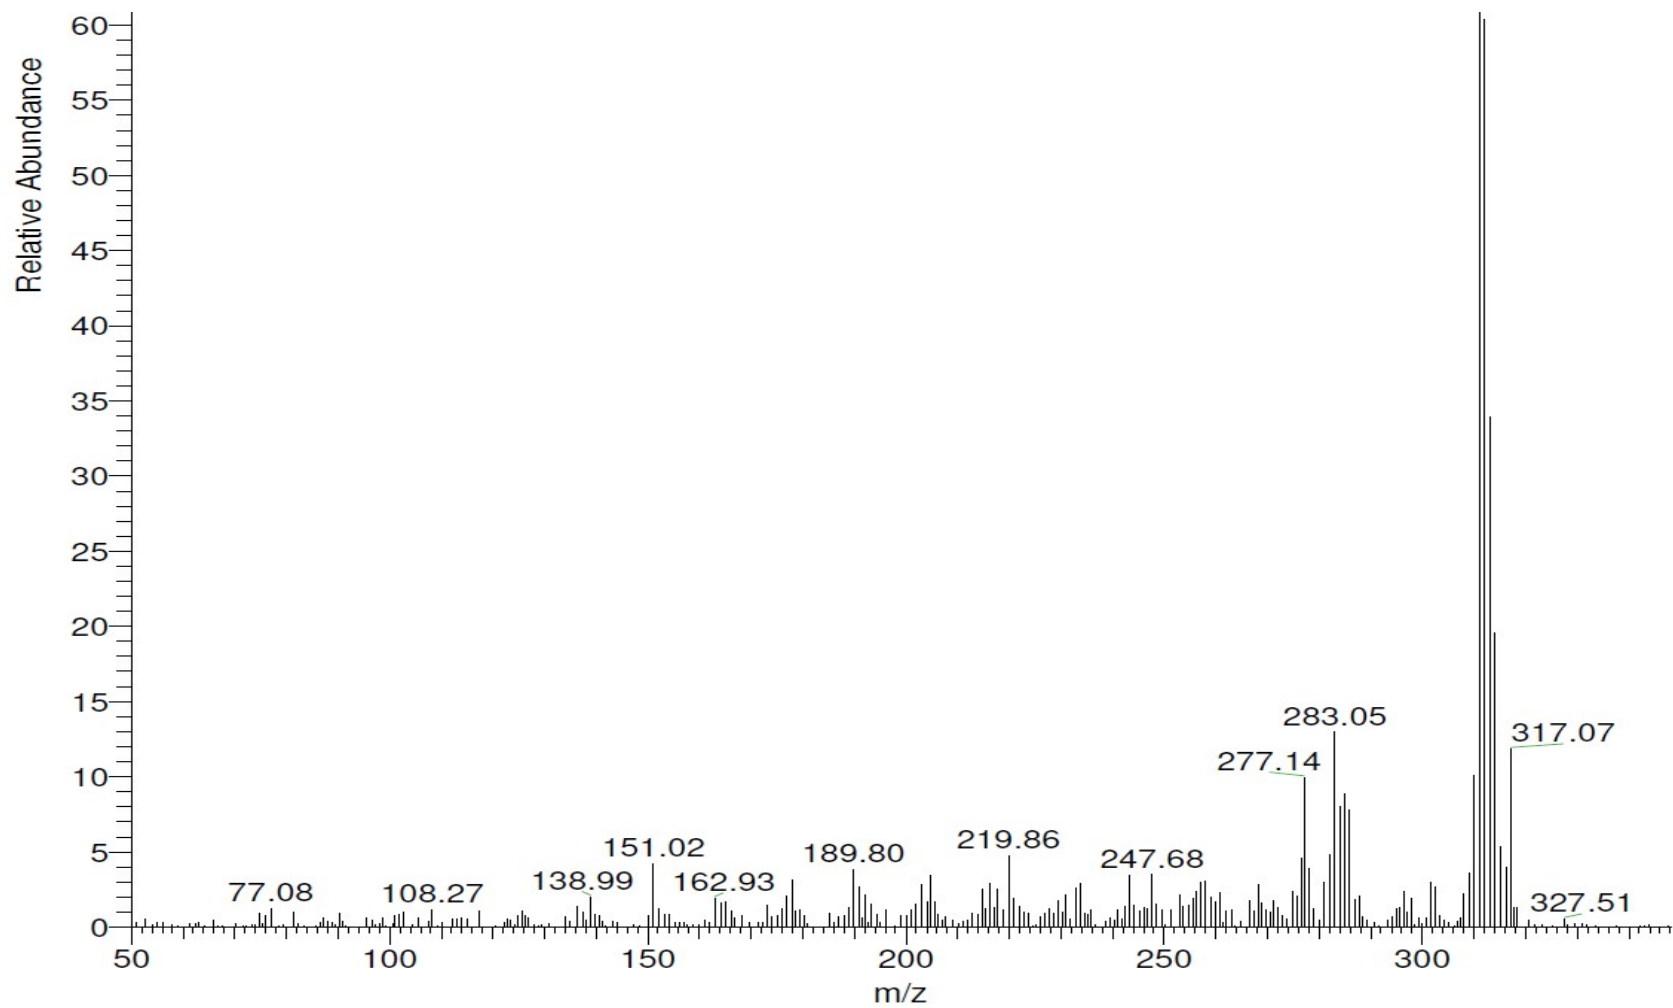

**Fig. S24.** Mass spectrum of compound **3f**.

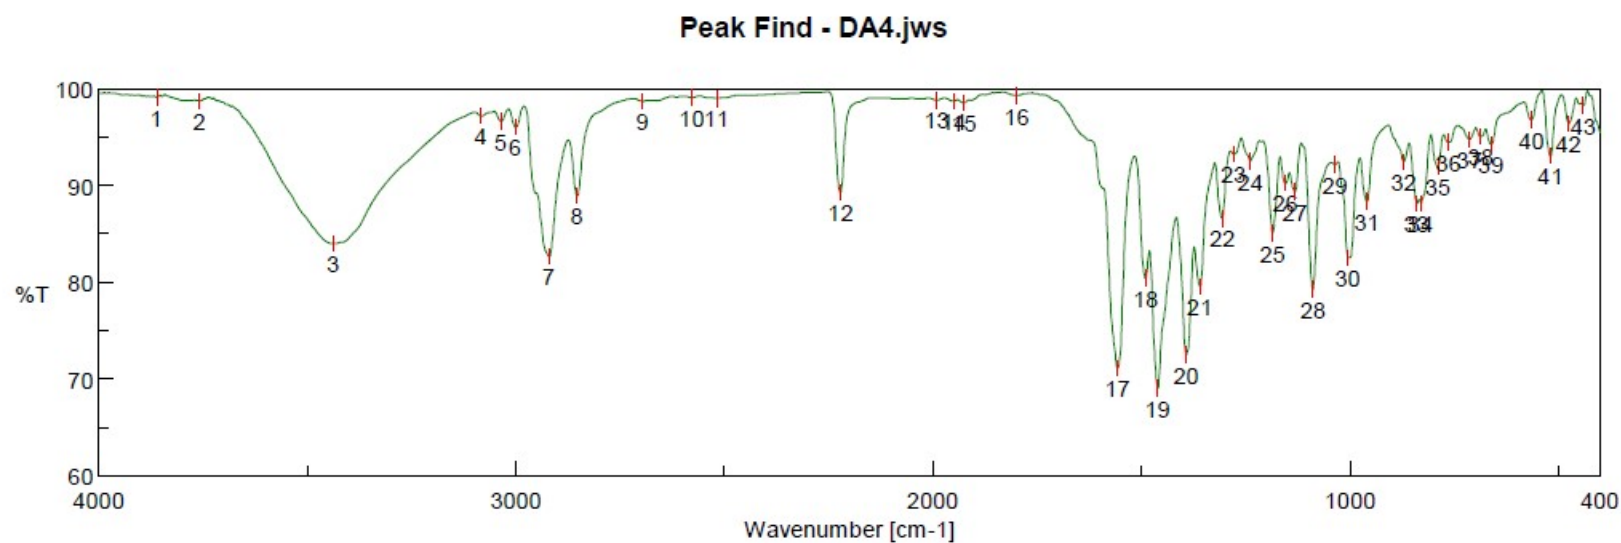

[ Result of Peak Picking ]

| No. | Position | Intensity | No. | Position | Intensity | No. | Position | Intensity |
|-----|----------|-----------|-----|----------|-----------|-----|----------|-----------|
| 1   | 3860.79  | 99.0717   | 2   | 3758.58  | 98.689    | 3   | 3437.49  | 83.9715   |
| 5   | 3035.41  | 96.6238   | 6   | 3000.69  | 95.99     | 7   | 2920.66  | 82.5909   |
| 9   | 2696     | 98.6672   | 10  | 2578.36  | 99.0679   | 11  | 2518.58  | 98.9867   |
| 13  | 1991.14  | 98.8064   | 14  | 1950.64  | 98.6973   | 15  | 1925.57  | 98.5265   |
| 17  | 1557.24  | 71.0861   | 18  | 1489.74  | 80.3857   | 19  | 1460.81  | 69.0135   |
| 21  | 1359.57  | 79.5247   | 22  | 1306.54  | 86.5699   | 23  | 1278.57  | 93.2272   |
| 25  | 1185.04  | 85.0389   | 26  | 1154.19  | 90.2149   | 27  | 1132.01  | 89.3383   |
| 29  | 1035.59  | 92.147    | 30  | 1004.73  | 82.4747   | 31  | 959.412  | 88.3325   |
| 33  | 839.847  | 88.1219   | 34  | 830.205  | 88.1387   | 35  | 788.743  | 91.878    |
| 37  | 712.569  | 94.7473   | 38  | 686.534  | 95.0373   | 39  | 661.464  | 94.2506   |
| 41  | 518.758  | 93.0068   | 42  | 475.367  | 96.3587   | 43  | 439.69   | 98.2441   |

**Fig. S25.** IR spectrum of compound **3g** (KBr pellet).

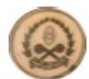

Dr\_ZaneebNovel-4

Dr\_ZaneebNovel-4

Sample Name Dr\_ZaneebNovel-4  
Date collected 2017-04-27

Pulse sequence PROTON  
Solvent cdcl3

Temperature 25  
Spectrometer nmr400-mercury400

Study owner vnmr1  
Operator vnmr1

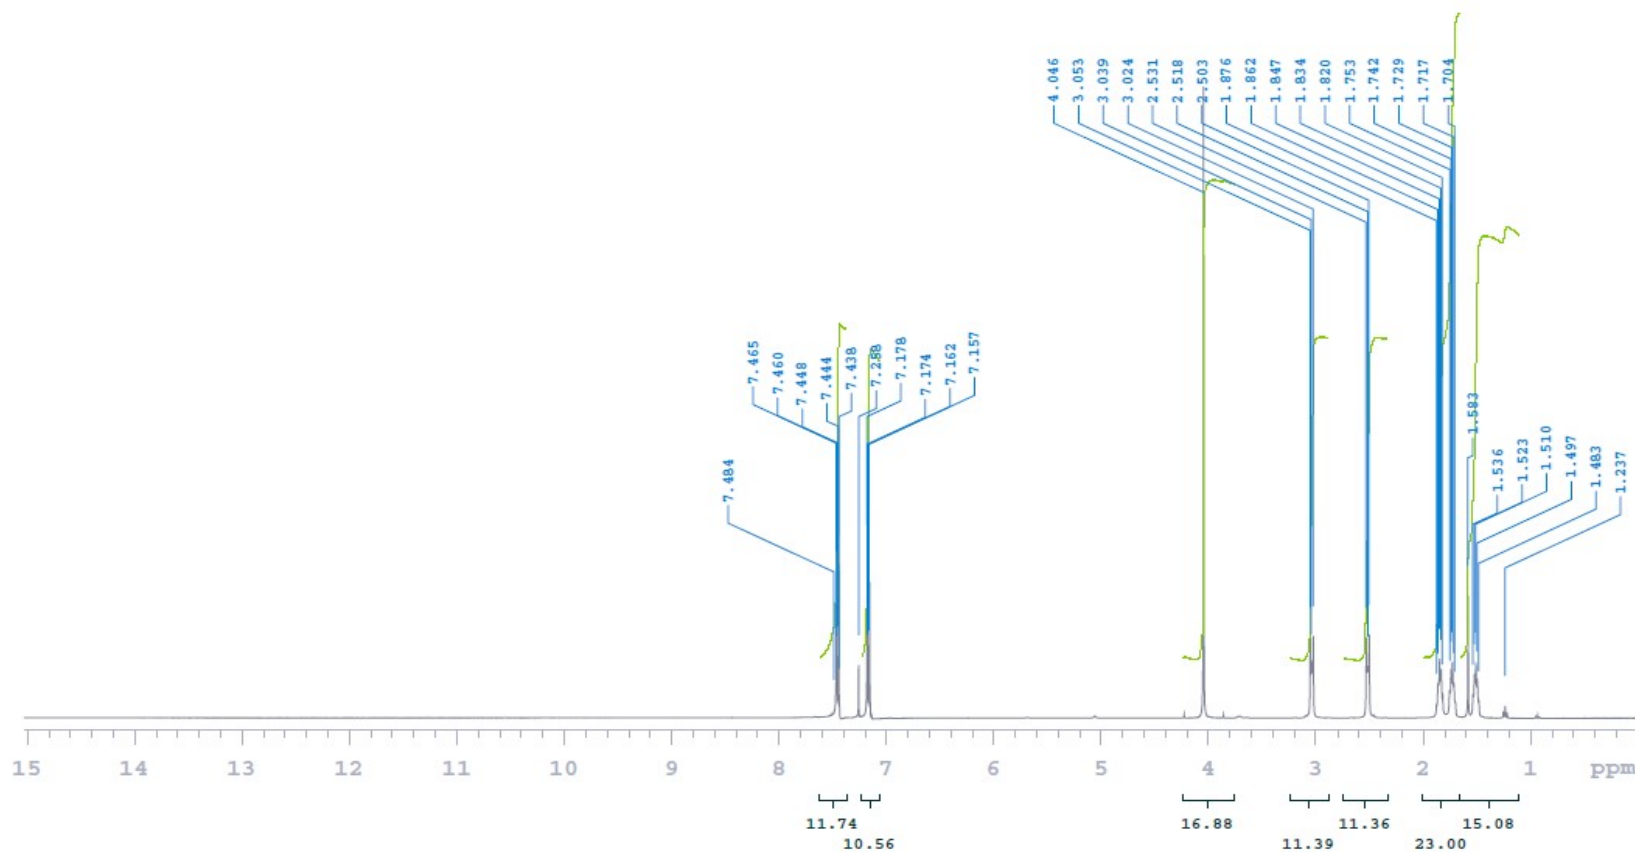

Fig. S26. <sup>1</sup>H-NMR spectrum of compound 3g.

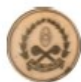

Dr\_ZaneebNovel-DA4

Sample Name Dr\_ZaneebNovel-DA4  
Date collected 2017-07-30

Pulse sequence CARBON  
Solvent cdcl3

Temperature 25  
Spectrometer nmr400-mercury400

Study owner vnmr1  
Operator vnmr1

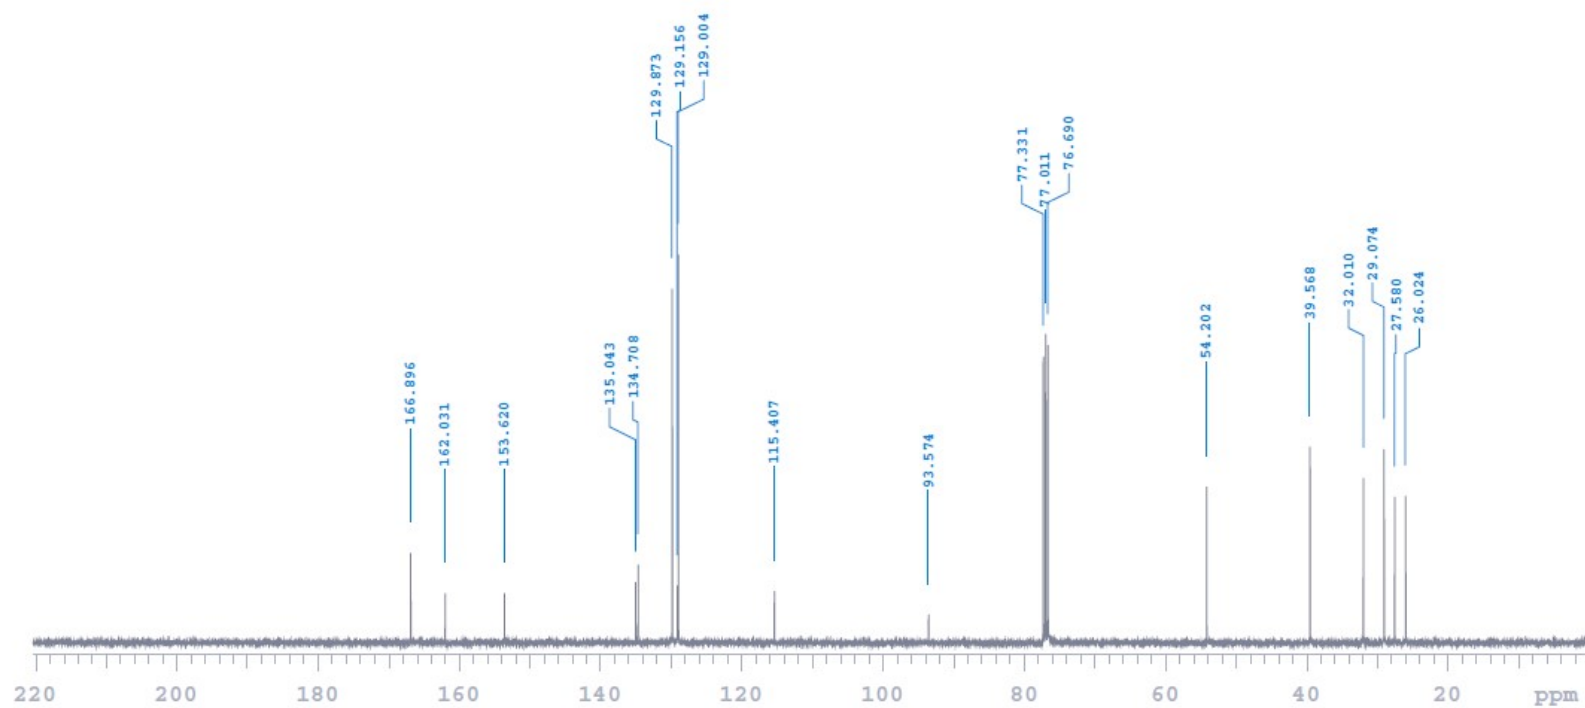

Fig. S27.  $^{13}\text{C}$ -NMR spectrum of compound **3g**.

Alaa-DA4 #764 RT: 2.63 AV: 1 NL: 1.37E6  
T: {0,0} + c EI Full ms [50.00-500.00]

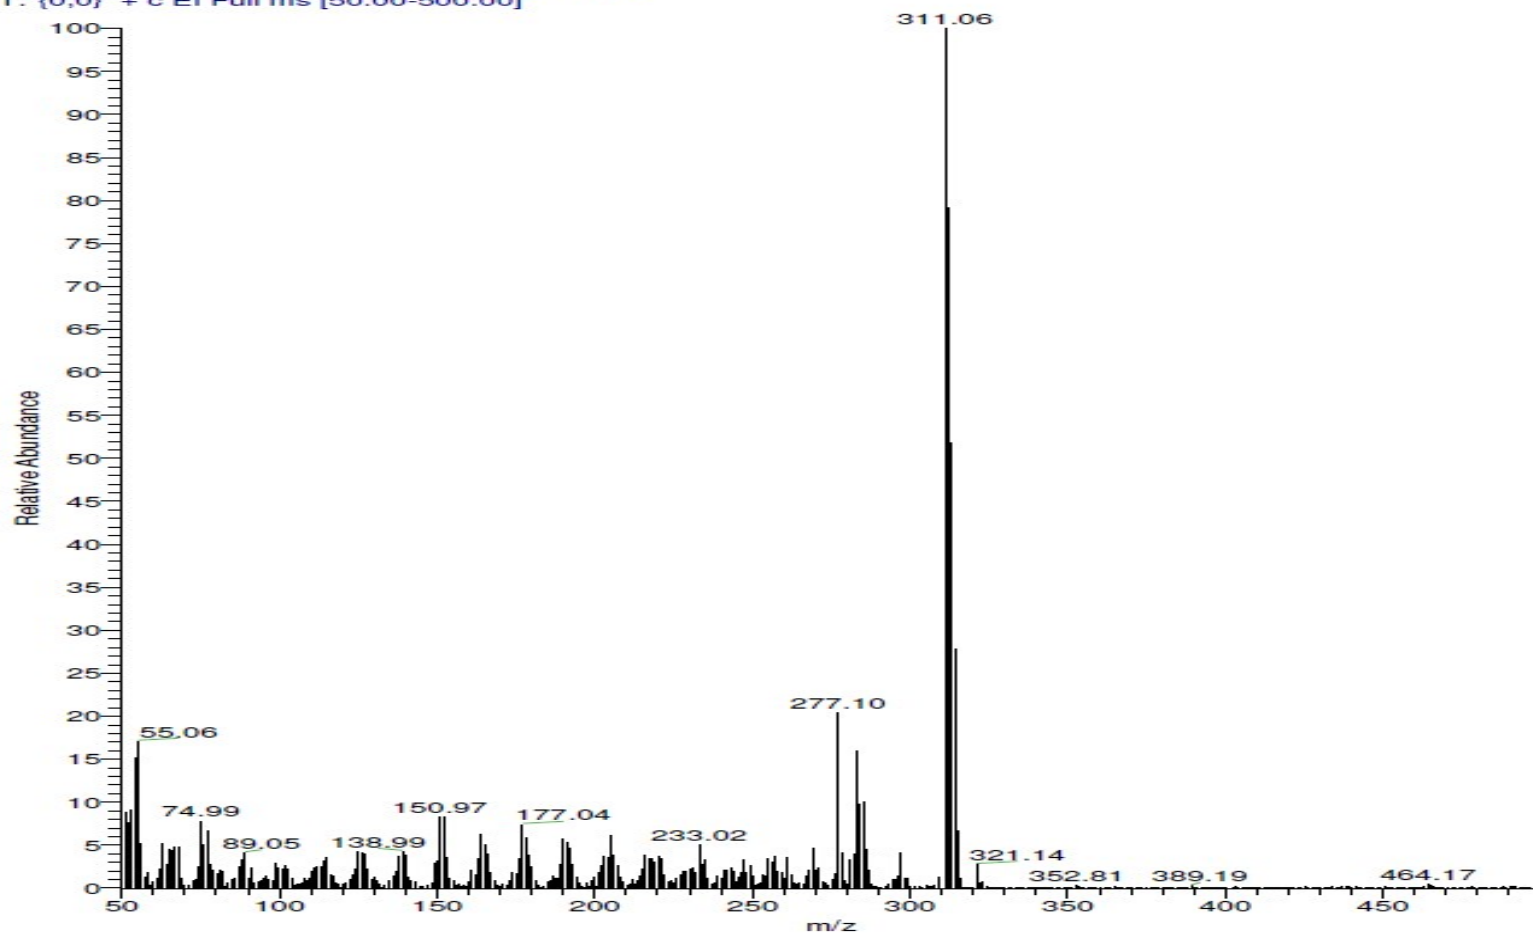

Fig. S28. Mass spectrum of compound 3g.



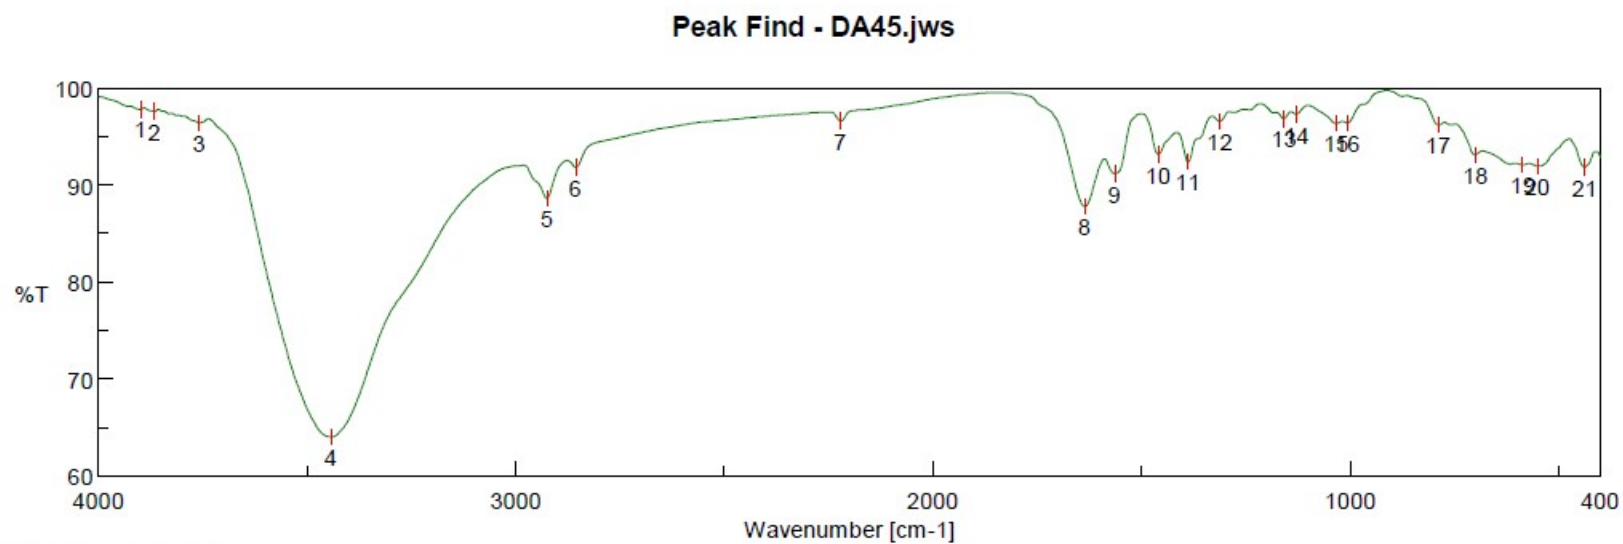

[ Result of Peak Picking ]

| No. | Position | Intensity |
|-----|----------|-----------|-----|----------|-----------|-----|----------|-----------|-----|----------|-----------|
| 1   | 3899.36  | 97.7987   | 2   | 3864.65  | 97.5661   | 3   | 3758.58  | 96.3737   | 4   | 3442.31  | 63.9729   |
| 5   | 2925.48  | 88.6056   | 6   | 2856.06  | 91.7969   | 7   | 2221.59  | 96.5837   | 8   | 1635.34  | 87.7782   |
| 9   | 1563.99  | 91.159    | 10  | 1459.85  | 93.1623   | 11  | 1388.5   | 92.3666   | 12  | 1313.29  | 96.5502   |
| 13  | 1159.01  | 96.831    | 14  | 1128.15  | 97.2734   | 15  | 1033.66  | 96.3203   | 16  | 1006.66  | 96.3928   |
| 17  | 788.743  | 96.1955   | 18  | 700.034  | 93.0945   | 19  | 586.254  | 92.0608   | 20  | 551.542  | 91.9394   |
| 21  | 437.762  | 91.8065   |     |          |           |     |          |           |     |          |           |

**Fig. S29.** IR spectrum of compound **3h** (KBr pellet).

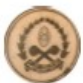

Dr\_AlaaEldinSrou-DA45

Dr\_AlaaEldinSrou-DA45

Sample Name **Dr\_AlaaEldinSrou-DA45**  
Date collected **2018-02-19**

Pulse sequence **PROTON**  
Solvent **CDCL3**

Temperature **25**  
Spectrometer **nmr400-mercury400**

Study owner **vnmr1**  
Operator **vnmr1**

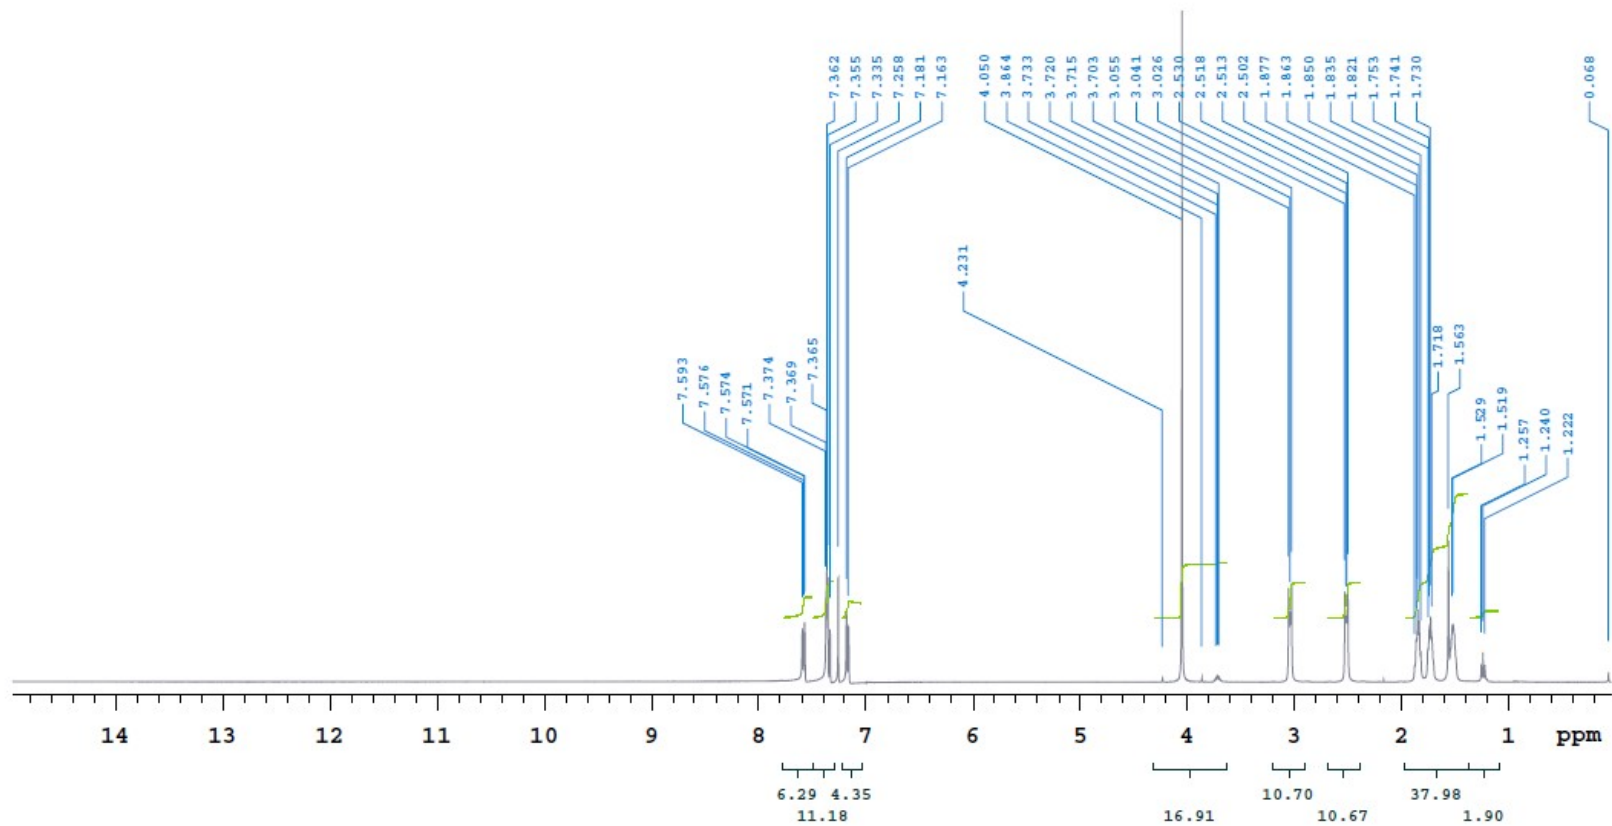

Fig. S30. <sup>1</sup>H-NMR spectrum of compound **3h**.

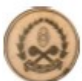

Dr\_AlaaEldinSrou-DA45

Dr\_AlaaEldinSrou-DA45

Sample Name Dr\_AlaaEldinSrou-DA45  
Date collected 2018-02-19

Pulse sequence CARBON  
Solvent CDCL3

Temperature 25  
Spectrometer nmr400-mercury400

Study owner vnmr1  
Operator vnmr1

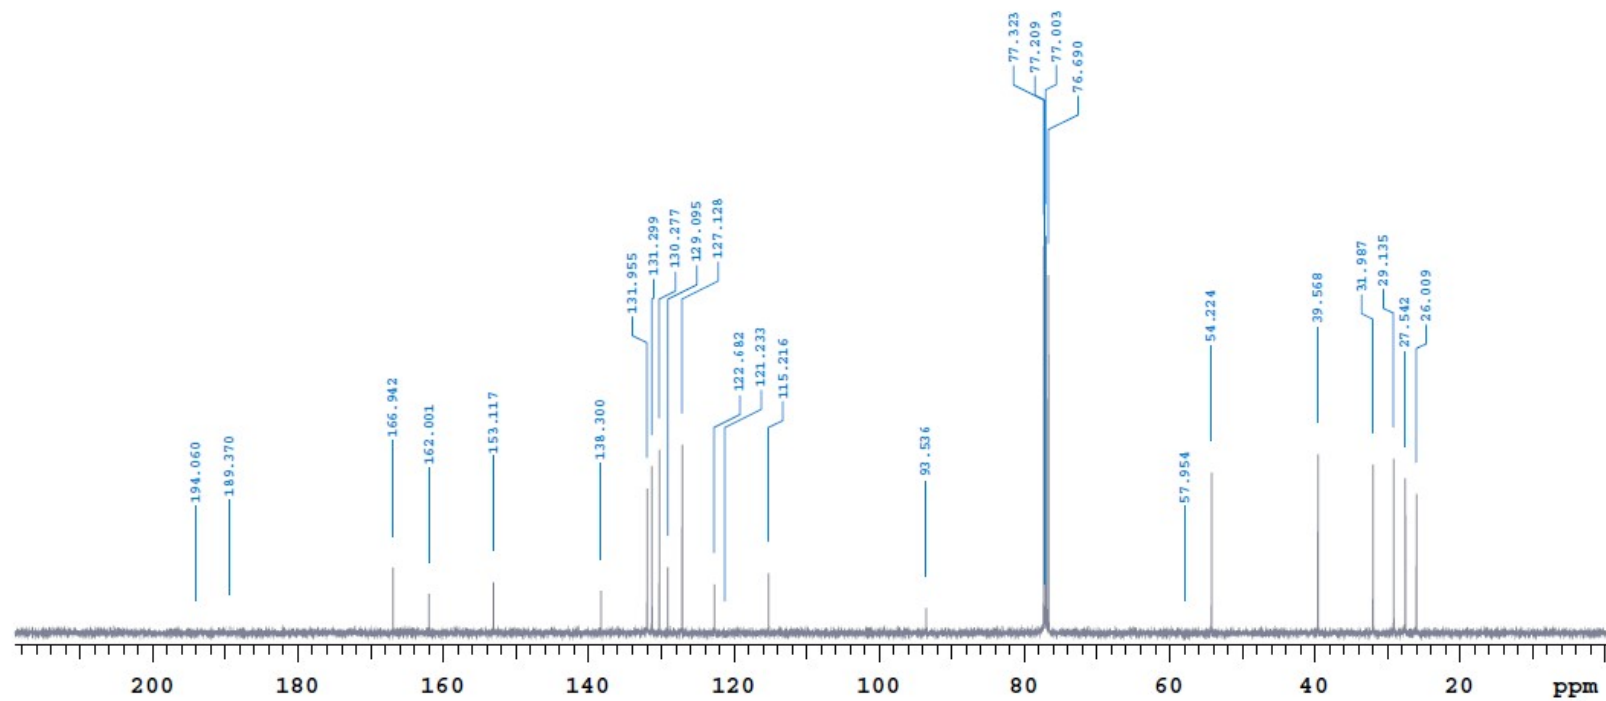

Fig. S31.  $^{13}\text{C}$ -NMR spectrum of compound **3h**.

DA45 #748 RT: 2.57 AV: 1 NL: 8.03E5  
T: {0,0} + c EI Full ms [50.00-500.00]

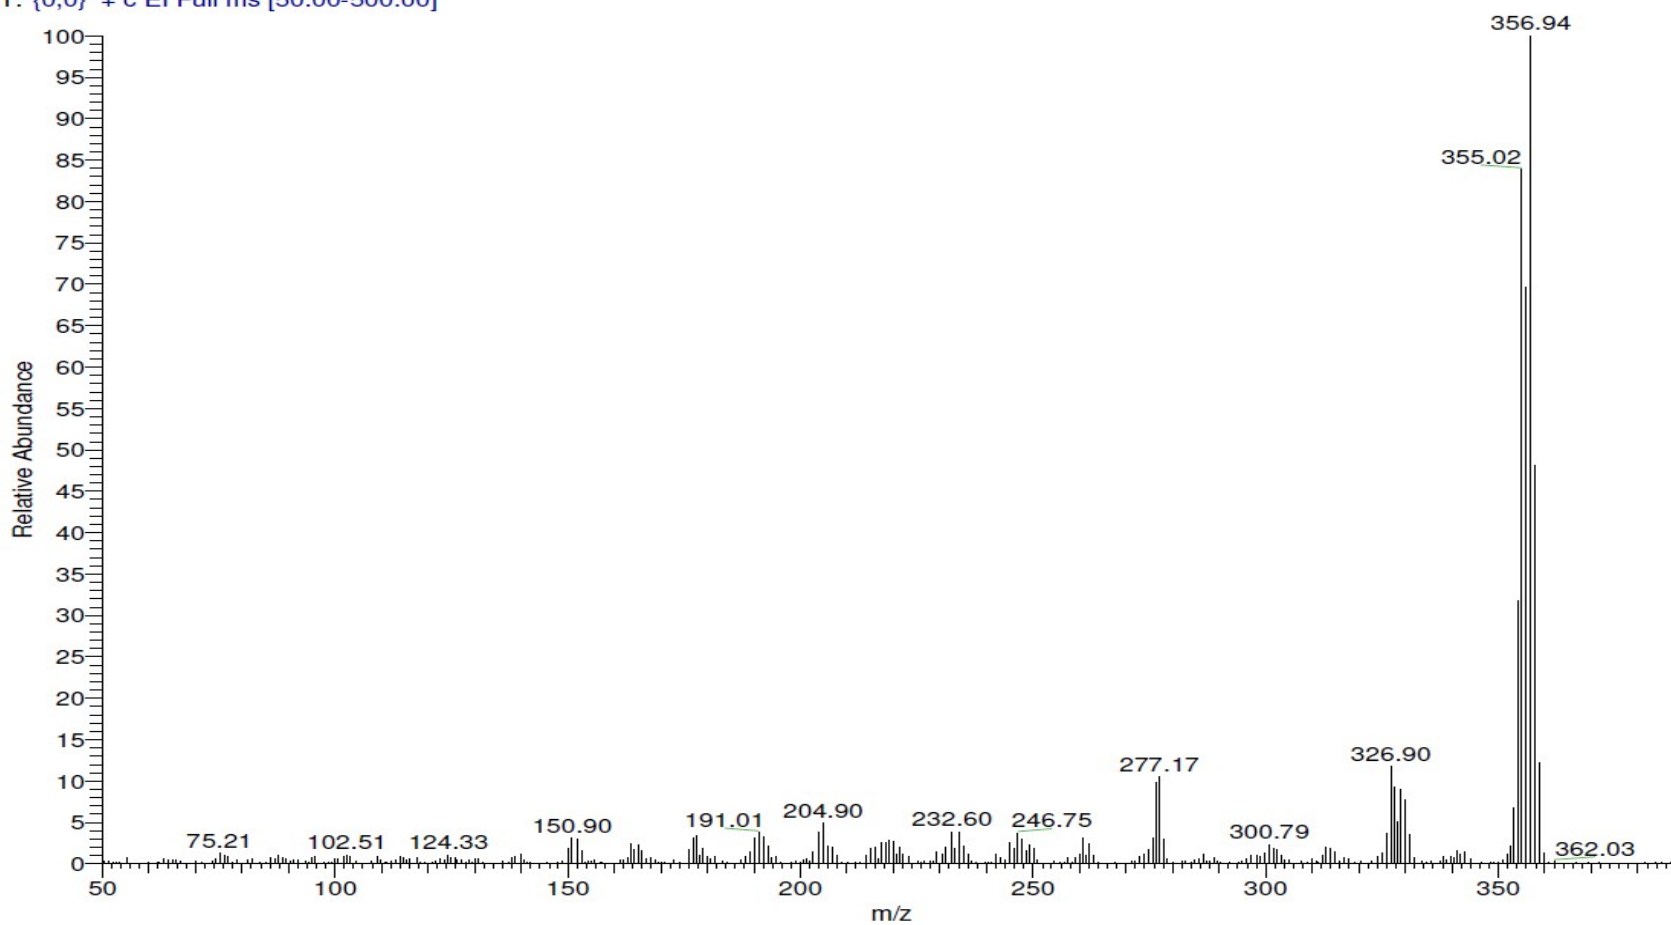

Fig. S32. Mass spectrum of compound 3h.

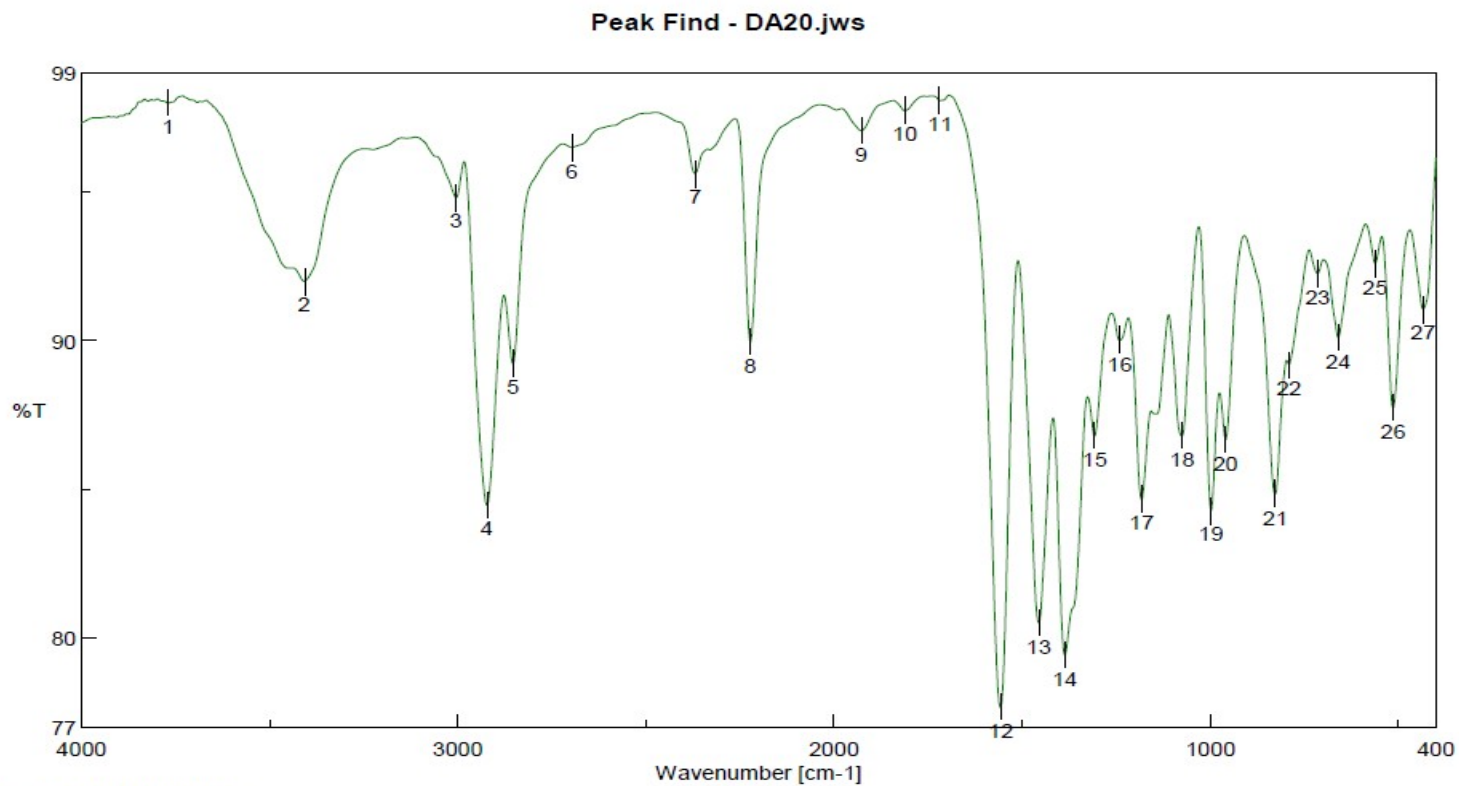

[ Result of Peak Picking ]

| No. | Position | Intensity |
|-----|----------|-----------|-----|----------|-----------|-----|----------|-----------|-----|----------|-----------|
| 1   | 3770.15  | 97.9866   | 2   | 3408.57  | 91.9936   | 3   | 3004.55  | 94.8054   | 4   | 2922.59  | 84.4686   |
| 5   | 2853.17  | 89.2255   | 6   | 2697.93  | 96.4971   | 7   | 2369.12  | 95.6231   | 8   | 2222.56  | 89.9538   |
| 9   | 1927.5   | 97.0597   | 10  | 1811.79  | 97.7274   | 11  | 1718.26  | 98.0631   | 12  | 1557.24  | 77.67     |
| 13  | 1455.99  | 80.5124   | 14  | 1386.57  | 79.4276   | 15  | 1307.5   | 86.7831   | 16  | 1240.97  | 90.0013   |
| 17  | 1182.15  | 84.6582   | 18  | 1075.12  | 86.7866   | 19  | 997.982  | 84.2855   | 20  | 959.412  | 86.6754   |
| 21  | 827.312  | 84.8343   | 22  | 790.671  | 89.1878   | 23  | 714.497  | 92.2491   | 24  | 659.536  | 90.0921   |
| 25  | 562.148  | 92.5971   | 26  | 513.936  | 87.7294   | 27  | 433.905  | 91.048    |     |          |           |

**Fig. S33.** IR spectrum of compound **3i** (KBr pellet).

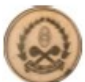

Dr\_ZaneebNovel-20

Dr\_ZaneebNovel-20

Sample Name Dr\_ZaneebNovel-20  
Date collected 2017-04-27

Pulse sequence PROTON  
Solvent cdcl3

Temperature 25  
Spectrometer nmr400-mercury400

Study owner vnmr1  
Operator vnmr1

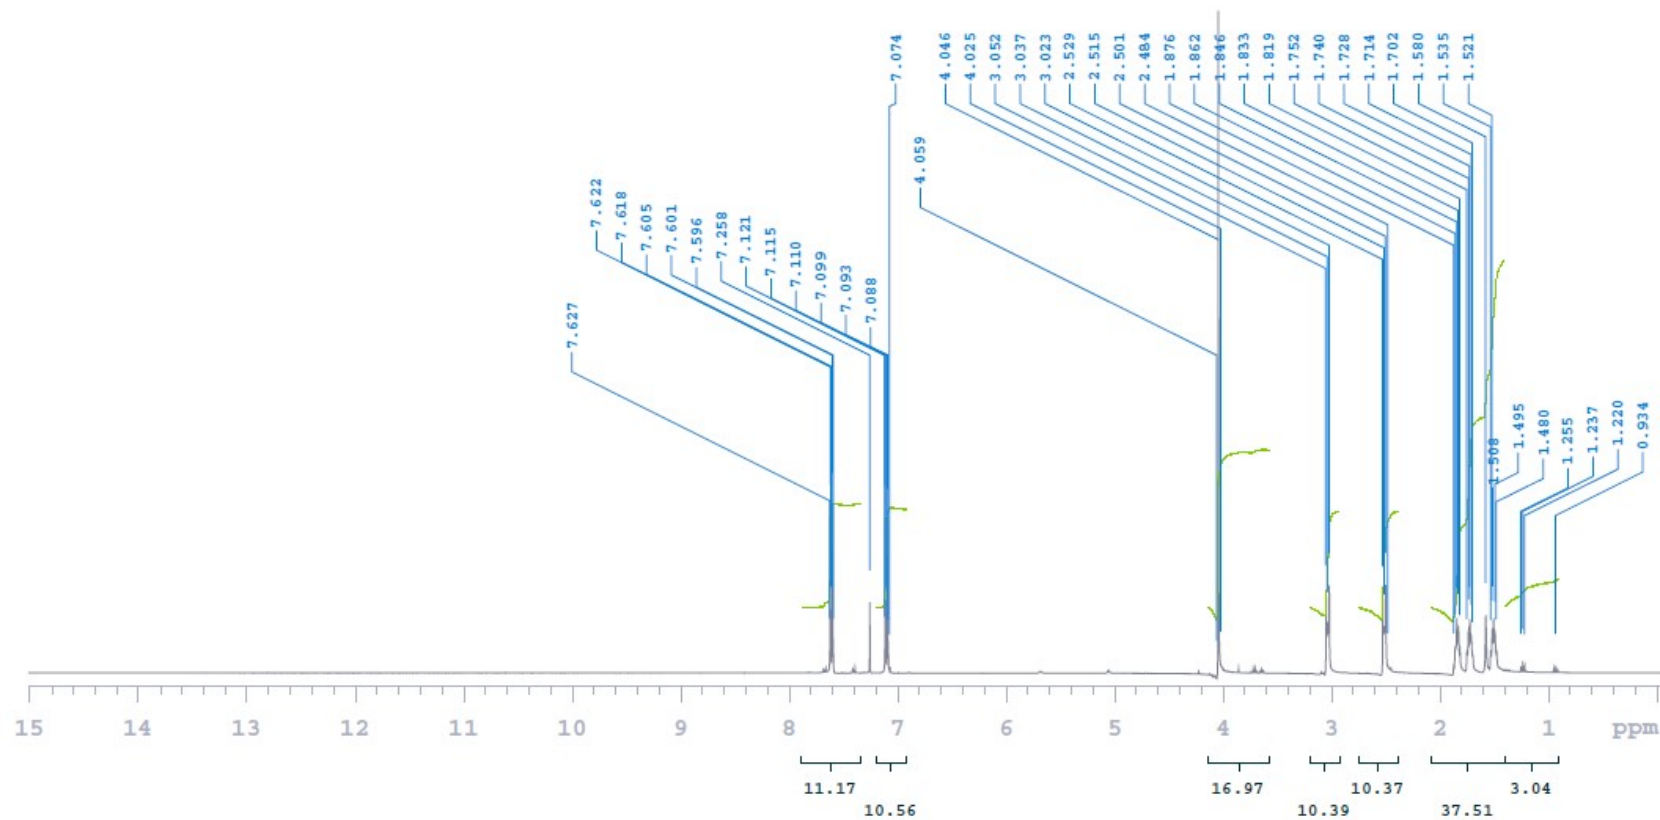

Fig. S34. <sup>1</sup>H-NMR spectrum of compound 3i.

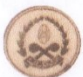

Dr-AlaaSeror-DA20

Dr-AlaaSeror-DA20

Sample Name **Dr-AlaaSeror-DA20**  
Date collected **2017-11-23**

Pulse sequence **CARBON**  
Solvent **cdcl3**

Temperature **25**  
Spectrometer **nmr400-mercury400**

Study owner **vnmr1**  
Operator **vnmr1**

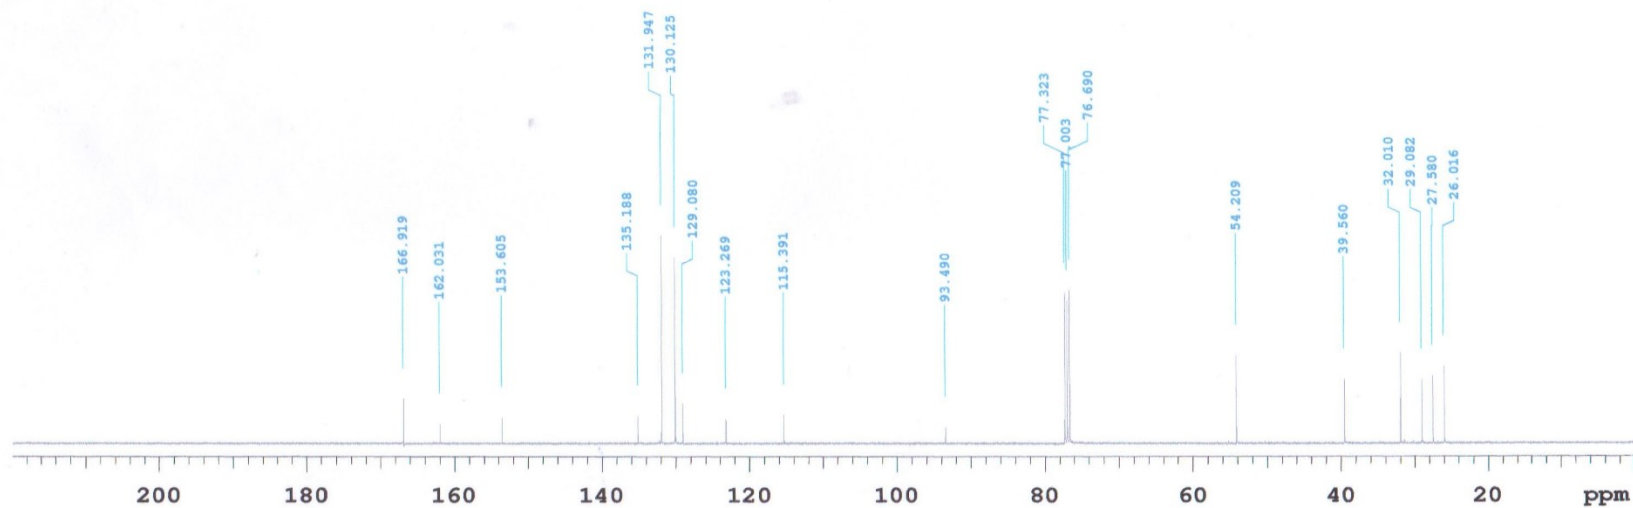

Fig. S35.  $^{13}\text{C}$ -NMR spectrum of compound **3i**.

Alaa-DA20 #727 RT: 2.50 AV: 1 NL: 8.67E4  
T: {0,0} + c EI Full ms [50.00-500.00]

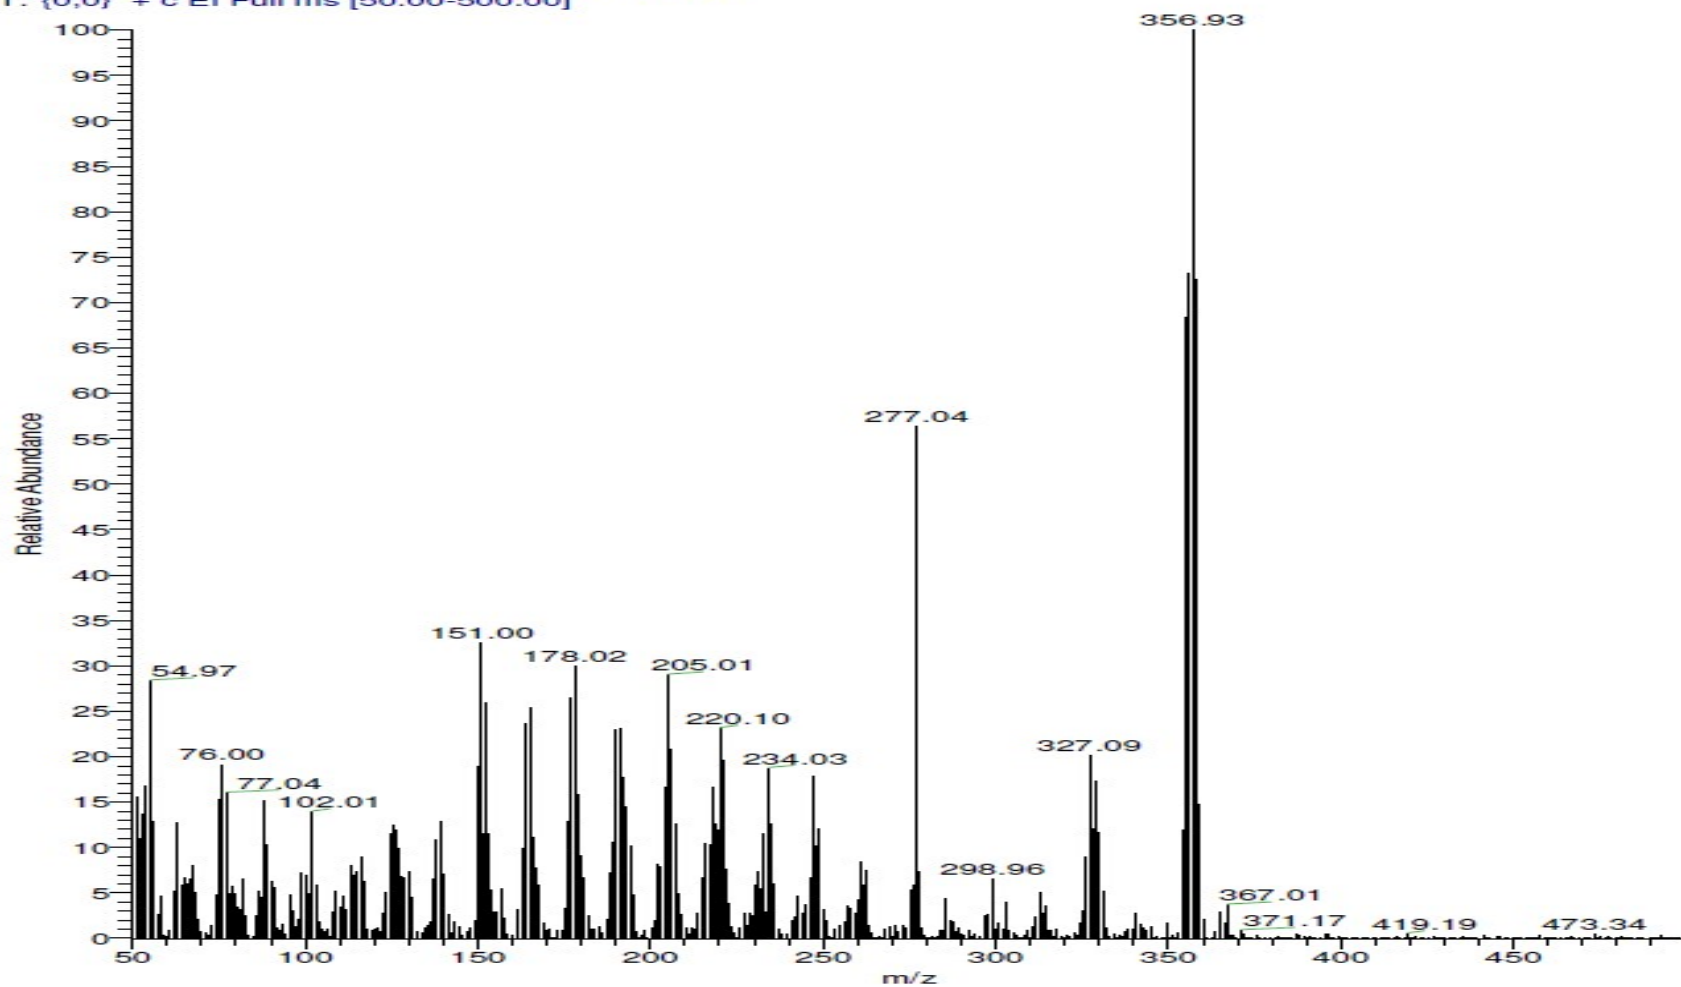

Fig. S36. Mass spectrum of compound 3i.



Peak Find - DA43.jws

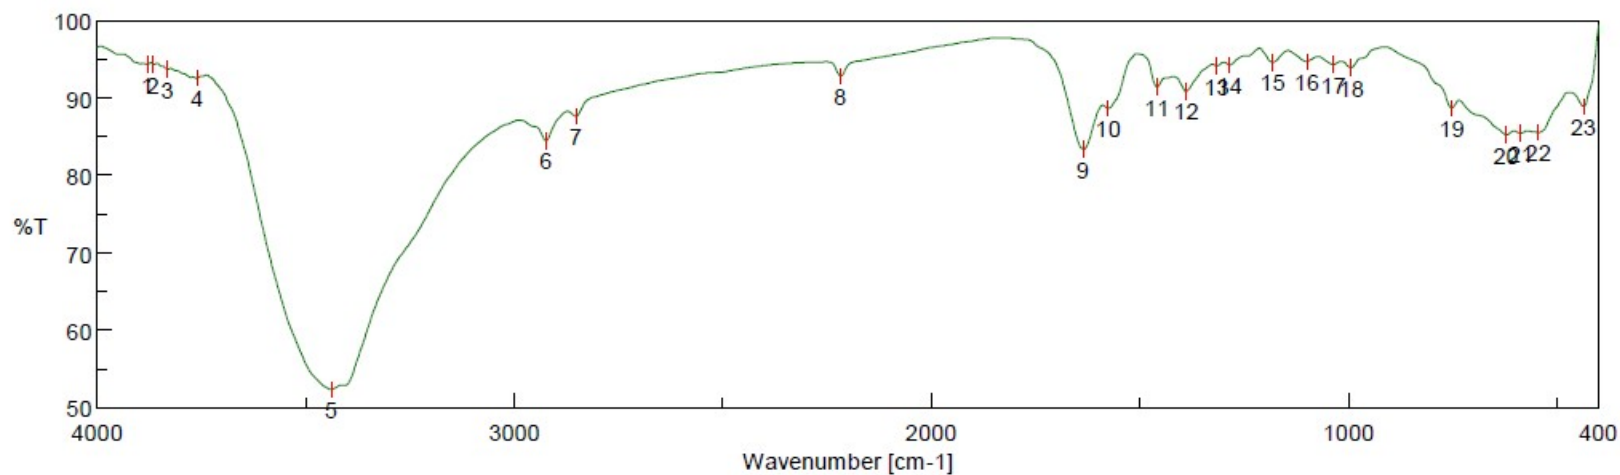

[ Result of Peak Picking ]

| No. | Position | Intensity |
|-----|----------|-----------|-----|----------|-----------|-----|----------|-----------|-----|----------|-----------|
| 1   | 3880.08  | 94.3346   | 2   | 3864.65  | 94.3254   | 3   | 3831.86  | 93.7073   | 4   | 3760.51  | 92.498    |
| 5   | 3438.46  | 52.3201   | 6   | 2923.56  | 84.4766   | 7   | 2852.2   | 87.6113   | 8   | 2217.74  | 92.8349   |
| 9   | 1635.34  | 83.3429   | 10  | 1575.56  | 88.6322   | 11  | 1457.92  | 91.4122   | 12  | 1388.5   | 90.8307   |
| 13  | 1315.21  | 94.1082   | 14  | 1284.36  | 94.2627   | 15  | 1182.15  | 94.5749   | 16  | 1099.23  | 94.6607   |
| 17  | 1035.59  | 94.3143   | 18  | 993.16   | 93.9012   | 19  | 752.102  | 88.6809   | 20  | 620.966  | 85.2241   |
| 21  | 586.254  | 85.4394   | 22  | 543.828  | 85.5131   | 23  | 435.834  | 88.9224   |     |          |           |

Fig. S37. IR spectrum of compound **3j** (KBr pellet).

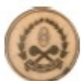

Dr\_AlaaEldinSrou-DA43

Dr\_AlaaEldinSrou-DA43

Sample Name Dr\_AlaaEldinSrou-DA43  
Date collected 2018-02-13

Pulse sequence PROTON  
Solvent CDCL3

Temperature 25  
Spectrometer nmr400-mercury400

Study owner vnmr1  
Operator vnmr1

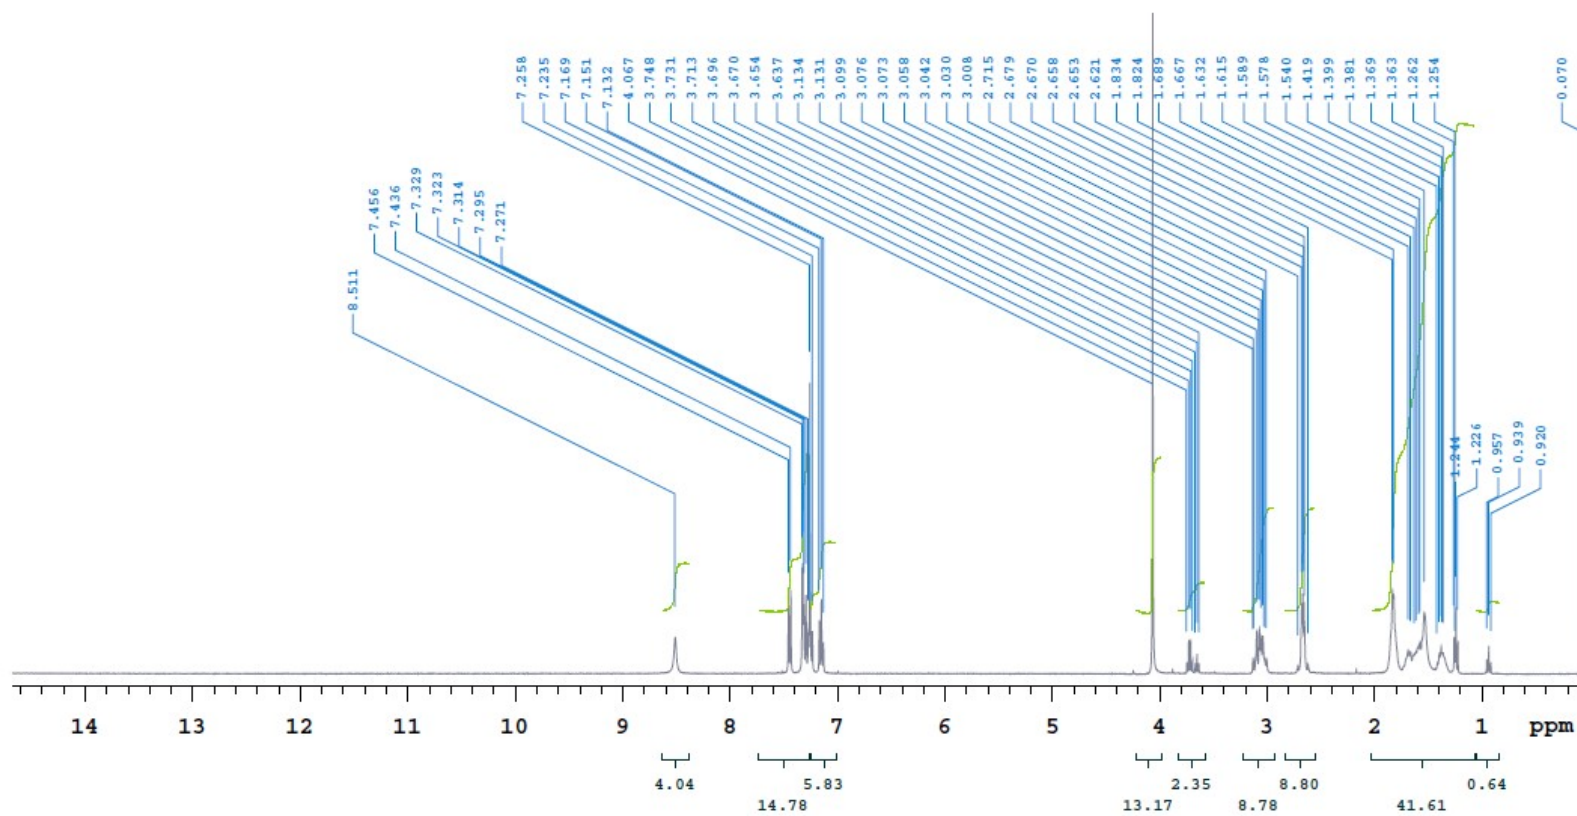

Fig. S38. <sup>1</sup>H-NMR spectrum of compound 3j.

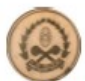

Dr\_AlaaEldinSrouer-DA43

Dr\_AlaaEldinSrouer-DA43

Sample Name Dr\_AlaaEldinSrouer-DA43  
Date collected 2018-02-13

Pulse sequence CARBON  
Solvent CDCL3

Temperature 25  
Spectrometer nmr400-mercury400

Study owner vnmr1  
Operator vnmr1

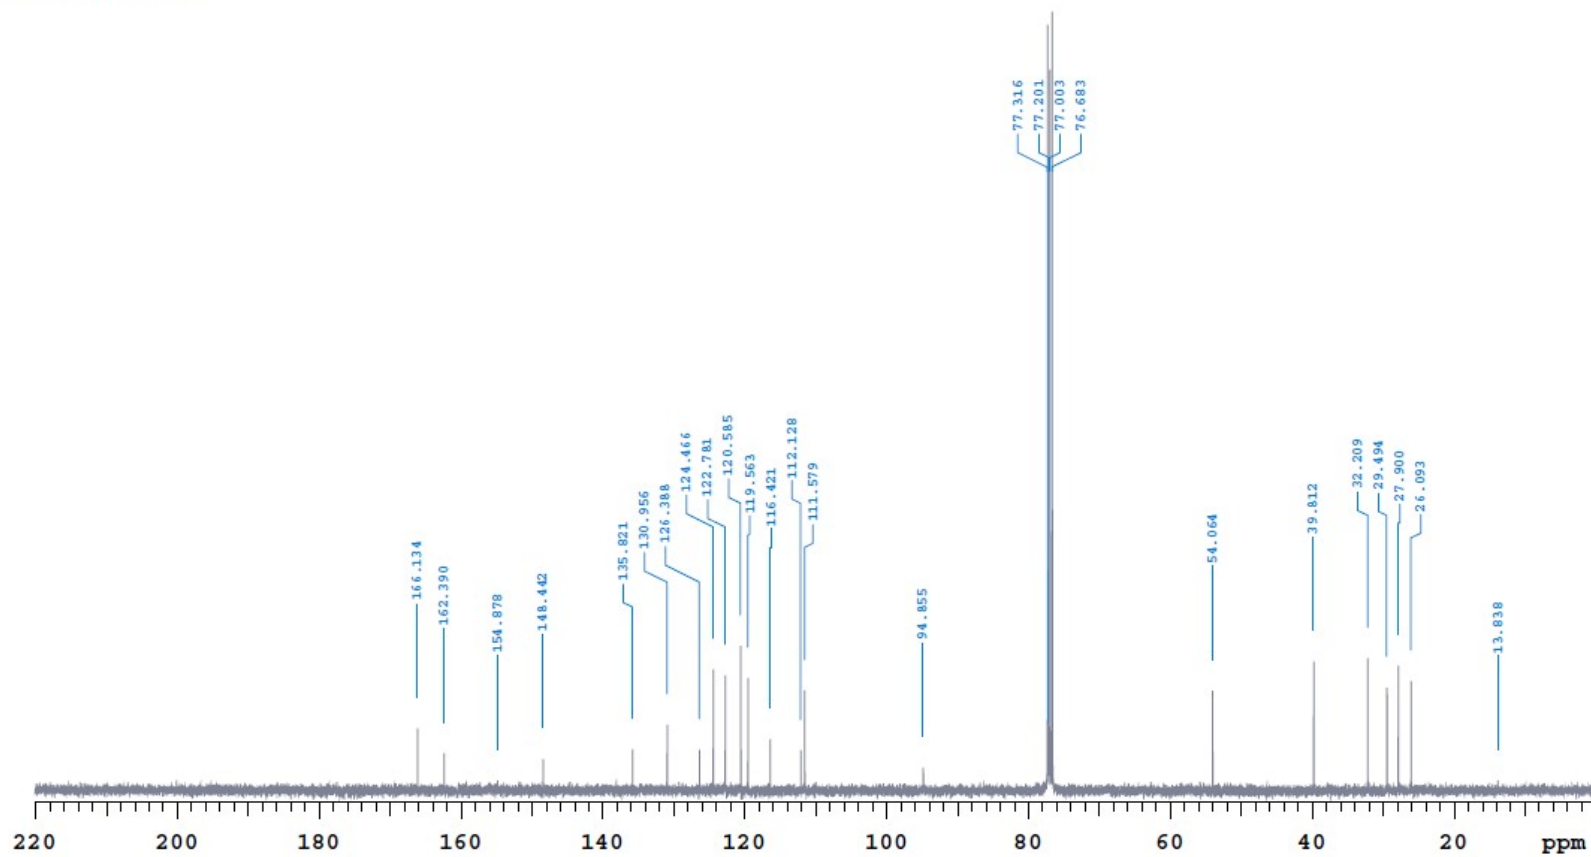

Fig. S39.  $^{13}\text{C}$ -NMR spectrum of compound 3j.

DA43 #1040 RT: 3.57 AV: 1 NL: 5.10E5  
T: {0,0} + c EI Full ms [50.00-500.00]

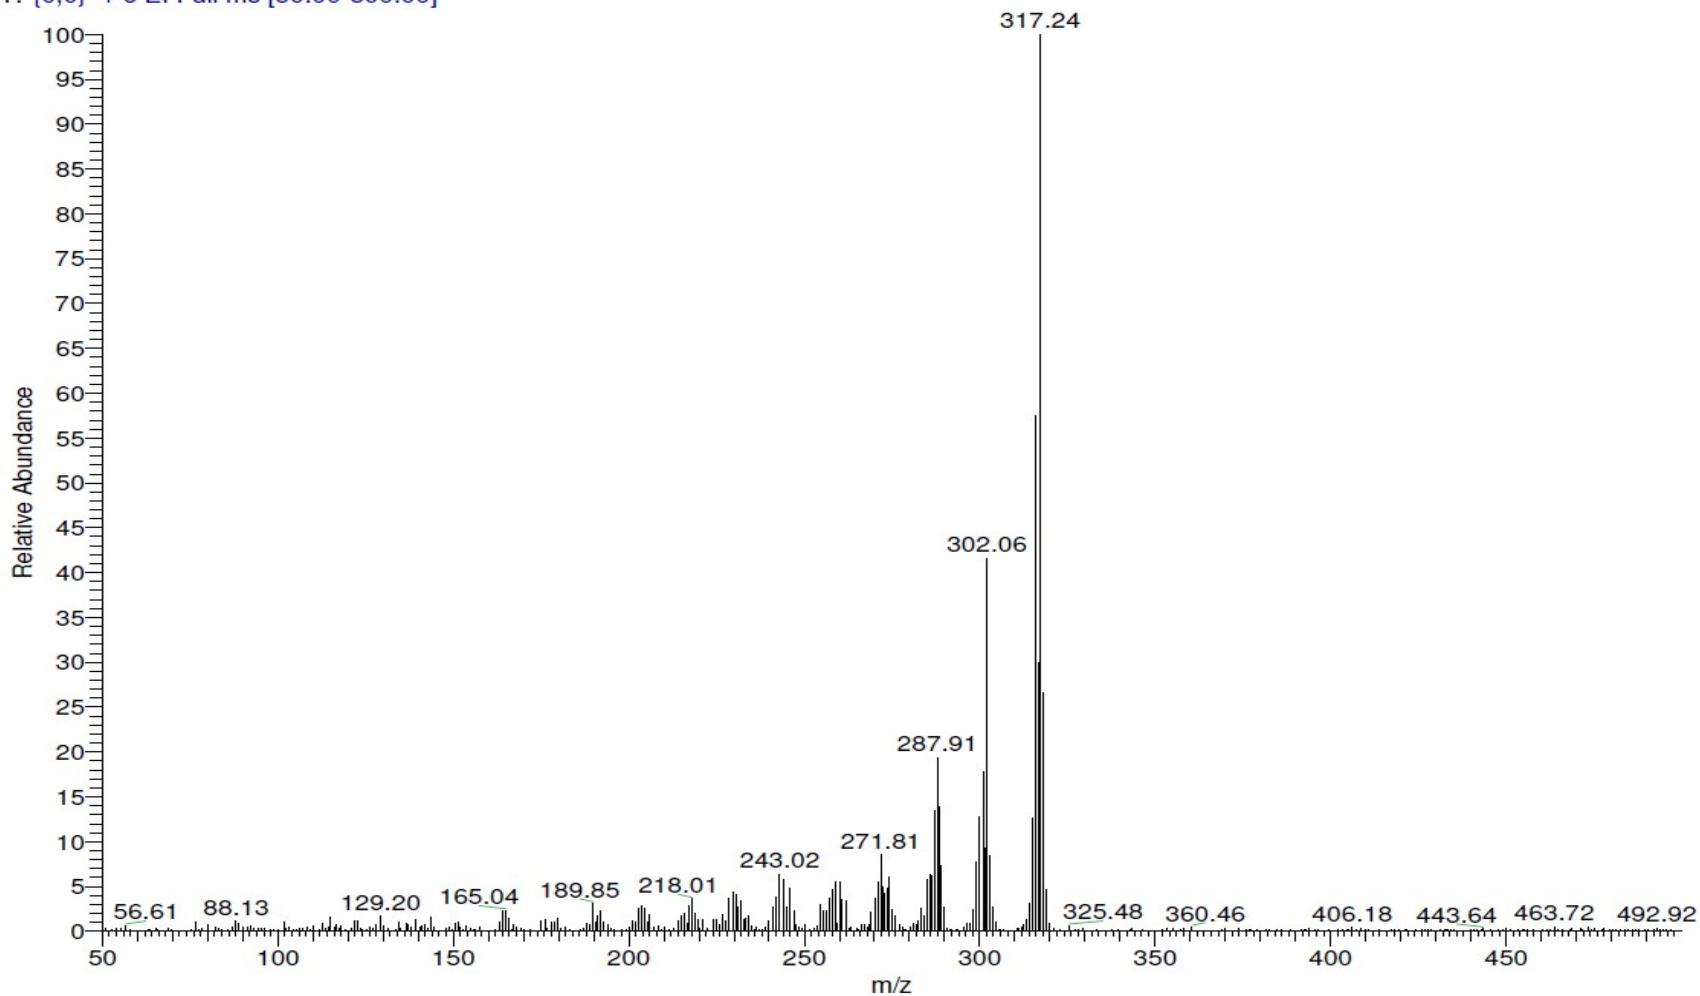

Fig. S40. Mass spectrum of compound 3j.

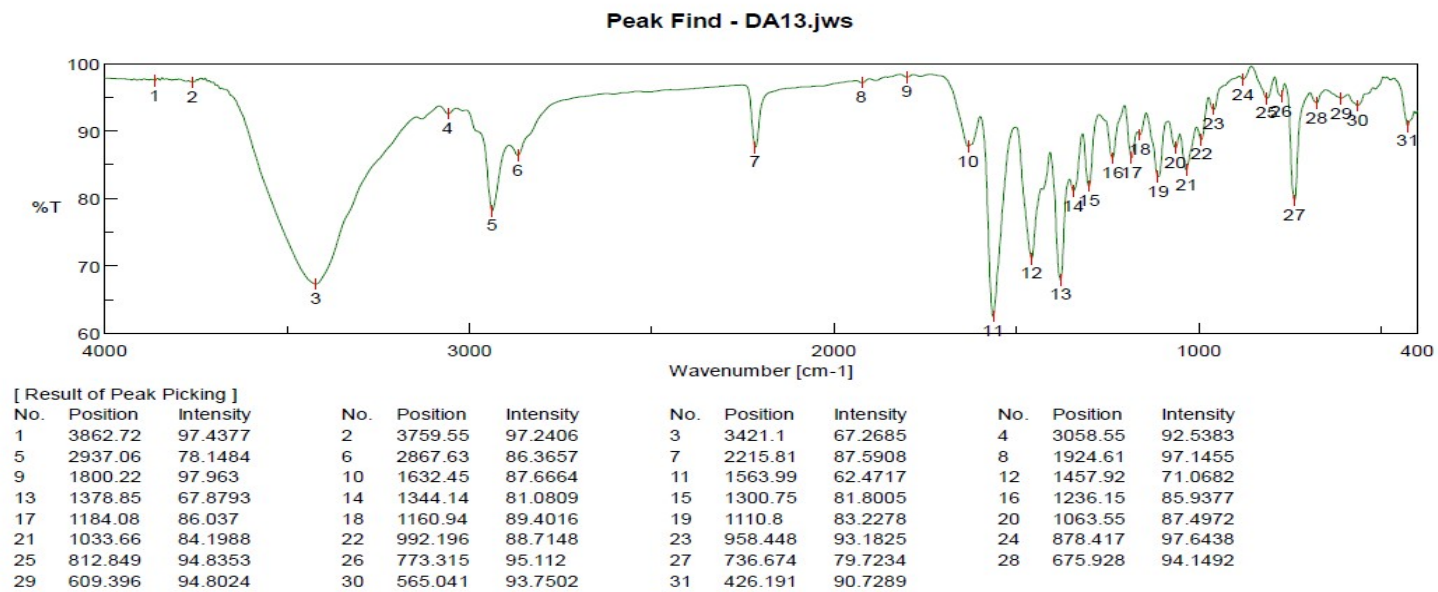

**Fig. S41.** IR spectrum of compound **3k** (KBr pellet).

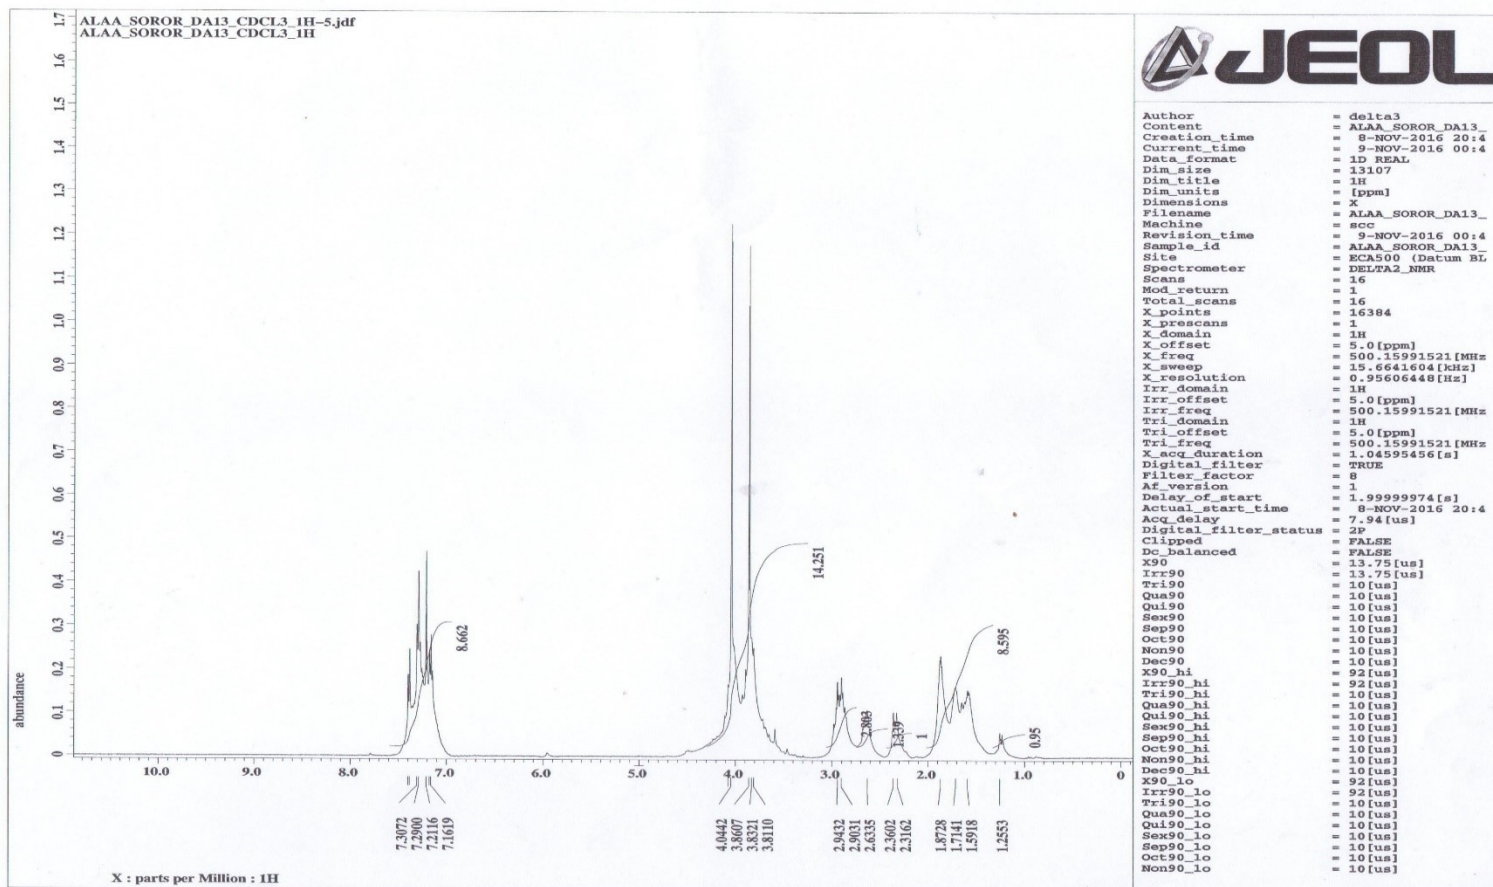

Fig. S42. <sup>1</sup>H-NMR spectrum of compound 3k.

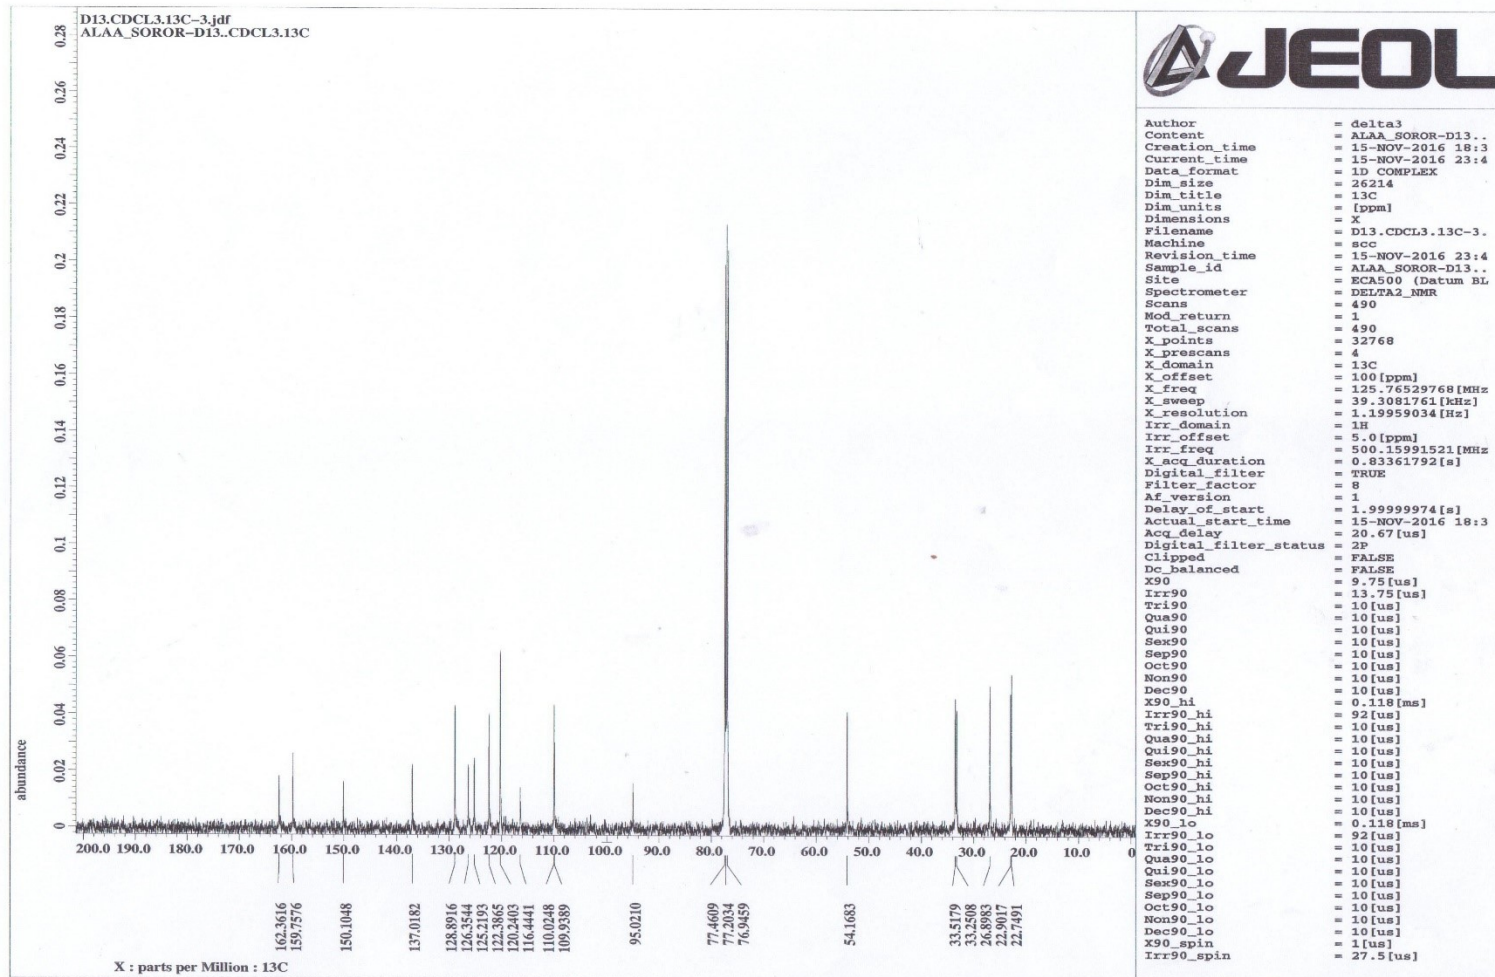

Fig. S43.  $^{13}\text{C}$ -NMR spectrum of compound **3k**.

Alaa-DA13 #843 RT: 2.90 AV: 1 NL: 8.42E6  
T: {0,0} + c EI Full ms [50.00-500.00]

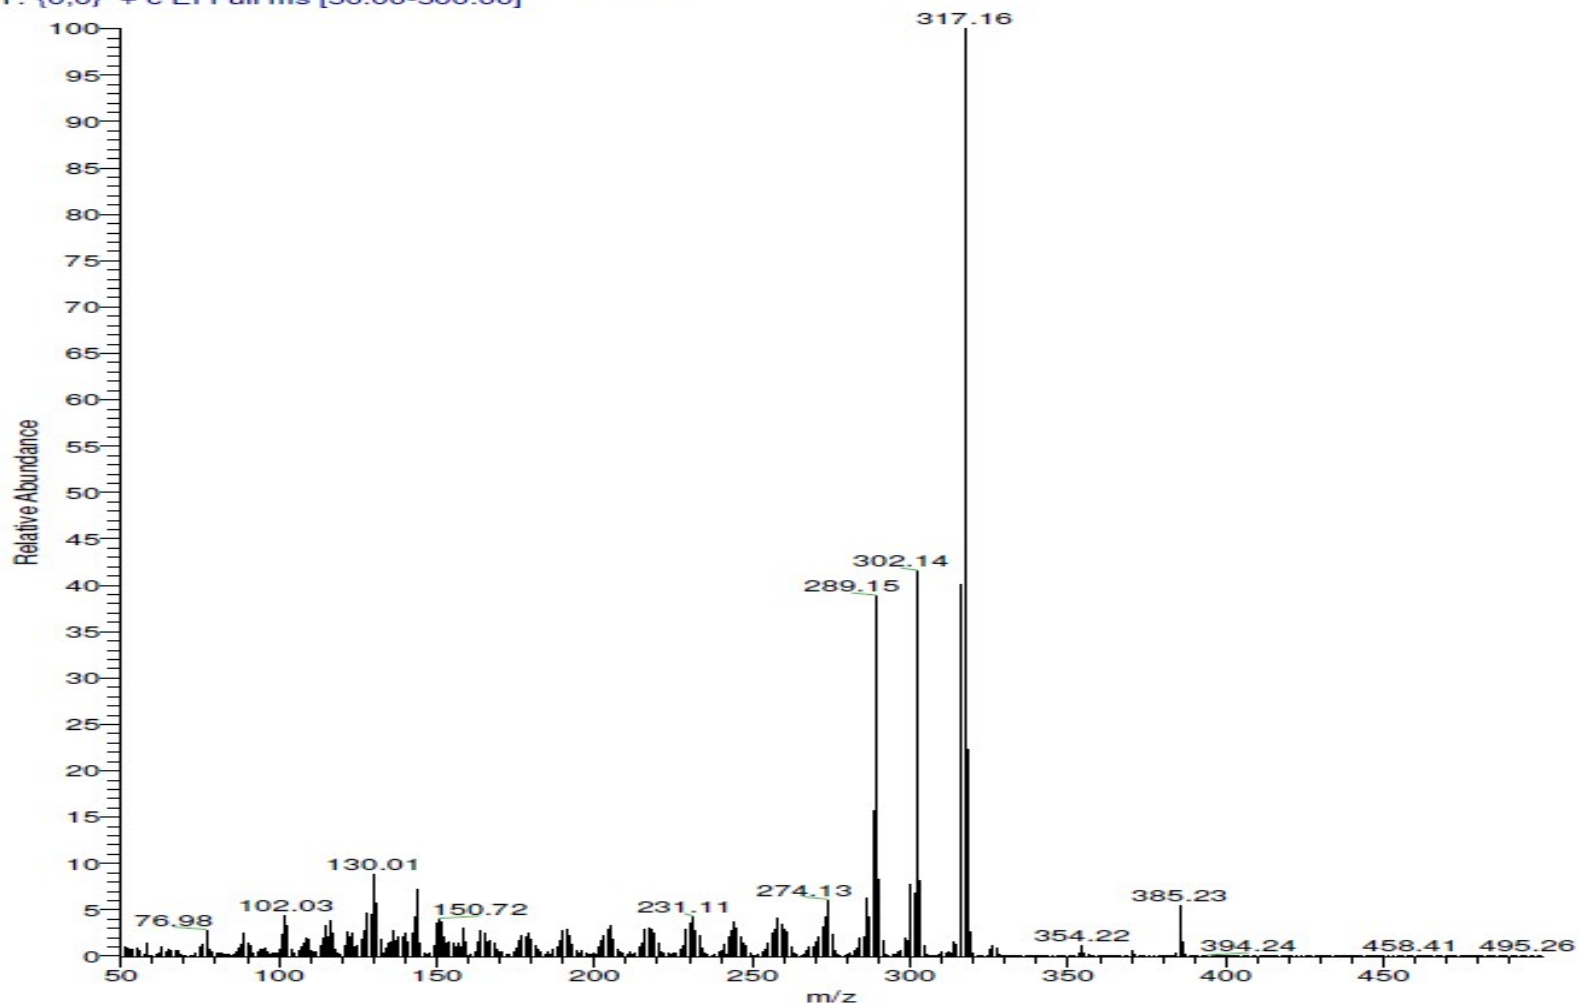

Fig. S44. Mass spectrum of compound 3k.



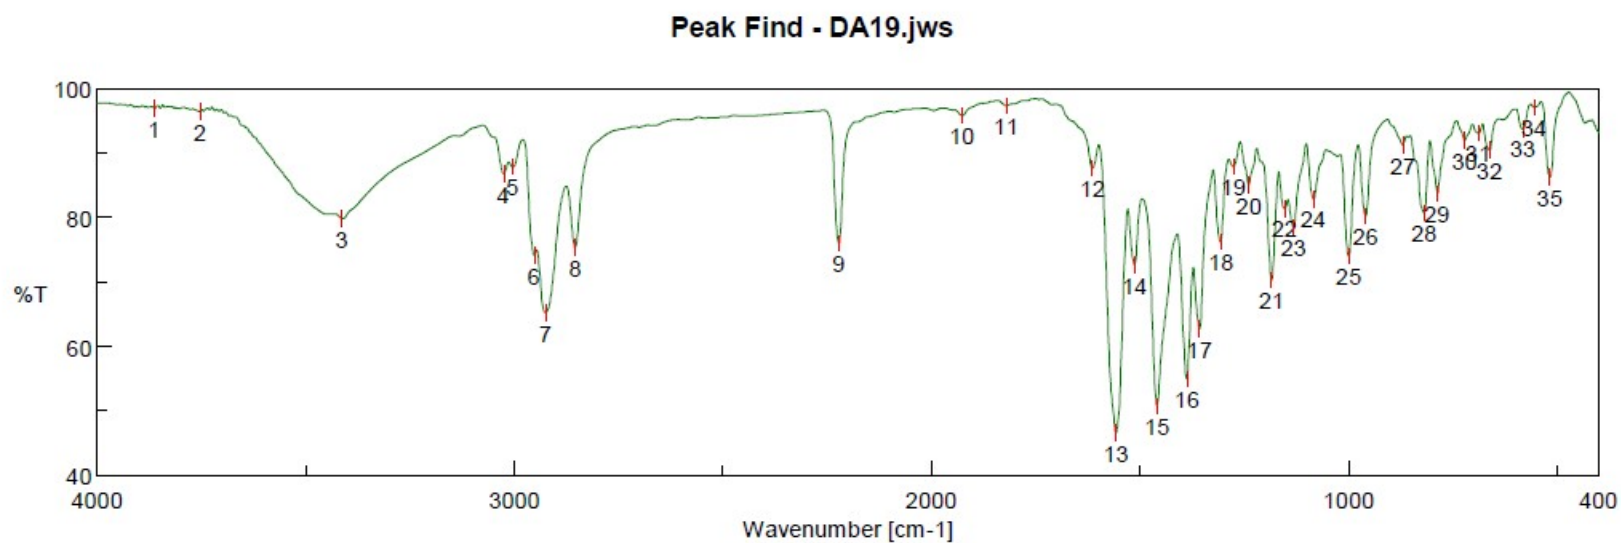

[ Result of Peak Picking ]

| No. | Position | Intensity |
|-----|----------|-----------|-----|----------|-----------|-----|----------|-----------|-----|----------|-----------|
| 1   | 3862.72  | 96.8456   | 2   | 3753.76  | 96.348    | 3   | 3412.42  | 79.8083   | 4   | 3025.76  | 86.7409   |
| 5   | 3003.59  | 87.7712   | 6   | 2952.48  | 74.1214   | 7   | 2925.48  | 65.2341   | 8   | 2854.13  | 75.3186   |
| 9   | 2221.59  | 75.9331   | 10  | 1926.54  | 95.7912   | 11  | 1820.47  | 97.309    | 12  | 1614.13  | 87.6203   |
| 13  | 1557.24  | 46.6109   | 14  | 1512.88  | 72.621    | 15  | 1458.89  | 50.7286   | 16  | 1387.53  | 54.94     |
| 17  | 1356.68  | 62.6757   | 18  | 1306.54  | 76.1939   | 19  | 1276.65  | 87.8667   | 20  | 1239.04  | 85.0329   |
| 21  | 1184.08  | 70.2193   | 22  | 1153.22  | 81.3172   | 23  | 1132.01  | 78.4503   | 24  | 1083.8   | 82.8254   |
| 25  | 999.91   | 73.9312   | 26  | 958.448  | 80.1968   | 27  | 869.739  | 91.1954   | 28  | 818.634  | 80.6971   |
| 29  | 786.815  | 83.6782   | 30  | 721.247  | 91.9305   | 31  | 688.463  | 93.0484   | 32  | 661.464  | 90.3985   |
| 33  | 582.397  | 93.7241   | 34  | 554.434  | 97.045    | 35  | 516.829  | 86.273    |     |          |           |

**Fig. S45.** IR spectrum of compound **31** (KBr pellet).

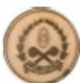

Dr\_ZaneebNovel-19

Dr\_ZaneebNovel-19

Sample Name Dr\_ZaneebNovel-19  
Date collected 2017-04-27

Pulse sequence PROTON  
Solvent cdcl3

Temperature 25  
Spectrometer nmr400-mercury400

Study owner vnmr1  
Operator vnmr1

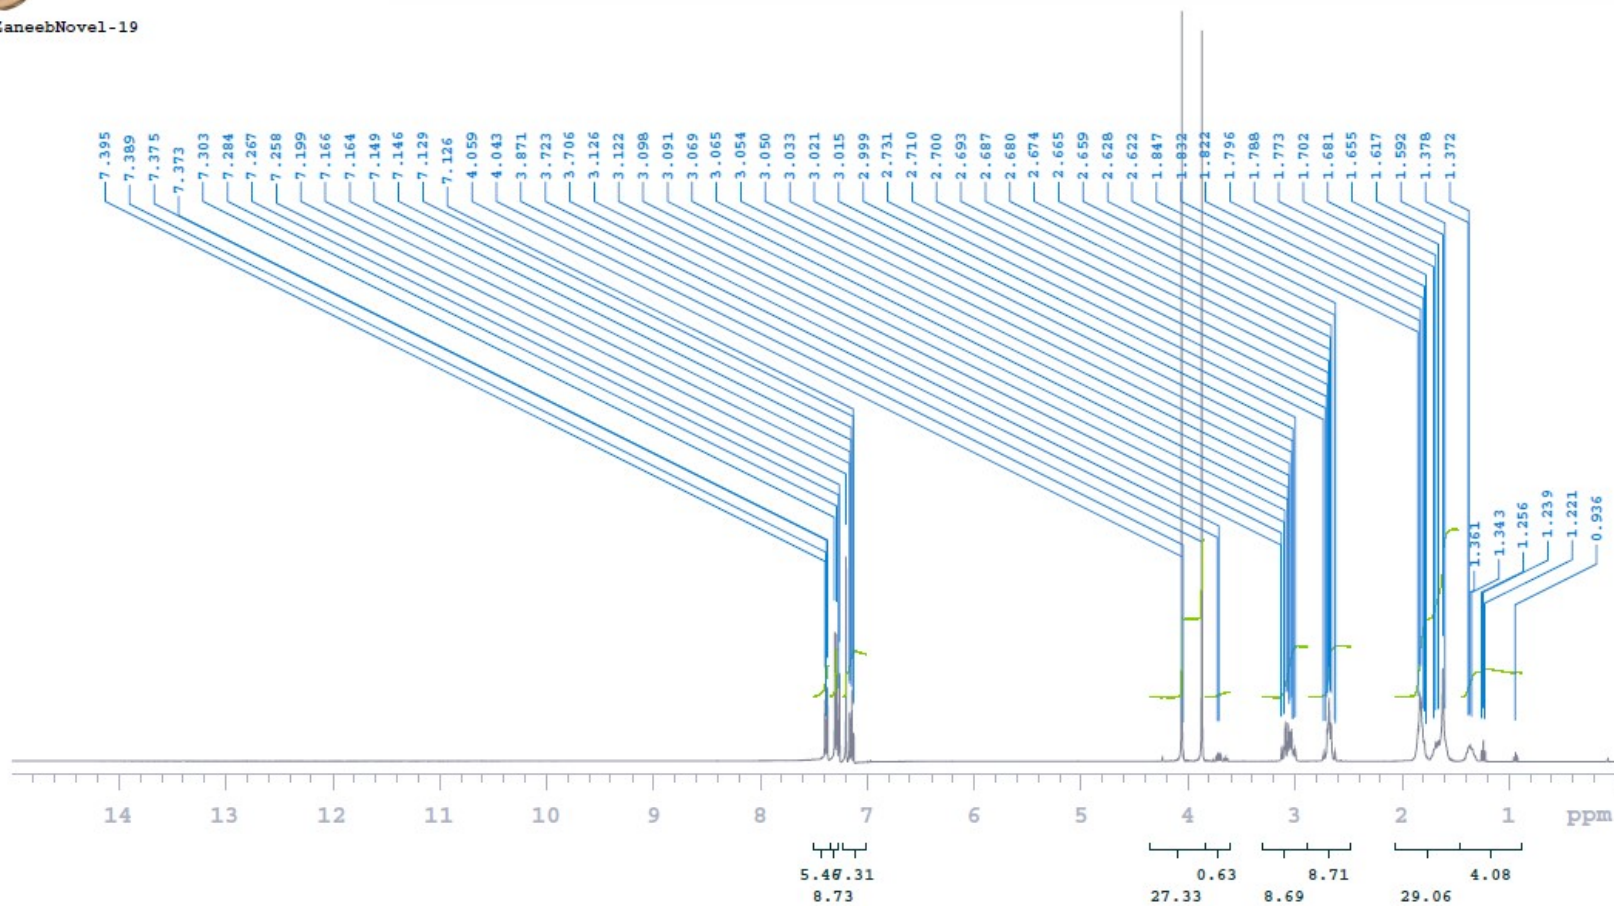

Fig. S46. <sup>1</sup>H-NMR spectrum of compound 31.

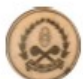

Dr\_ZaneebNovel-DA19

Dr\_ZaneebNovel-DA19

Sample Name Dr\_ZaneebNovel-DA19  
Date collected 2017-08-04

Pulse sequence CARBON  
Solvent cdcl3

Temperature 25  
Spectrometer nmr400-mercury400

Study owner vnmr1  
Operator vnmr1

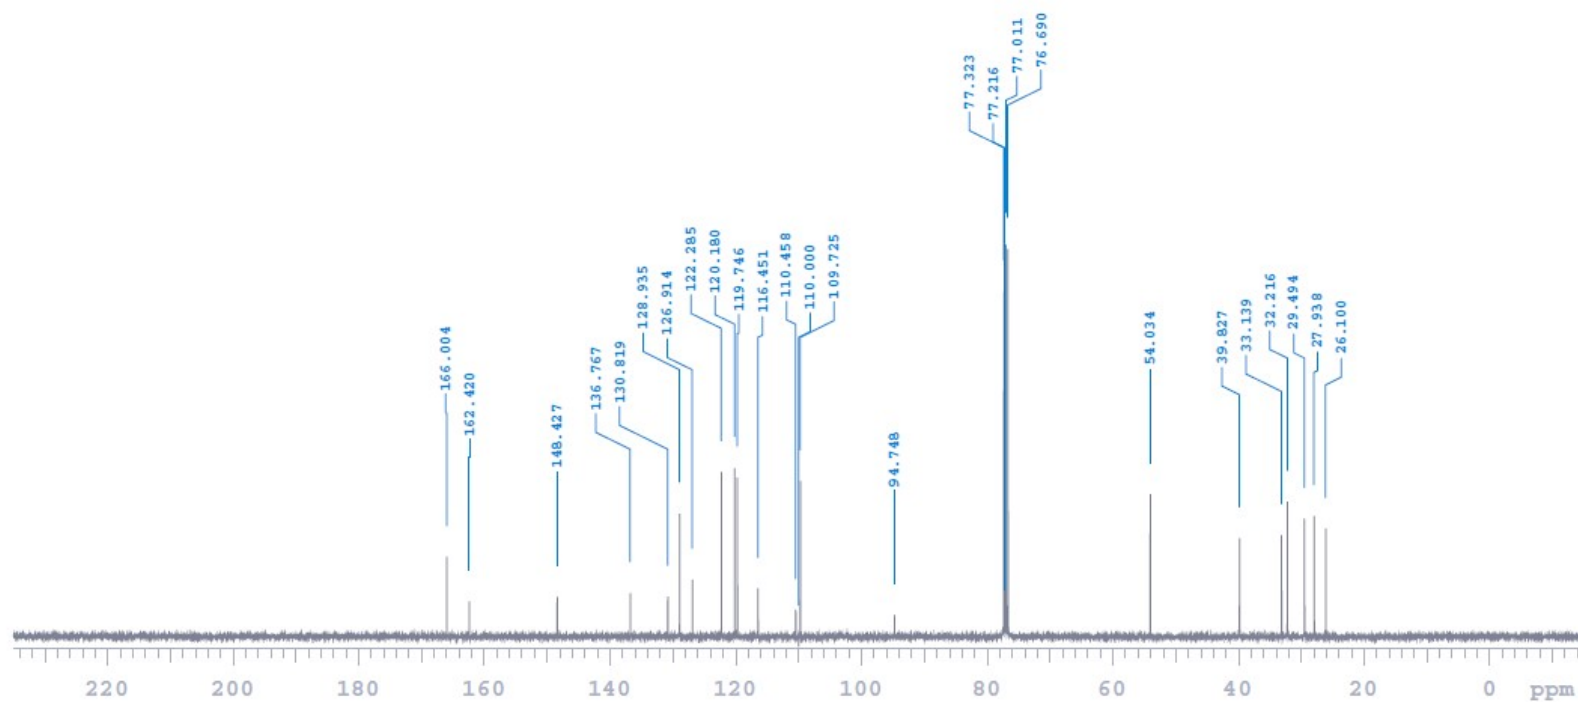

Fig. S47.  $^{13}\text{C}$ -NMR spectrum of compound 31.

Alaa-DA19 #646 RT: 2.23 AV: 1 NL: 1.24E6  
T: {0,0} + c EI Full ms [50.00-500.00]

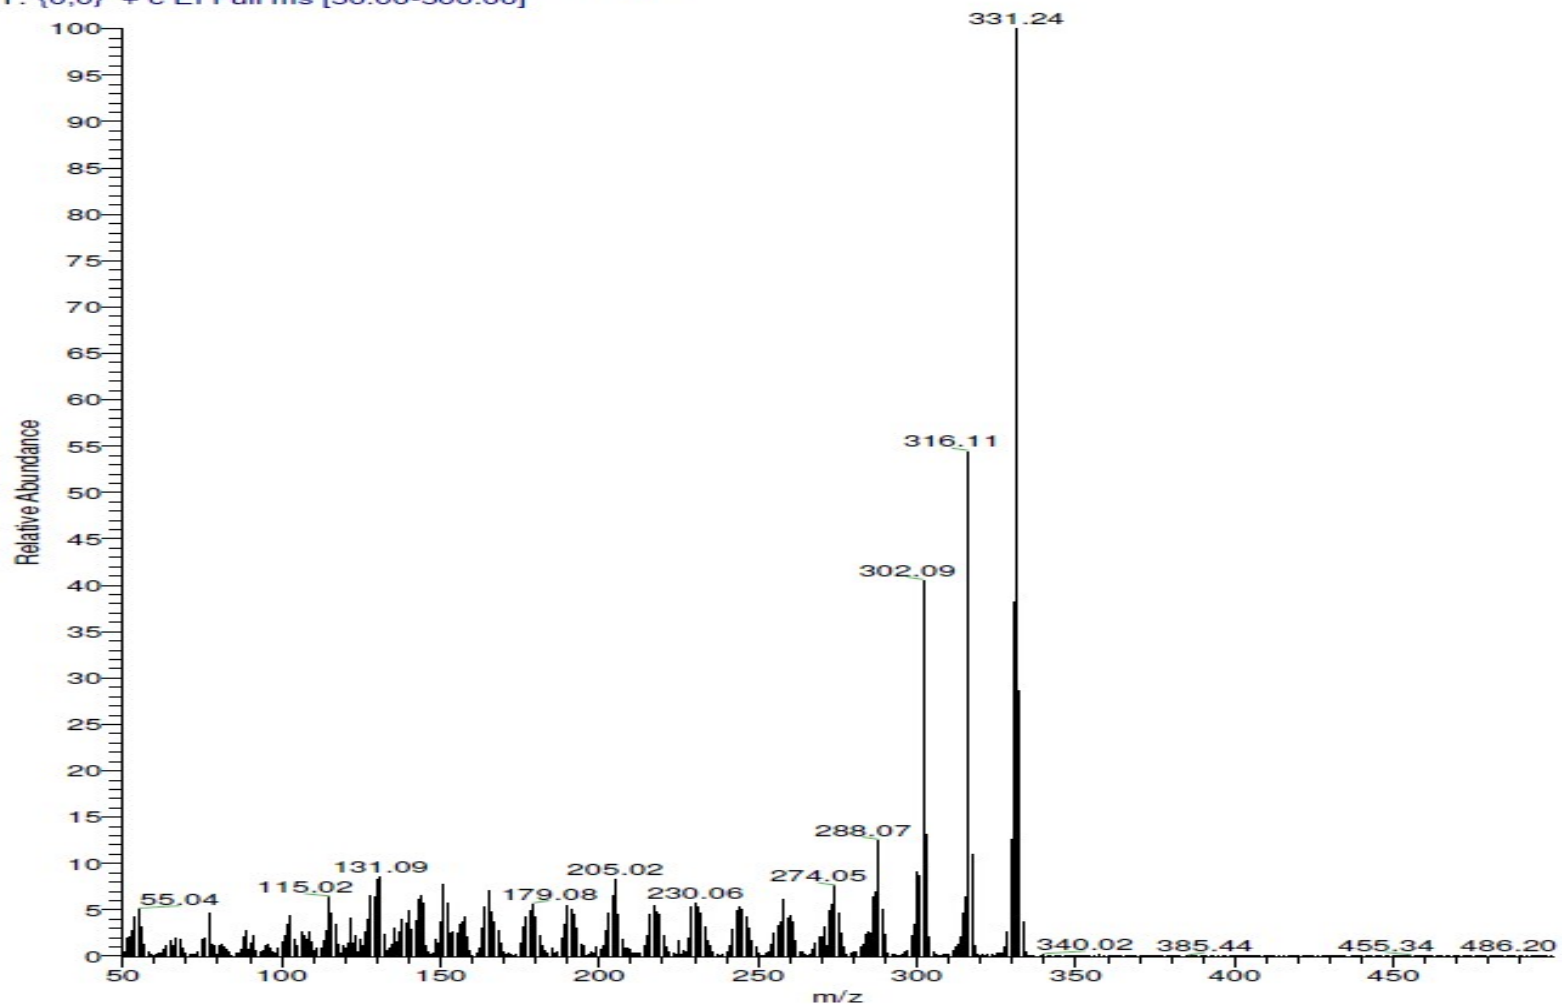

Fig. S48. Mass spectrum of compound 31.

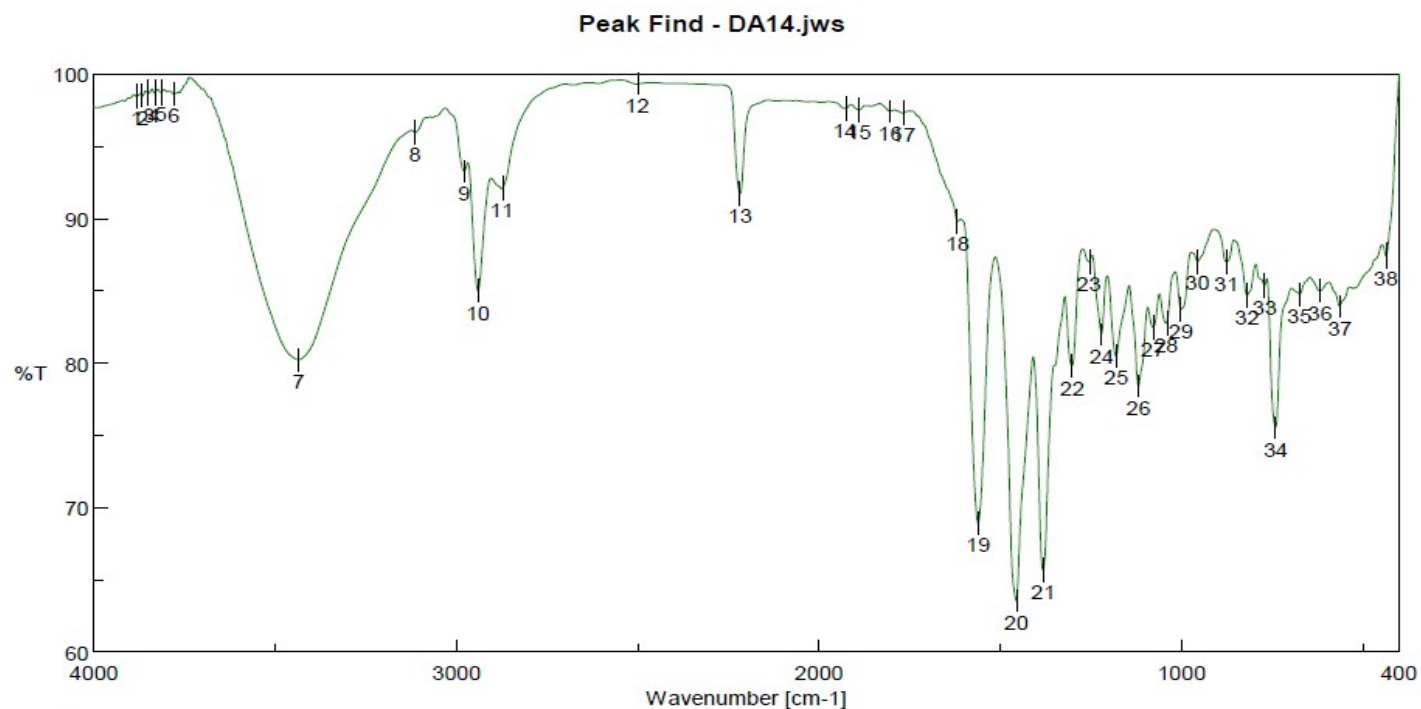

[ Result of Peak Picking ]

| No. | Position | Intensity |
|-----|----------|-----------|-----|----------|-----------|-----|----------|-----------|-----|----------|-----------|
| 1   | 3882.97  | 98.4512   | 2   | 3865.61  | 98.5005   | 3   | 3849.22  | 98.6985   | 4   | 3833.79  | 98.7127   |
| 5   | 3815.47  | 98.7639   | 6   | 3779.8   | 98.6295   | 7   | 3435.56  | 80.2385   | 8   | 3114.47  | 95.9632   |
| 9   | 2979.48  | 93.2915   | 10  | 2940.91  | 85.008    | 11  | 2875.34  | 92.0903   | 12  | 2502.19  | 99.3211   |
| 13  | 2217.74  | 91.727    | 14  | 1928.47  | 97.6273   | 15  | 1888.93  | 97.5305   | 16  | 1804.08  | 97.4192   |
| 17  | 1766.48  | 97.3184   | 18  | 1617.98  | 89.8006   | 19  | 1561.09  | 68.9301   | 20  | 1455.99  | 63.571    |
| 21  | 1381.75  | 65.6771   | 22  | 1301.72  | 79.8012   | 23  | 1255.43  | 87.0269   | 24  | 1220.72  | 82.0044   |
| 25  | 1180.22  | 80.4943   | 26  | 1118.51  | 78.4204   | 27  | 1078.98  | 82.4966   | 28  | 1042.34  | 82.7739   |
| 29  | 1000.87  | 83.7298   | 30  | 955.555  | 87.0525   | 31  | 875.524  | 87.0339   | 32  | 818.634  | 84.6954   |
| 33  | 770.423  | 85.3799   | 34  | 739.567  | 75.5586   | 35  | 673.999  | 84.7639   | 36  | 618.074  | 85.0238   |
| 37  | 563.112  | 83.9345   | 38  | 435.834  | 87.4195   |     |          |           |     |          |           |

**Fig. S49.** IR spectrum of compound **3m** (KBr pellet).

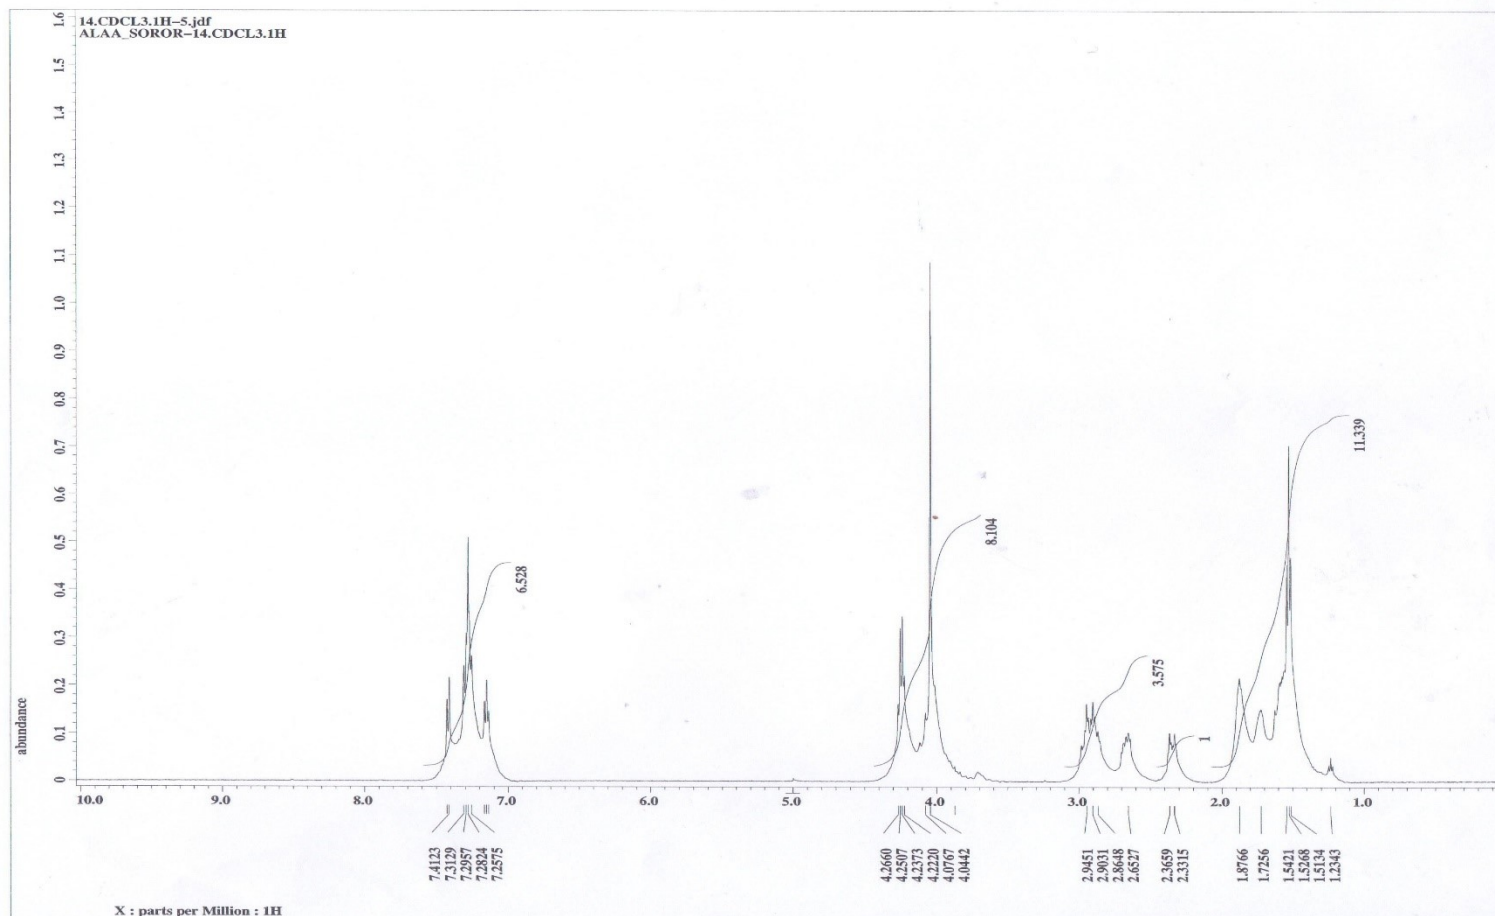

Fig. S50.  $^1\text{H}$ -NMR spectrum of compound **3m**.

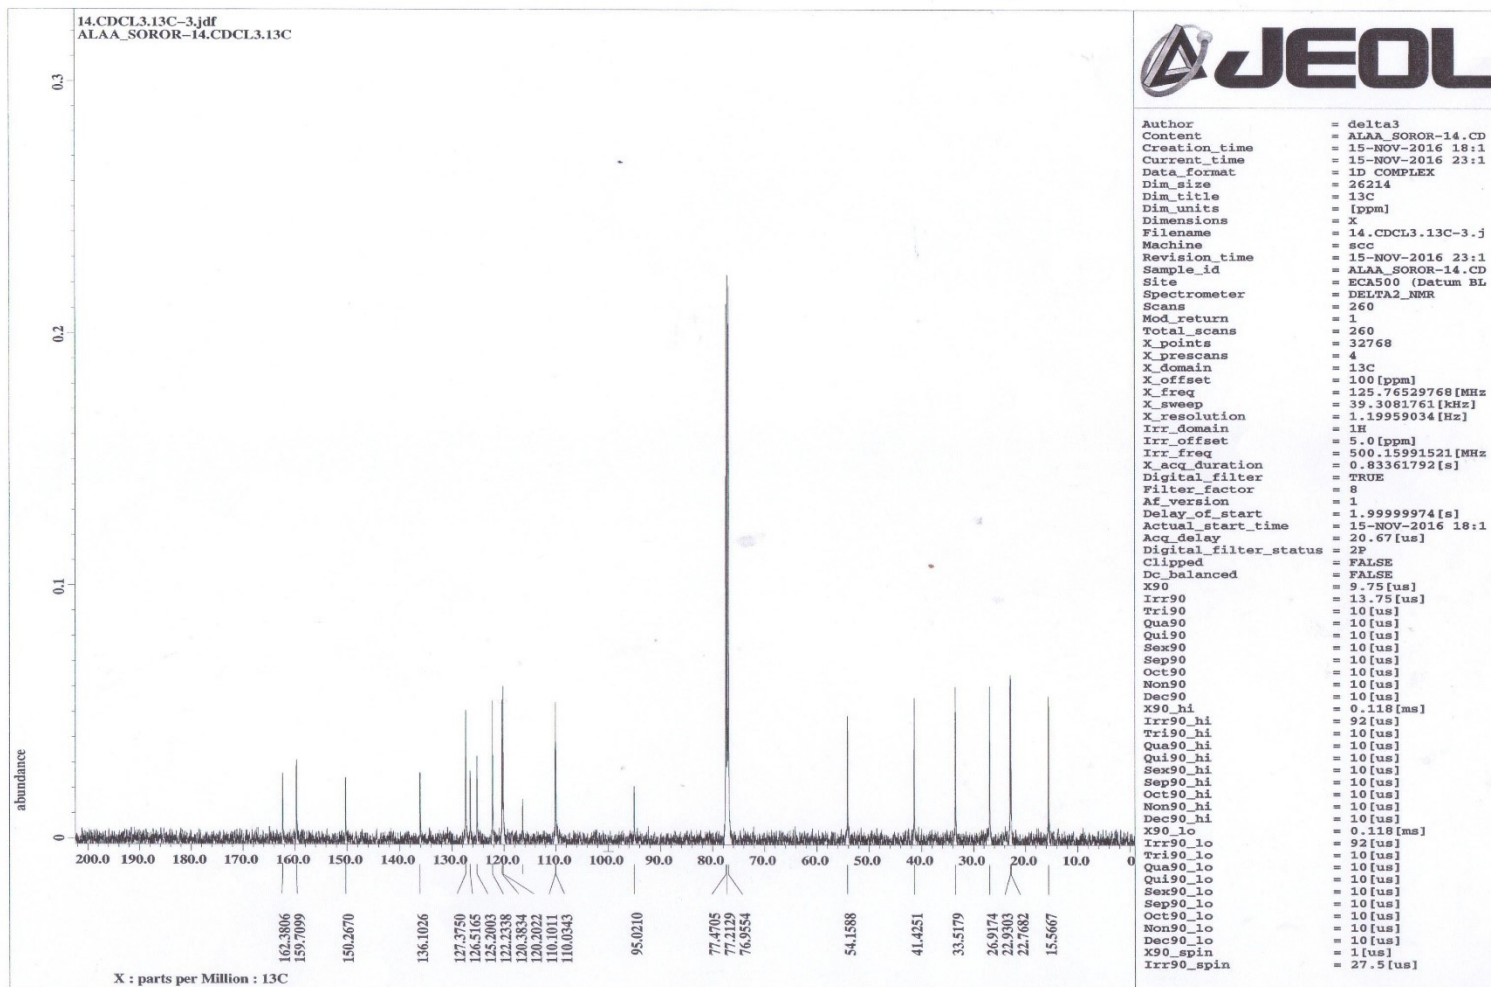

Fig. S51.  $^{13}\text{C}$ -NMR spectrum of compound **3m**.

Alaa-DA14 #781 RT: 2.69 AV: 1 NL: 1.98E7  
T: {0,0} + c EI Full ms [50.00-500.00]

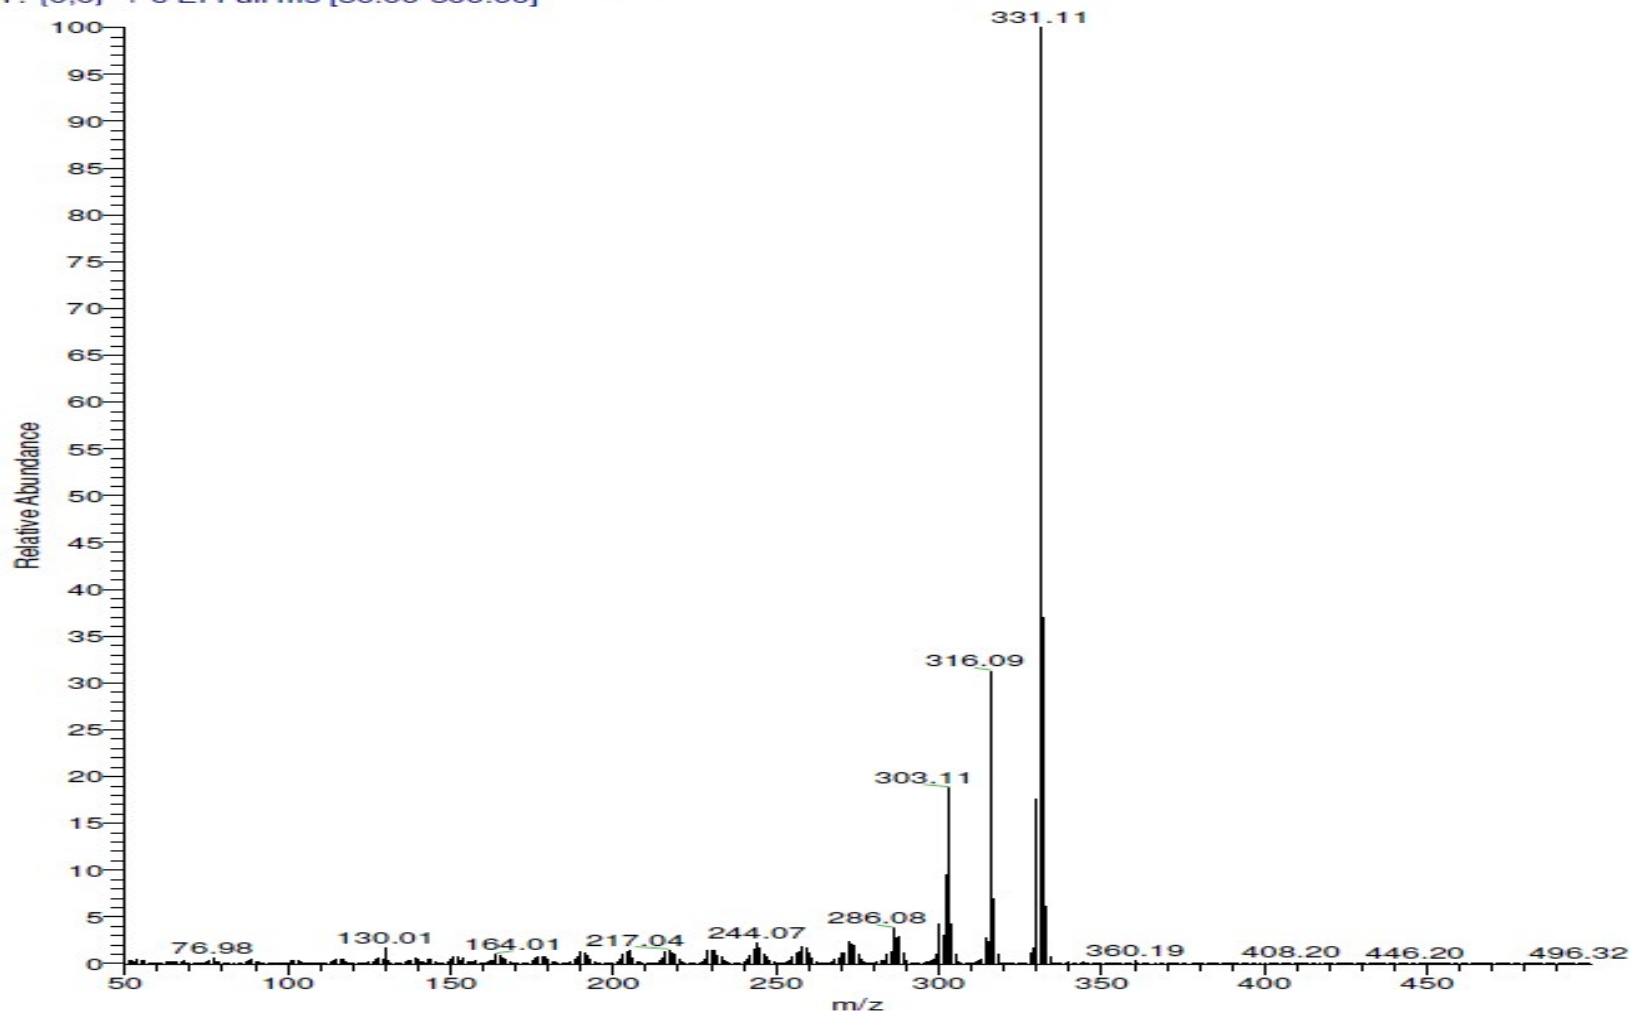

Fig. S52. Mass spectrum of compound 3m.



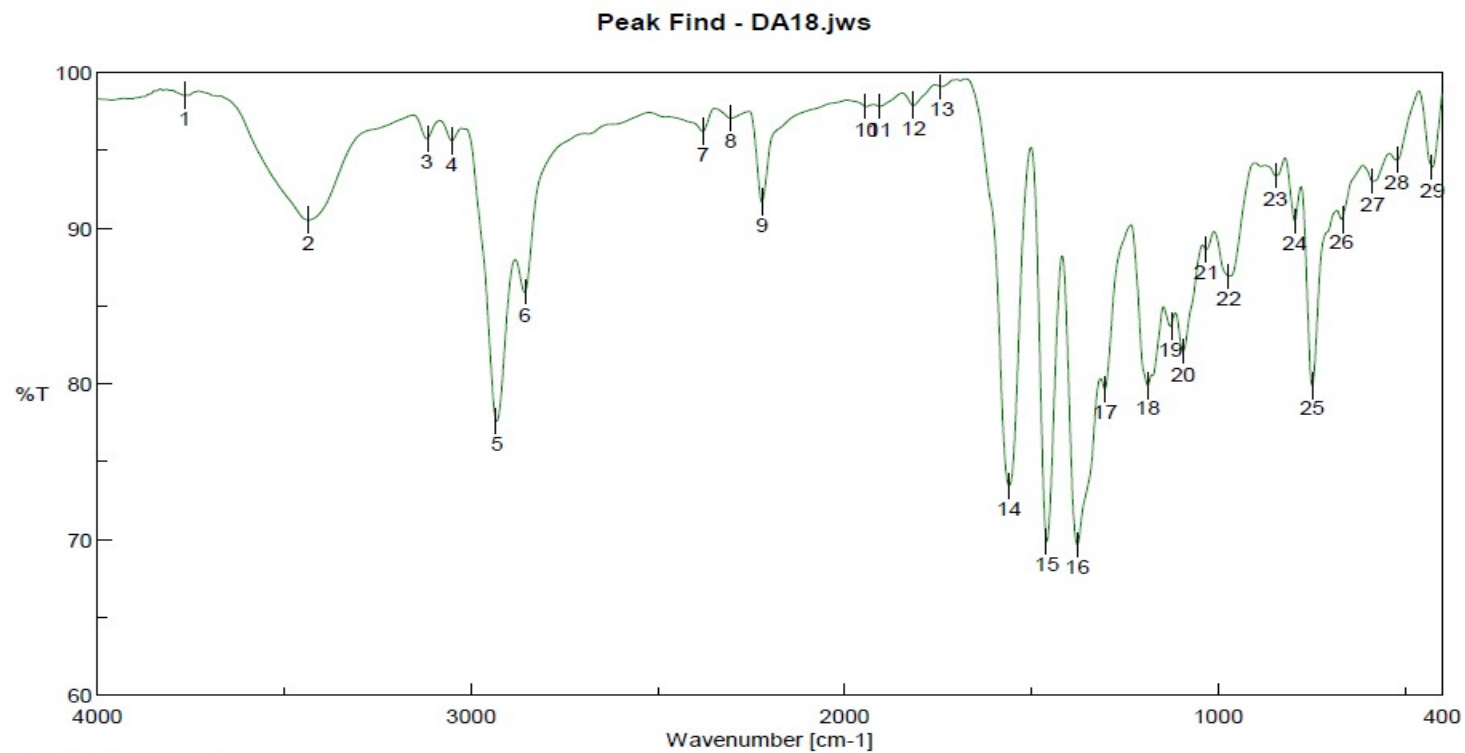

[ Result of Peak Picking ]

| No. | Position | Intensity | No. | Position | Intensity | No. | Position | Intensity |
|-----|----------|-----------|-----|----------|-----------|-----|----------|-----------|
| 1   | 3767.26  | 98.5222   | 2   | 3435.56  | 90.5107   | 3   | 3118.33  | 95.736    |
| 5   | 2931.27  | 77.5995   | 6   | 2856.06  | 85.8632   | 7   | 2379.73  | 96.2084   |
| 9   | 2221.59  | 91.6613   | 10  | 1941.97  | 97.7959   | 11  | 1906.29  | 97.8006   |
| 13  | 1739.48  | 99.0745   | 14  | 1560.13  | 73.4488   | 15  | 1458.89  | 69.8711   |
| 17  | 1302.68  | 79.6422   | 18  | 1187.94  | 79.9132   | 19  | 1128.15  | 83.6761   |
| 21  | 1031.73  | 88.6189   | 22  | 970.983  | 86.9092   | 23  | 846.597  | 93.3549   |
| 25  | 748.245  | 79.8727   | 26  | 670.142  | 90.5609   | 27  | 586.254  | 92.9907   |
| 29  | 426.191  | 93.9059   |     |          |           | 28  | 521.65   | 94.3747   |

**Fig. S53.** IR spectrum of compound **3n** (KBr pellet).

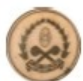

Dr\_ZaneebNovel-18

Dr\_ZaneebNovel-18

Sample Name Dr\_ZaneebNovel-18  
Date collected 2017-04-27

Pulse sequence PROTON  
Solvent cdcl3

Temperature 25  
Spectrometer nmr400-mercury400

Study owner vnmr1  
Operator vnmr1

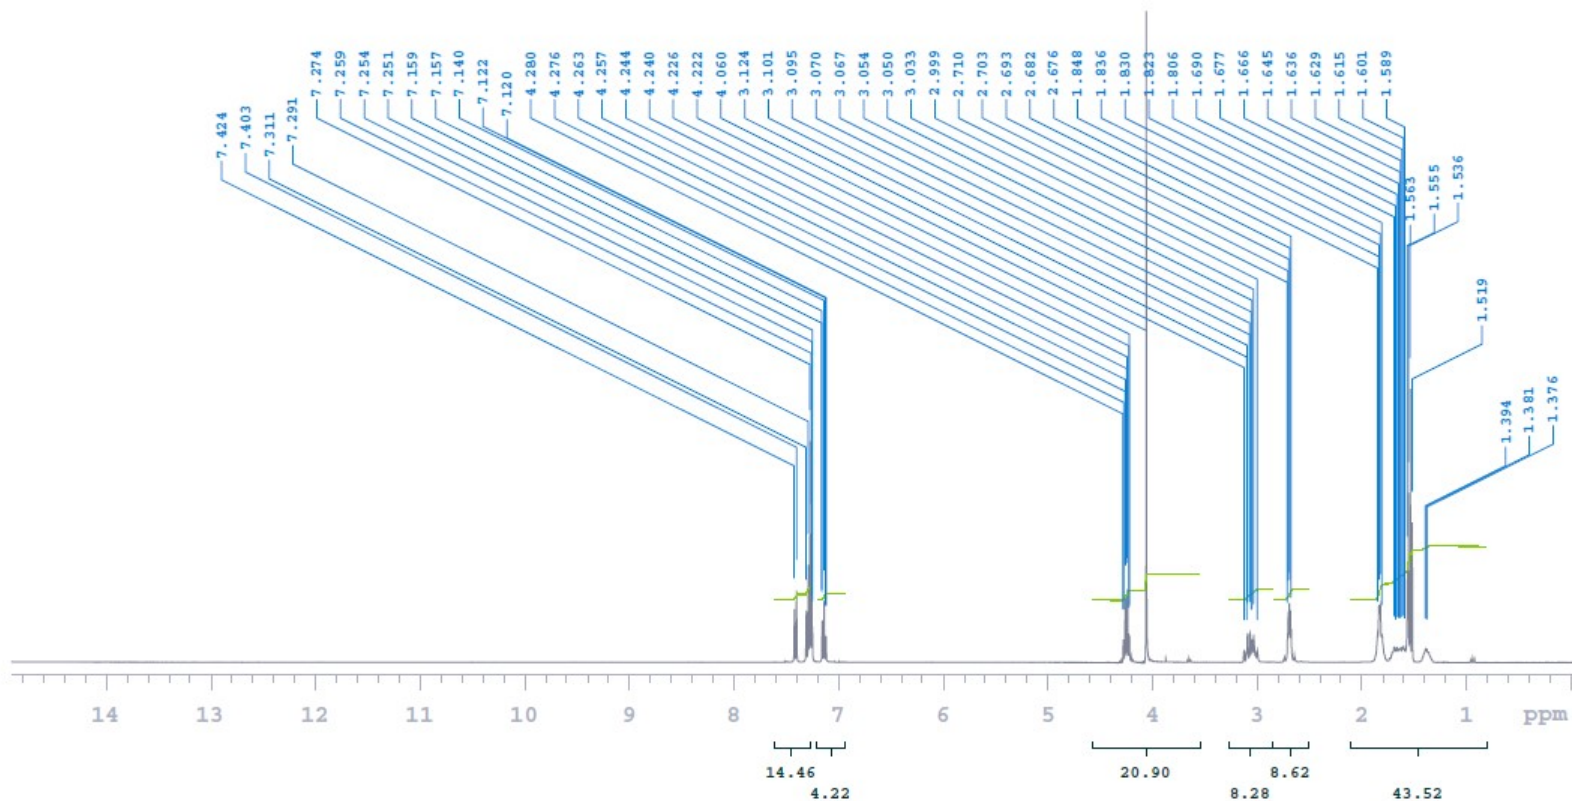

Fig. S54.  $^1\text{H}$ -NMR spectrum of compound **3n**.

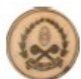

Dr\_ZaneebNovel-DA18

Dr\_ZaneebNovel-DA18

Sample Name **Dr\_ZaneebNovel-DA18**  
Date collected **2017-07-30**

Pulse sequence **CARBON**  
Solvent **cdcl3**

Temperature **25**  
Spectrometer **nmr400-mercury400**

Study owner **vnmr1**  
Operator **vnmr1**

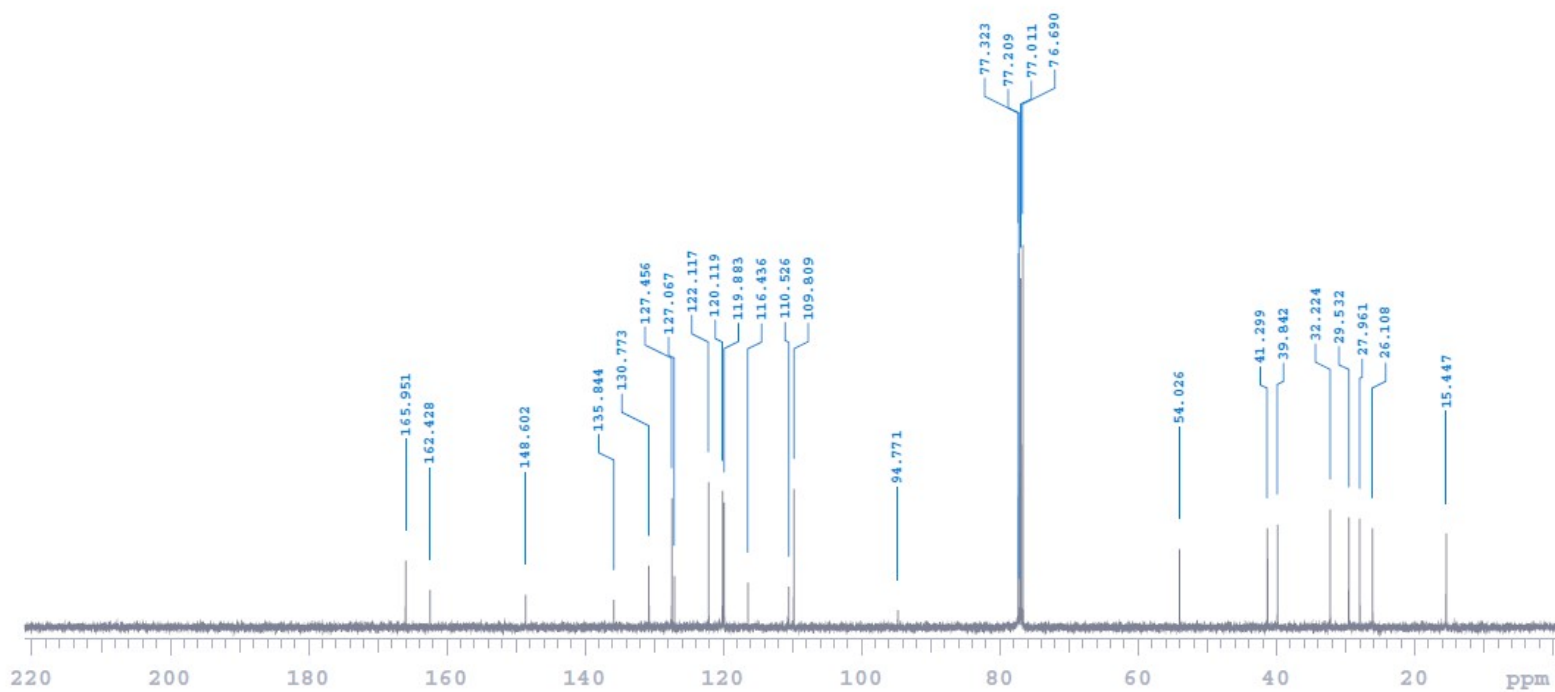

Fig. S55.  $^{13}\text{C}$ -NMR spectrum of compound **3n**.

Alaa-DA18 #766 RT: 2.64 AV: 1 NL: 2.55E7  
T: {0,0} + c EI Full ms [50.00-500.00]

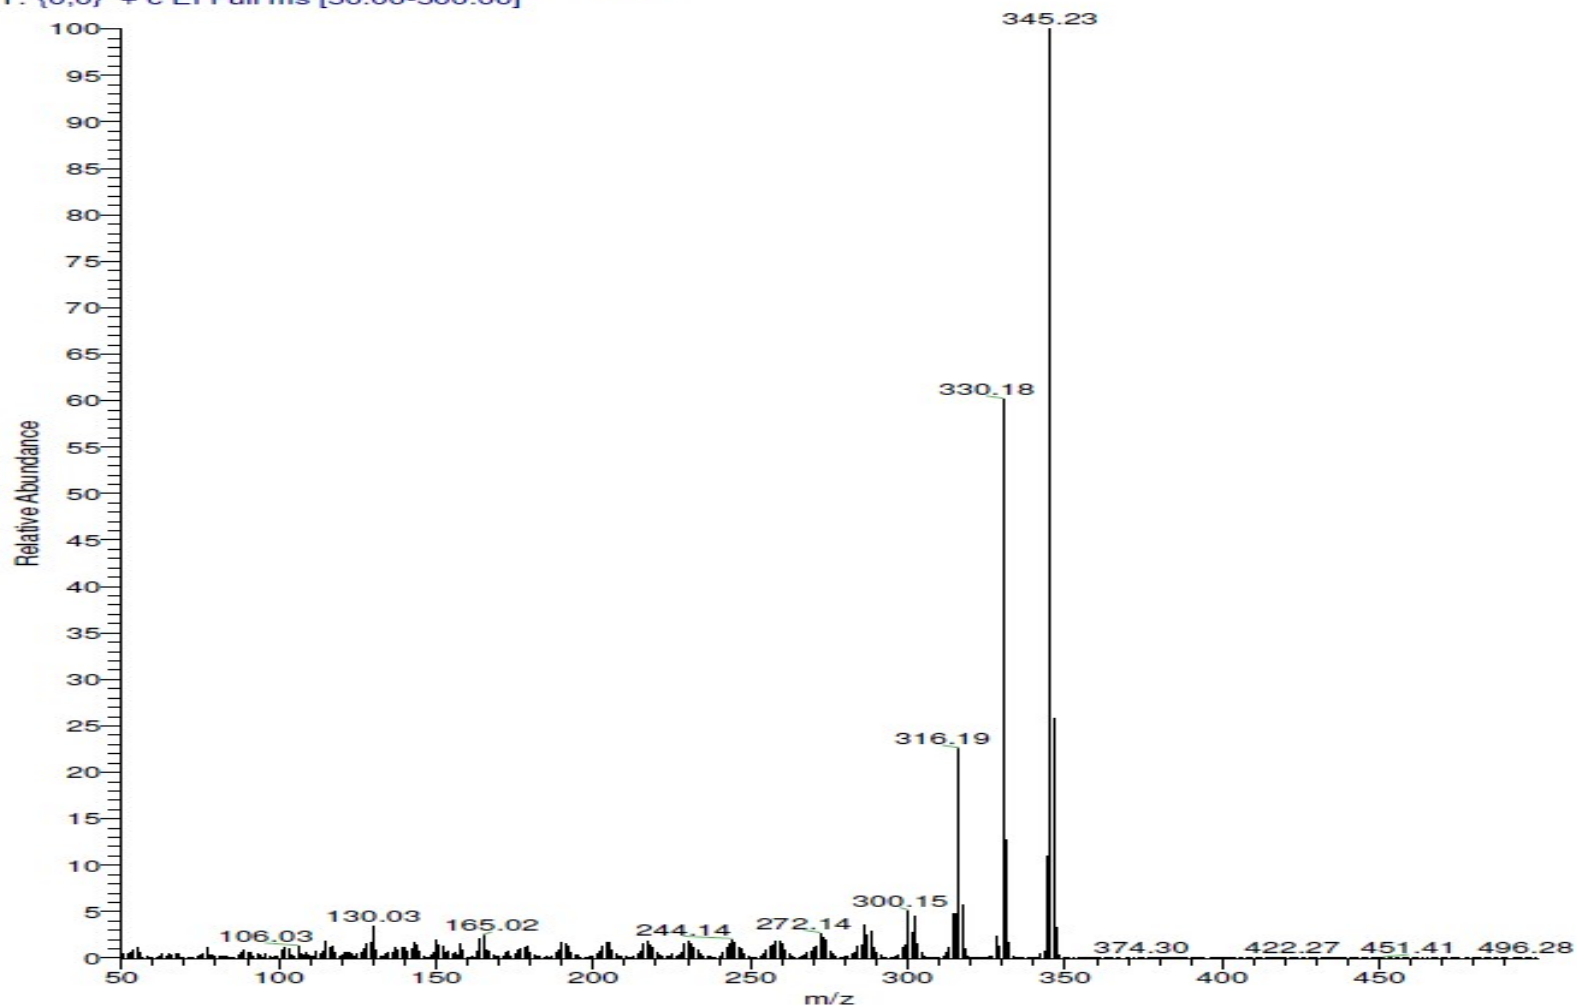

Fig. S56. Mass spectrum of compound 3n.

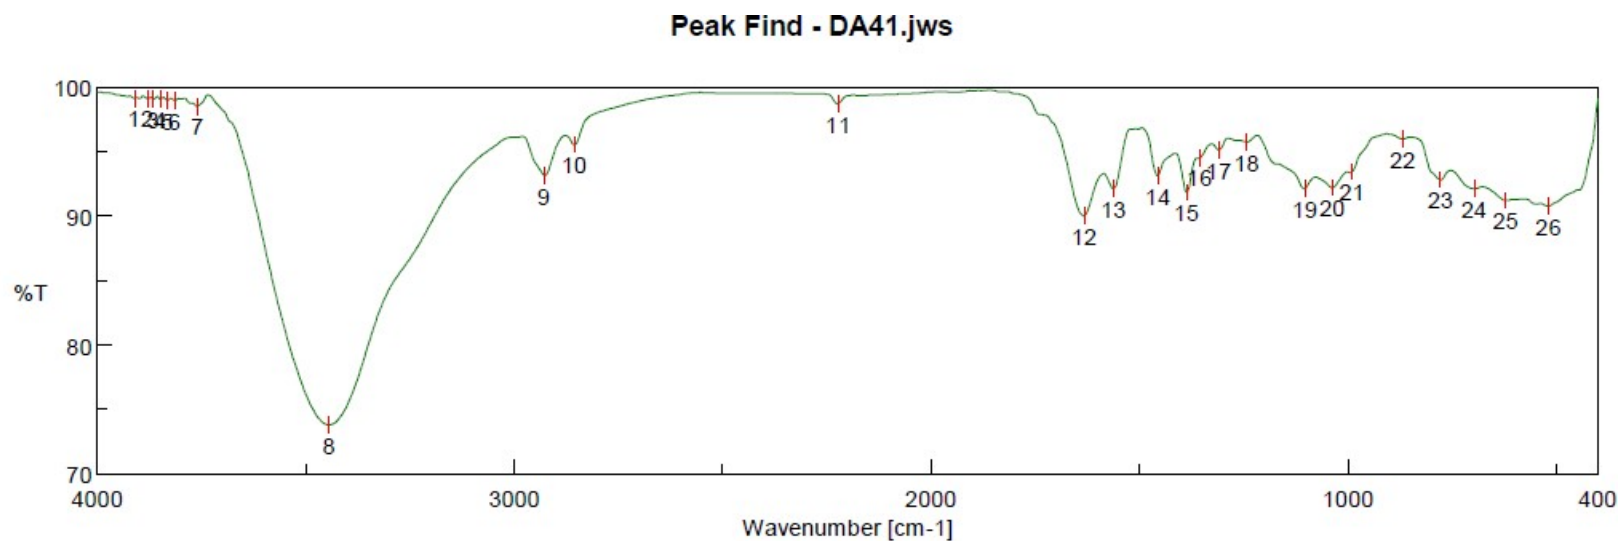

[ Result of Peak Picking ]

| No. | Position | Intensity |
|-----|----------|-----------|-----|----------|-----------|-----|----------|-----------|-----|----------|-----------|
| 1   | 3910.93  | 99.1108   | 2   | 3880.08  | 99.0868   | 3   | 3864.65  | 99.0432   | 4   | 3849.22  | 99.0428   |
| 5   | 3831.86  | 98.9487   | 6   | 3814.51  | 98.9494   | 7   | 3760.51  | 98.4767   | 8   | 3444.24  | 73.7942   |
| 9   | 2927.41  | 93.1381   | 10  | 2856.06  | 95.5153   | 11  | 2223.52  | 98.6905   | 12  | 1633.41  | 90.0008   |
| 13  | 1562.06  | 92.1336   | 14  | 1455.99  | 93.1264   | 15  | 1386.57  | 91.8487   | 16  | 1355.71  | 94.4913   |
| 17  | 1309.43  | 95.1197   | 18  | 1241.93  | 95.7198   | 19  | 1103.08  | 92.1092   | 20  | 1037.52  | 92.1804   |
| 21  | 989.304  | 93.4313   | 22  | 867.81   | 95.9626   | 23  | 777.172  | 92.799    | 24  | 696.177  | 92.1016   |
| 25  | 620.966  | 91.1981   | 26  | 518.758  | 90.7549   |     |          |           |     |          |           |

**Fig. S57.** IR spectrum of compound **3o** (KBr pellet).

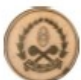

Dr\_AlaaEldinSrou-DA41

Dr\_AlaaEldinSrou-DA41

Sample Name Dr\_AlaaEldinSrou-DA41  
Date collected 2018-02-14

Pulse sequence PROTON  
Solvent CDCL3

Temperature 25  
Spectrometer nmr400-mercury400

Study owner vnmr1  
Operator vnmr1

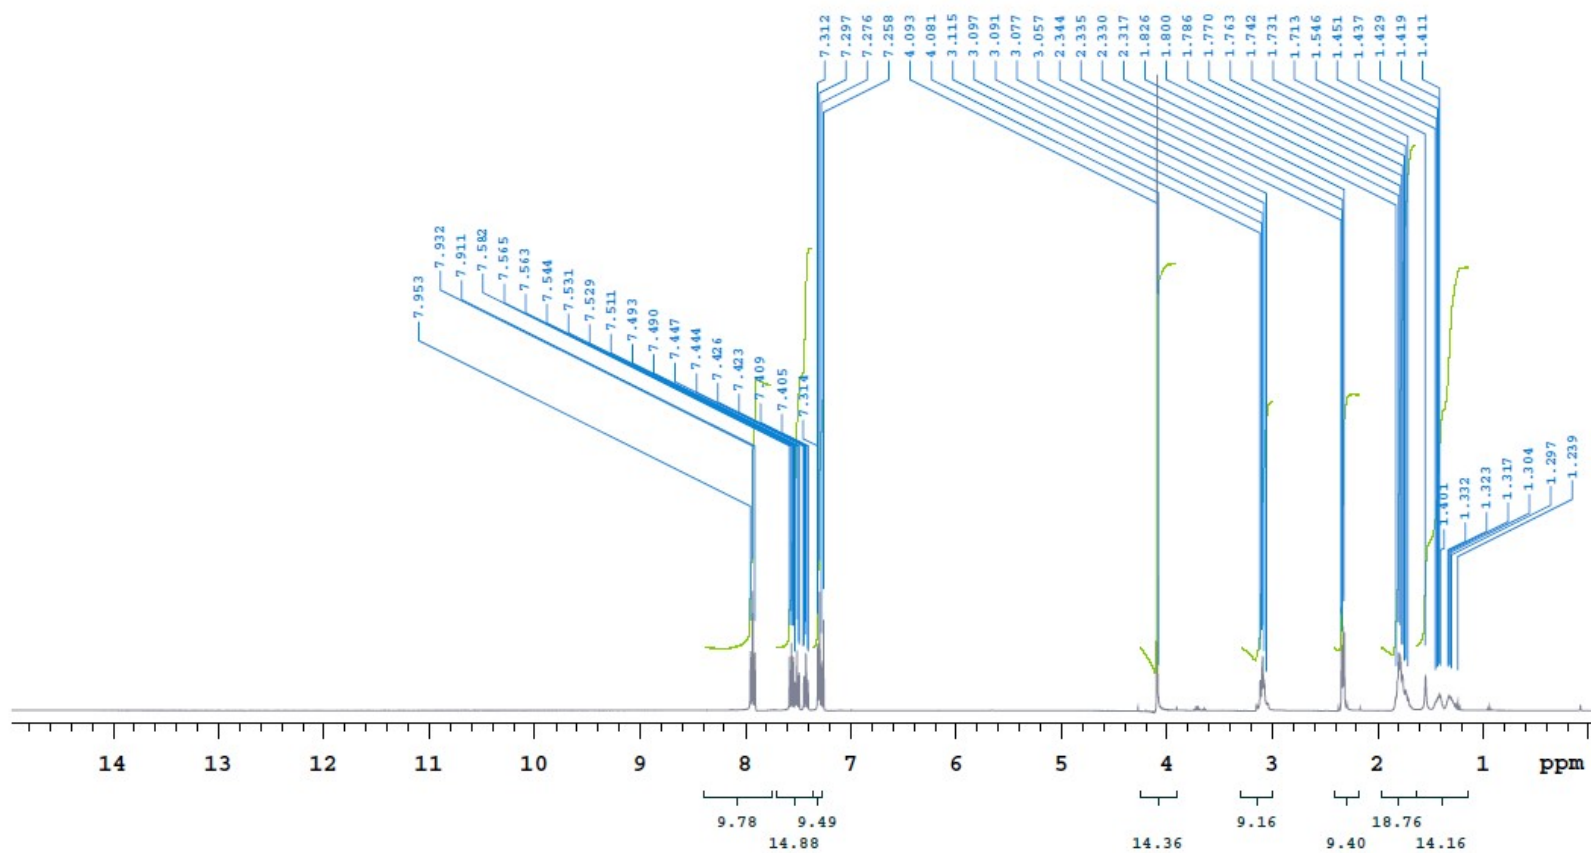

Fig. S58.  $^1\text{H}$ -NMR spectrum of compound **3o**.

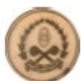

Dr\_AlaaEldinSrou-DA41

Dr\_AlaaEldinSrou-DA41

Sample Name Dr\_AlaaEldinSrou-DA41  
Date collected 2018-02-14

Pulse sequence CARBON  
Solvent CDCL3

Temperature 25  
Spectrometer nmr400-mercury400

Study owner vnmr1  
Operator vnmr1

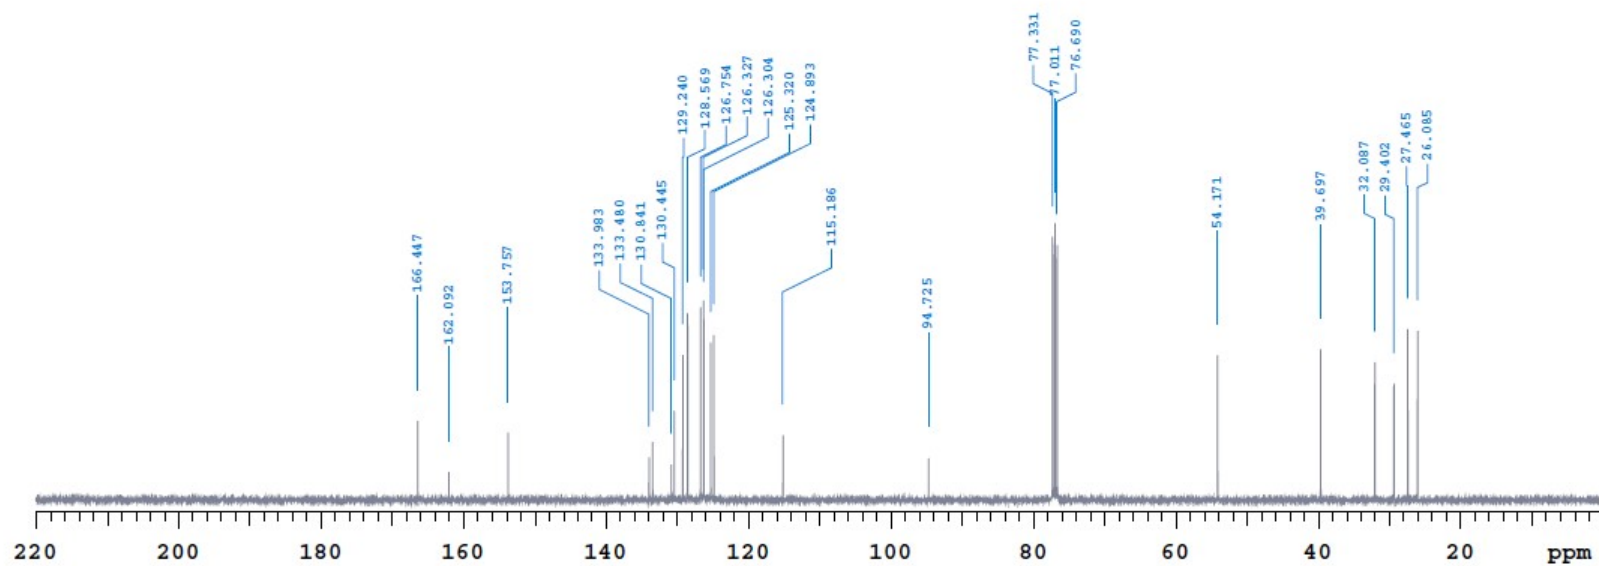

Fig. S59.  $^{13}\text{C}$ -NMR spectrum of compound **30**.

DA41 #765 RT: 2.63 AV: 1 NL: 3.72E6  
T: {0,0} + c EI Full ms [50.00-500.00]

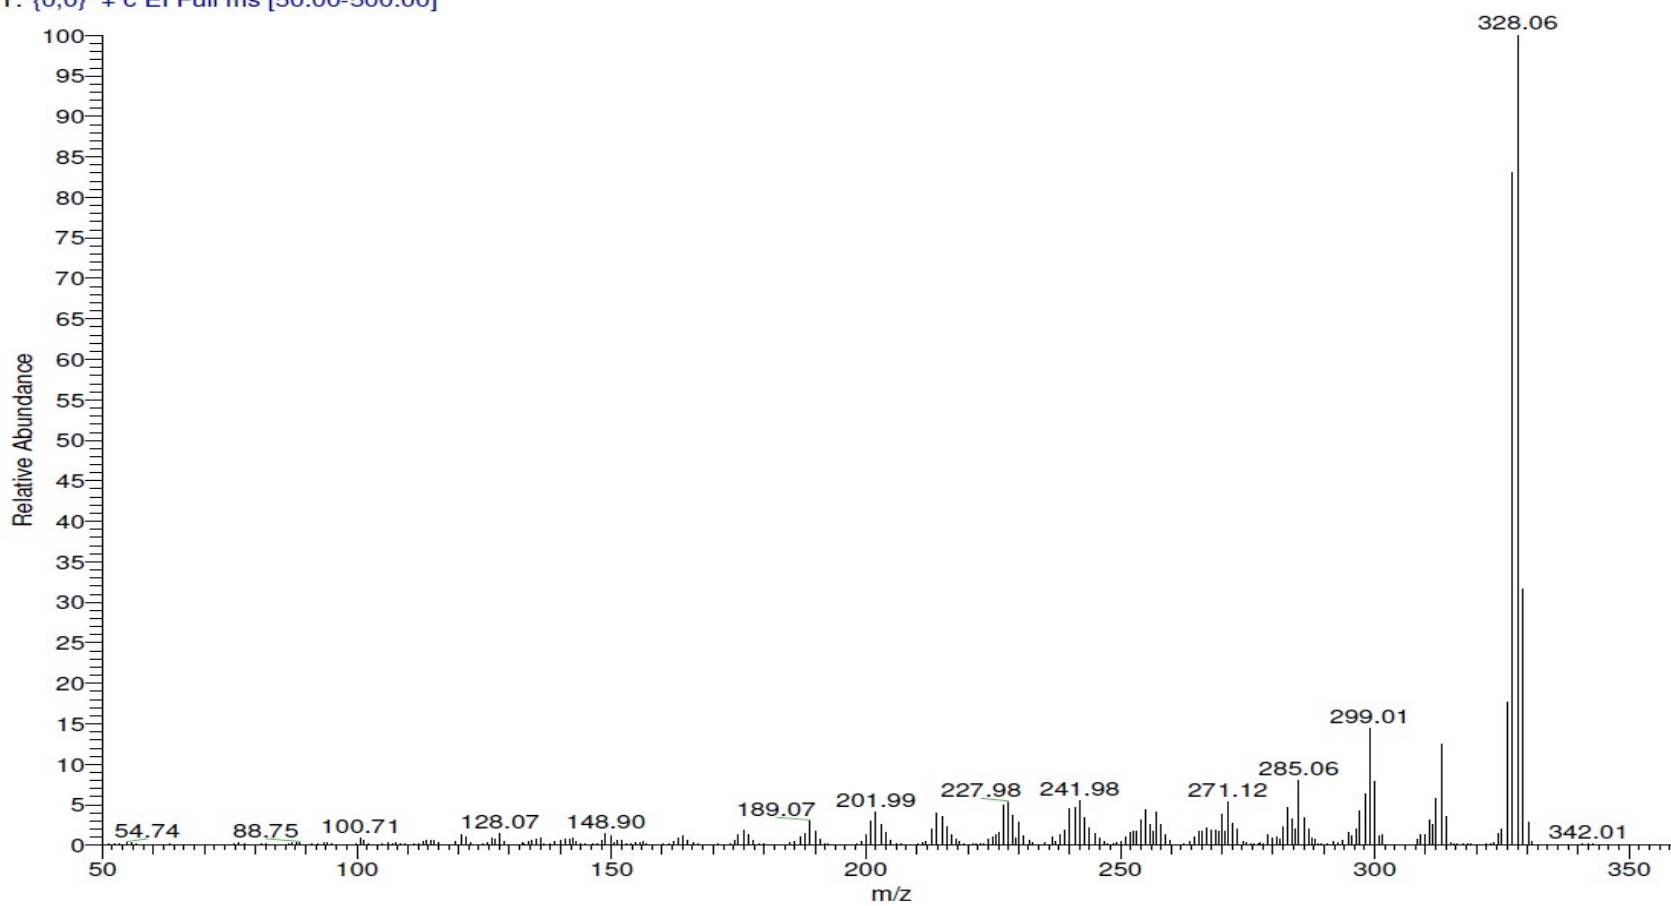

Fig. S60. Mass spectrum of compound 3o.



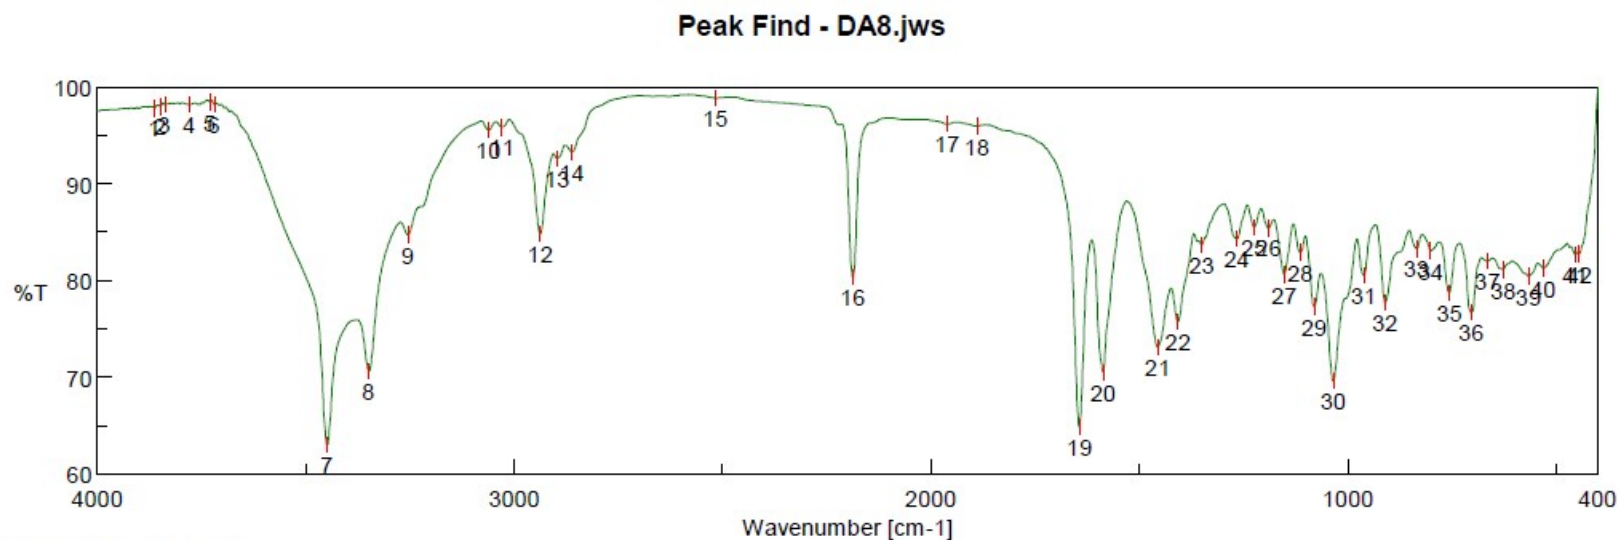

[ Result of Peak Picking ]

| No. | Position | Intensity | No. | Position | Intensity | No. | Position | Intensity |
|-----|----------|-----------|-----|----------|-----------|-----|----------|-----------|
| 1   | 3862.72  | 97.8019   | 2   | 3849.22  | 97.983    | 3   | 3837.65  | 98.1861   |
| 5   | 3729.66  | 98.4447   | 6   | 3719.05  | 98.1816   | 7   | 3449.06  | 62.9924   |
| 9   | 3255.25  | 84.6855   | 10  | 3061.44  | 95.5514   | 11  | 3029.62  | 95.847    |
| 13  | 2896.56  | 92.5933   | 14  | 2861.84  | 93.2857   | 15  | 2517.61  | 98.843    |
| 17  | 1961.25  | 96.154    | 18  | 1889.9   | 95.9632   | 19  | 1644.02  | 64.8166   |
| 21  | 1455.99  | 73.0759   | 22  | 1406.82  | 75.7209   | 23  | 1350.89  | 83.6421   |
| 25  | 1224.58  | 85.4917   | 26  | 1189.86  | 85.4086   | 27  | 1152.26  | 80.599    |
| 29  | 1079.94  | 77.2507   | 30  | 1034.62  | 69.5687   | 31  | 961.341  | 80.5217   |
| 33  | 834.062  | 83.2646   | 34  | 800.314  | 83.0671   | 35  | 755.959  | 78.7408   |
| 37  | 664.357  | 81.9508   | 38  | 626.752  | 81.1138   | 39  | 566.005  | 80.4052   |
| 41  | 454.154  | 82.6534   | 42  | 444.512  | 82.749    | 40  | 530.328  | 81.2352   |

**Fig. S61.** IR spectrum of compound **4a** (KBr pellet).

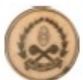

Dr\_ZaneebNovel-8

Dr\_ZaneebNovel-8

Sample Name Dr\_ZaneebNovel-8  
Date collected 2017-04-27

Pulse sequence PROTON  
Solvent cdcl3

Temperature 25  
Spectrometer nmr400-mercury400

Study owner vnmr1  
Operator vnmr1

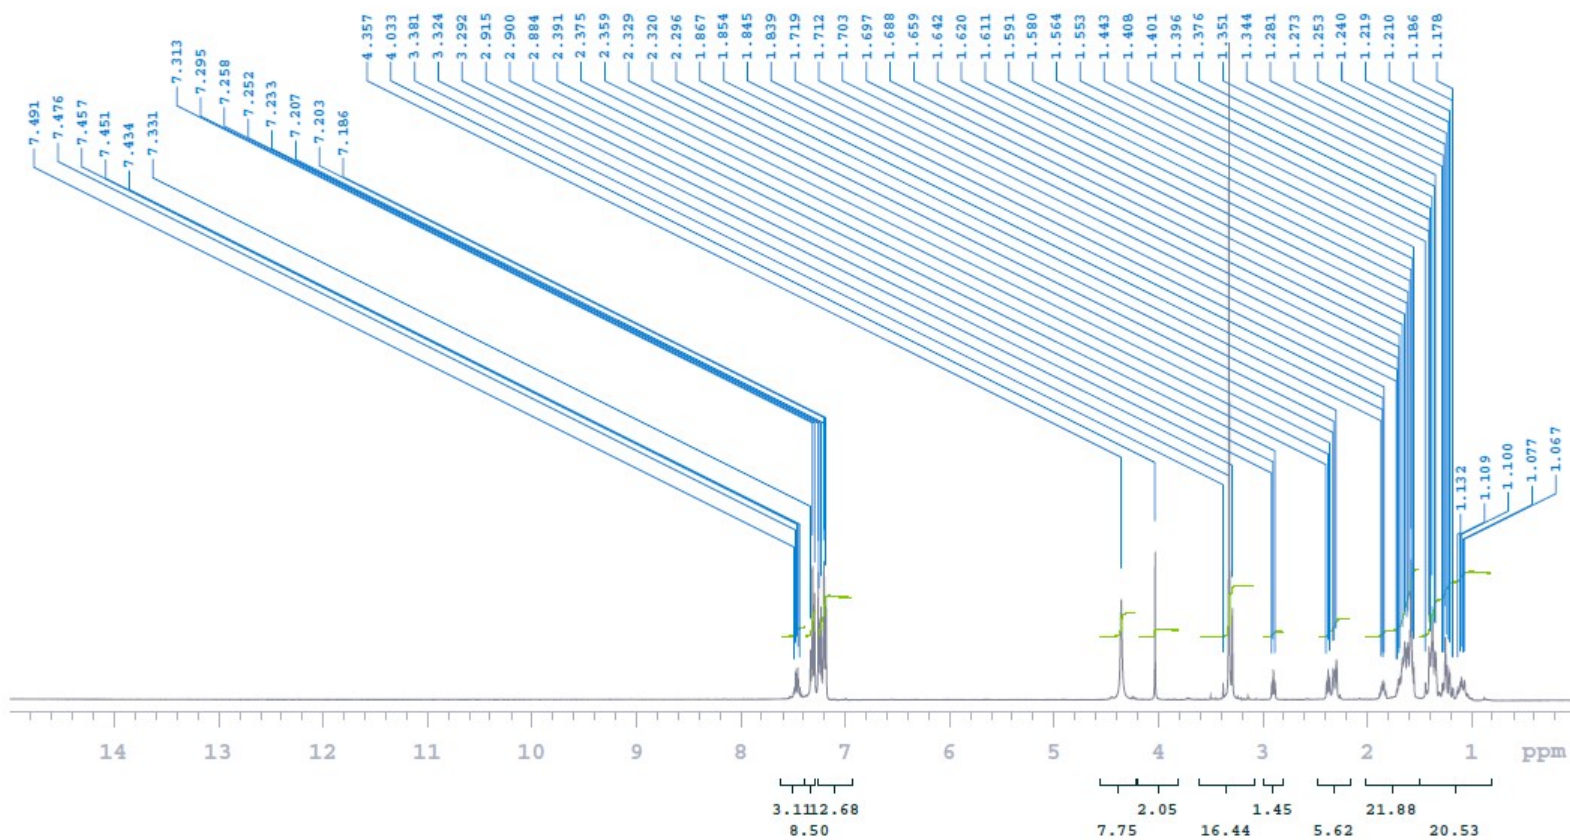

Fig. S62. <sup>1</sup>H-NMR spectrum of compound 4a.

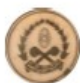

Dr\_ZaneebNovel-DA8

Dr\_ZaneebNovel-DA8

Sample Name Dr\_ZaneebNovel-DA8  
Date collected 2017-08-03

Pulse sequence CARBON  
Solvent cdcl3

Temperature 25  
Spectrometer nmr400-mercury400

Study owner vnmr1  
Operator vnmr1

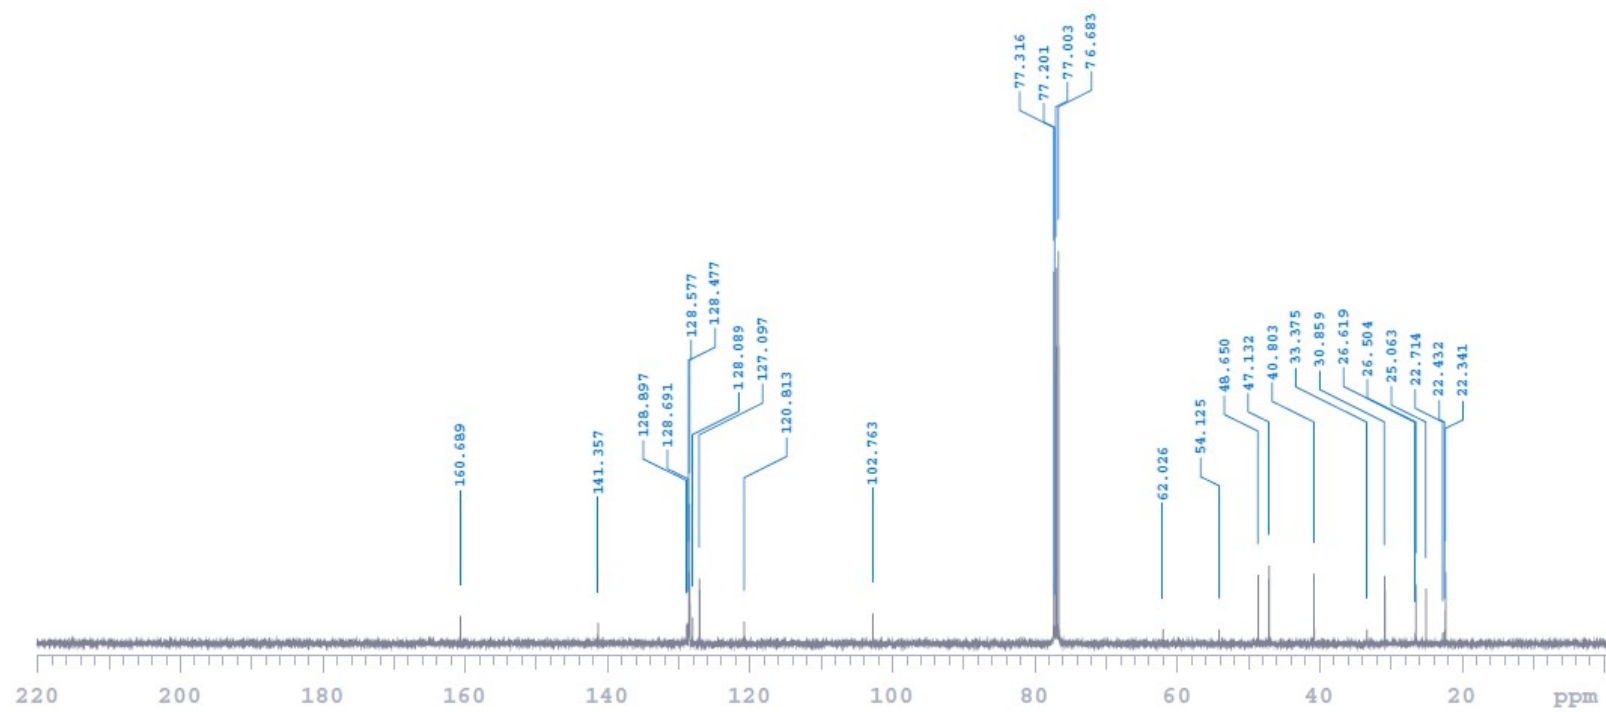

Fig. S63. <sup>13</sup>C-NMR spectrum of compound 4a.

Alaa-DA8 #552 RT: 1.91 AV: 1 NL: 9.68E5  
T: {0,0} + c EI Full ms [50.00-500.00]

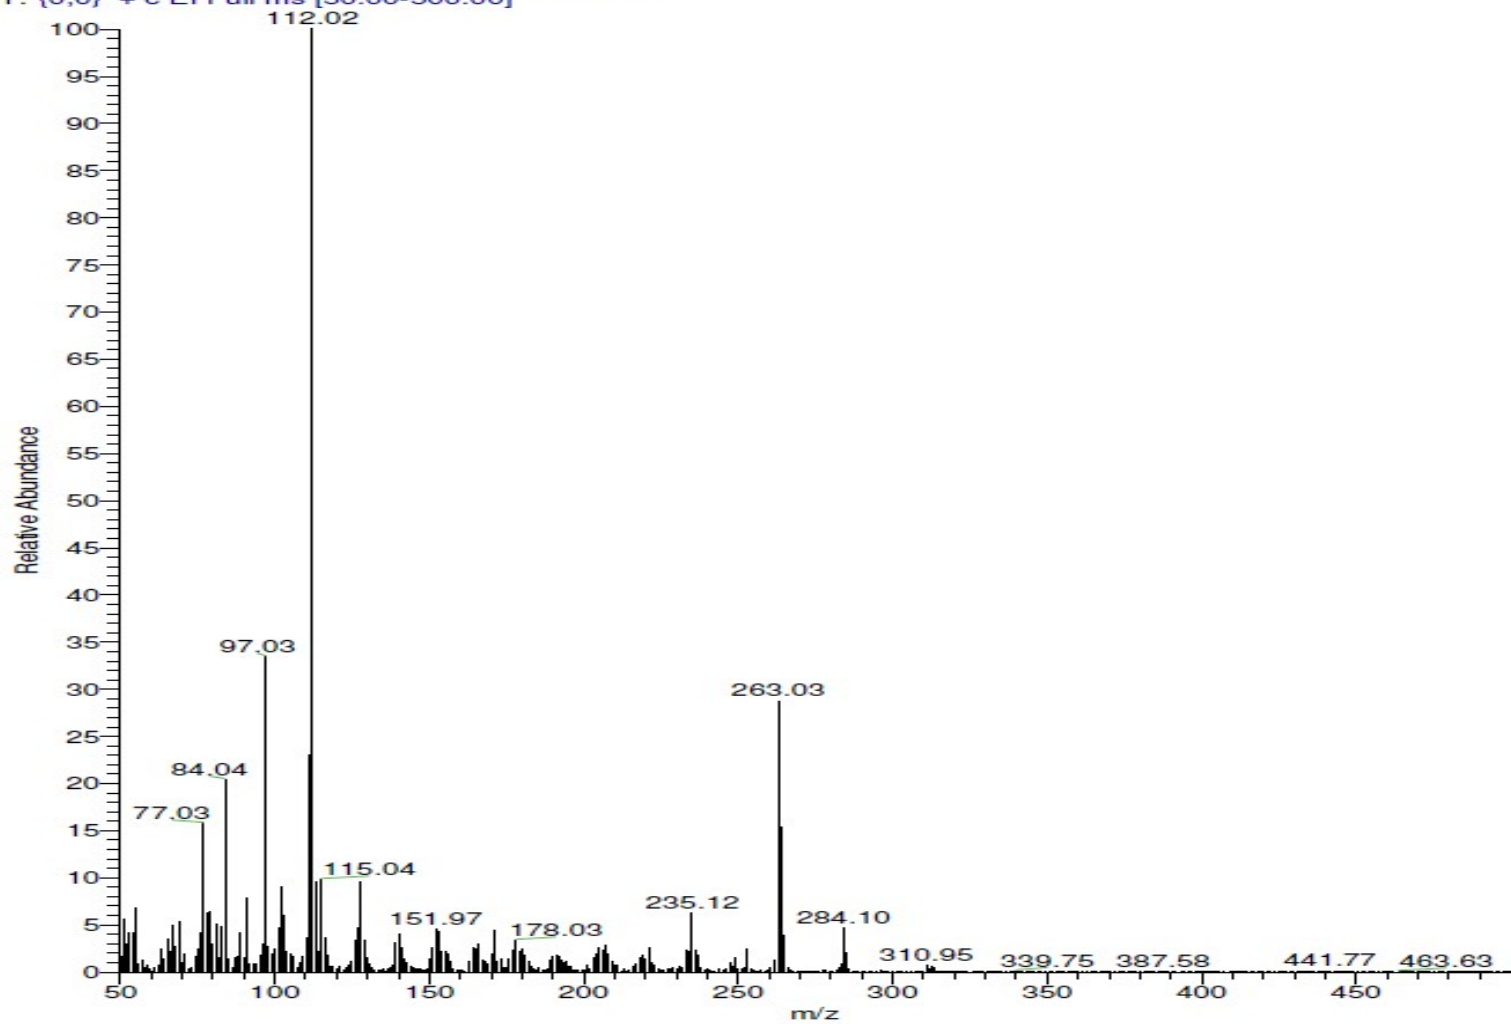

Fig. S64. Mass spectrum of compound 4a.

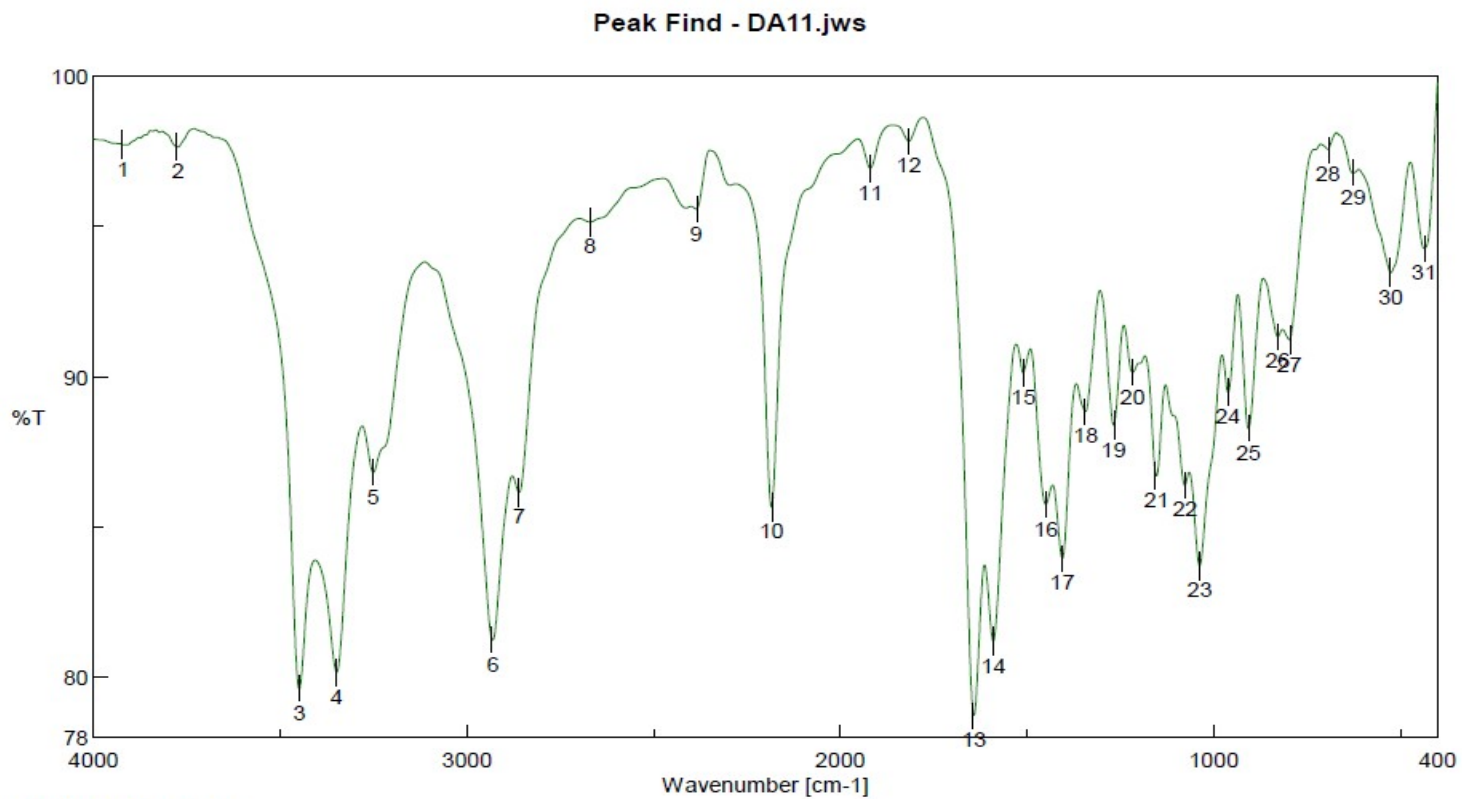

[ Result of Peak Picking ]

| No. | Position | Intensity |
|-----|----------|-----------|-----|----------|-----------|-----|----------|-----------|-----|----------|-----------|
| 1   | 3920.57  | 97.7102   | 2   | 3774.01  | 97.6344   | 3   | 3449.06  | 79.6114   | 4   | 3348.78  | 80.1684   |
| 5   | 3251.4   | 86.817    | 6   | 2931.27  | 81.2399   | 7   | 2859.92  | 86.1451   | 8   | 2670.93  | 95.1361   |
| 9   | 2386.48  | 95.576    | 10  | 2184.95  | 85.6659   | 11  | 1919.79  | 96.9261   | 12  | 1816.62  | 97.8241   |
| 13  | 1642.09  | 78.7363   | 14  | 1590.02  | 81.1977   | 15  | 1509.99  | 90.1287   | 16  | 1449.24  | 85.7486   |
| 17  | 1404.89  | 83.9529   | 18  | 1343.18  | 88.8356   | 19  | 1267.97  | 88.3874   | 20  | 1216.86  | 90.1472   |
| 21  | 1153.22  | 86.7013   | 22  | 1077.05  | 86.388    | 23  | 1037.52  | 83.7099   | 24  | 961.341  | 89.4753   |
| 25  | 906.379  | 88.2704   | 26  | 828.277  | 91.3246   | 27  | 797.421  | 91.2274   | 28  | 694.248  | 97.5597   |
| 29  | 625.788  | 96.7734   | 30  | 525.507  | 93.4575   | 31  | 435.834  | 94.2594   |     |          |           |

**Fig. S65.** IR spectrum of compound **4b** (KBr pellet).

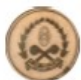

Dr\_ZaneebNovel-11

Dr\_ZaneebNovel-11

Sample Name Dr\_ZaneebNovel-11  
Date collected 2017-04-27

Pulse sequence PROTON  
Solvent cdcl3

Temperature 25  
Spectrometer nmr400-mercury400

Study owner vnmr1  
Operator vnmr1

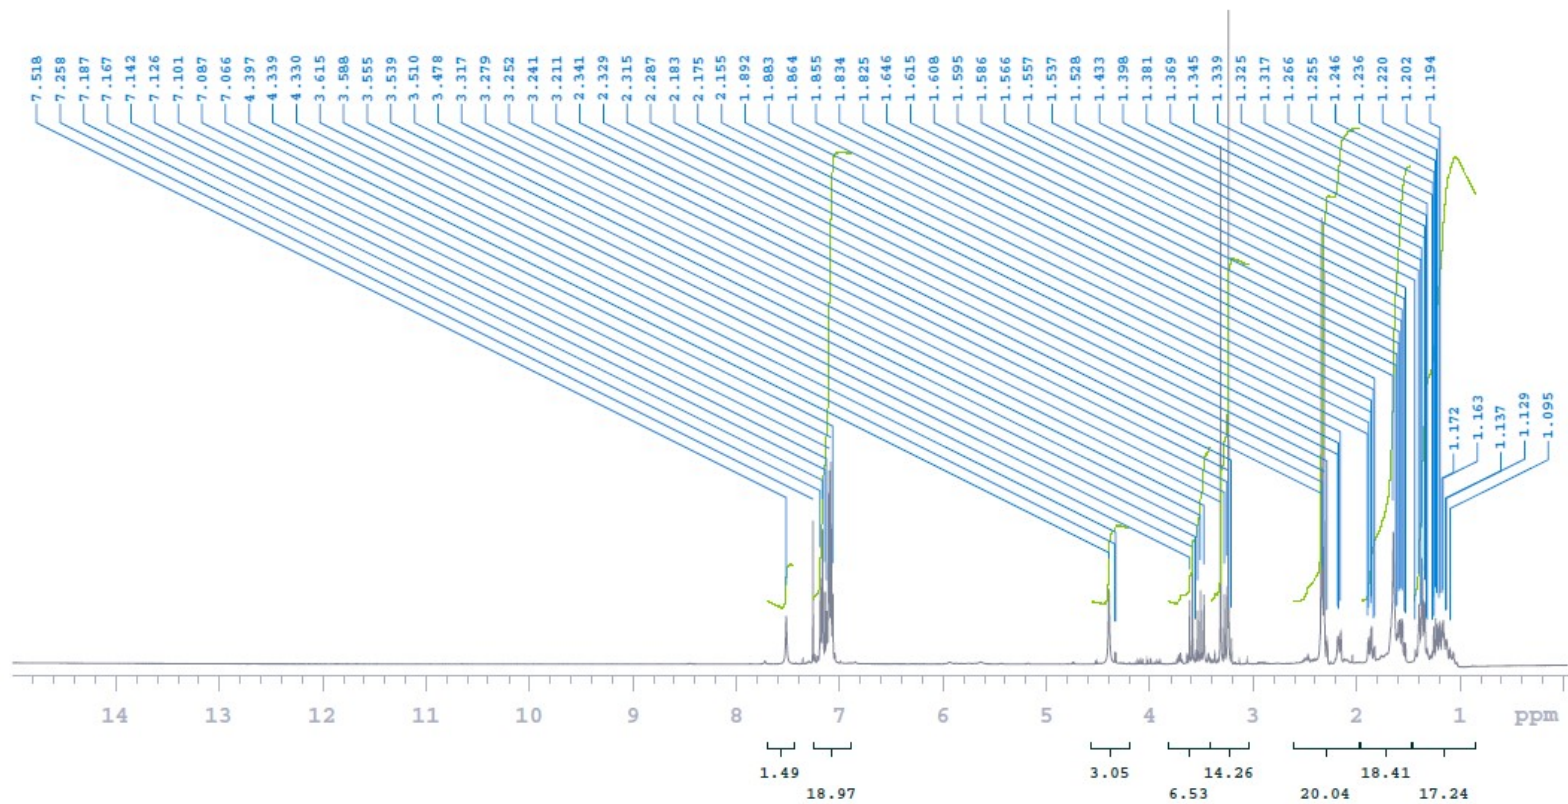

Fig. S66. <sup>1</sup>H-NMR spectrum of compound **4b**.

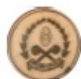

Dr\_ZaneebNovel-DA11

Dr\_ZaneebNovel-DA11

Sample Name Dr\_ZaneebNovel-DA11  
Date collected 2017-08-02

Pulse sequence CARBON  
Solvent cdcl3

Temperature 25  
Spectrometer nmr400-mercury400

Study owner vnmr1  
Operator vnmr1

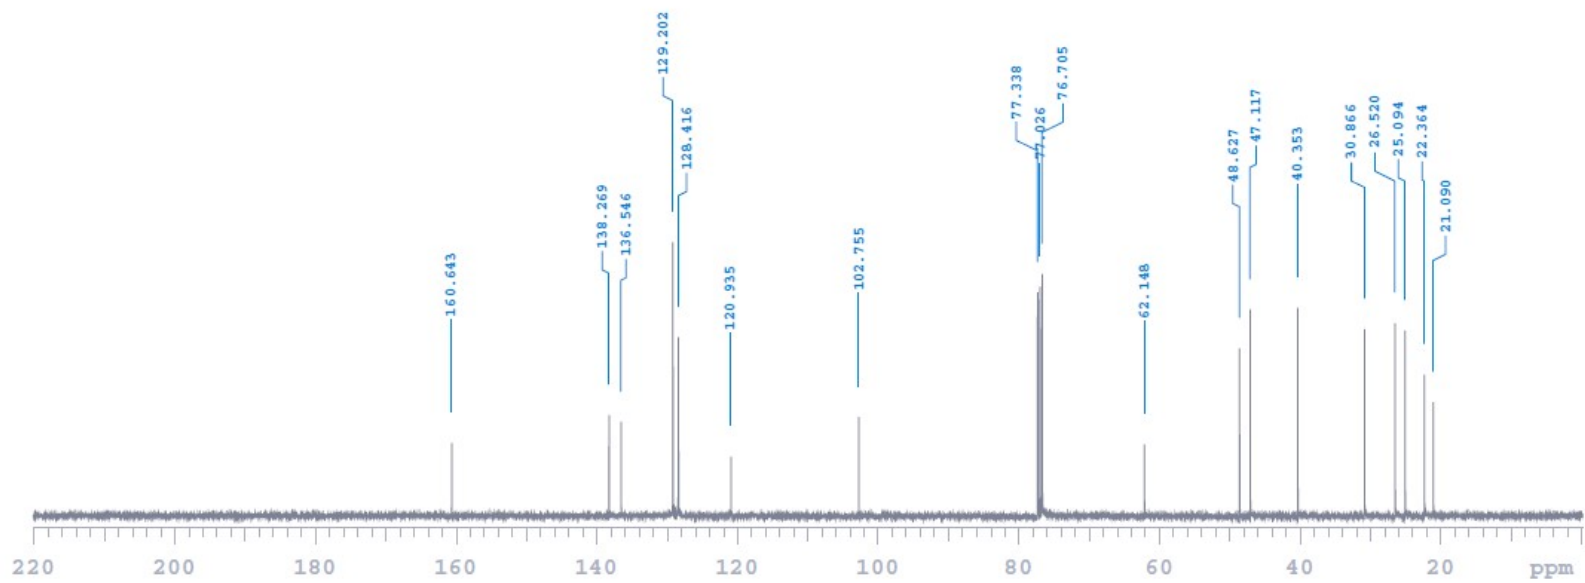

Fig. S67. <sup>13</sup>C-NMR spectrum of compound 4b.

Alaa-DA11 #719 RT: 2.48 AV: 1 NL: 1.49E6  
T: {0,0} + c EI Full ms [50.00-500.00]

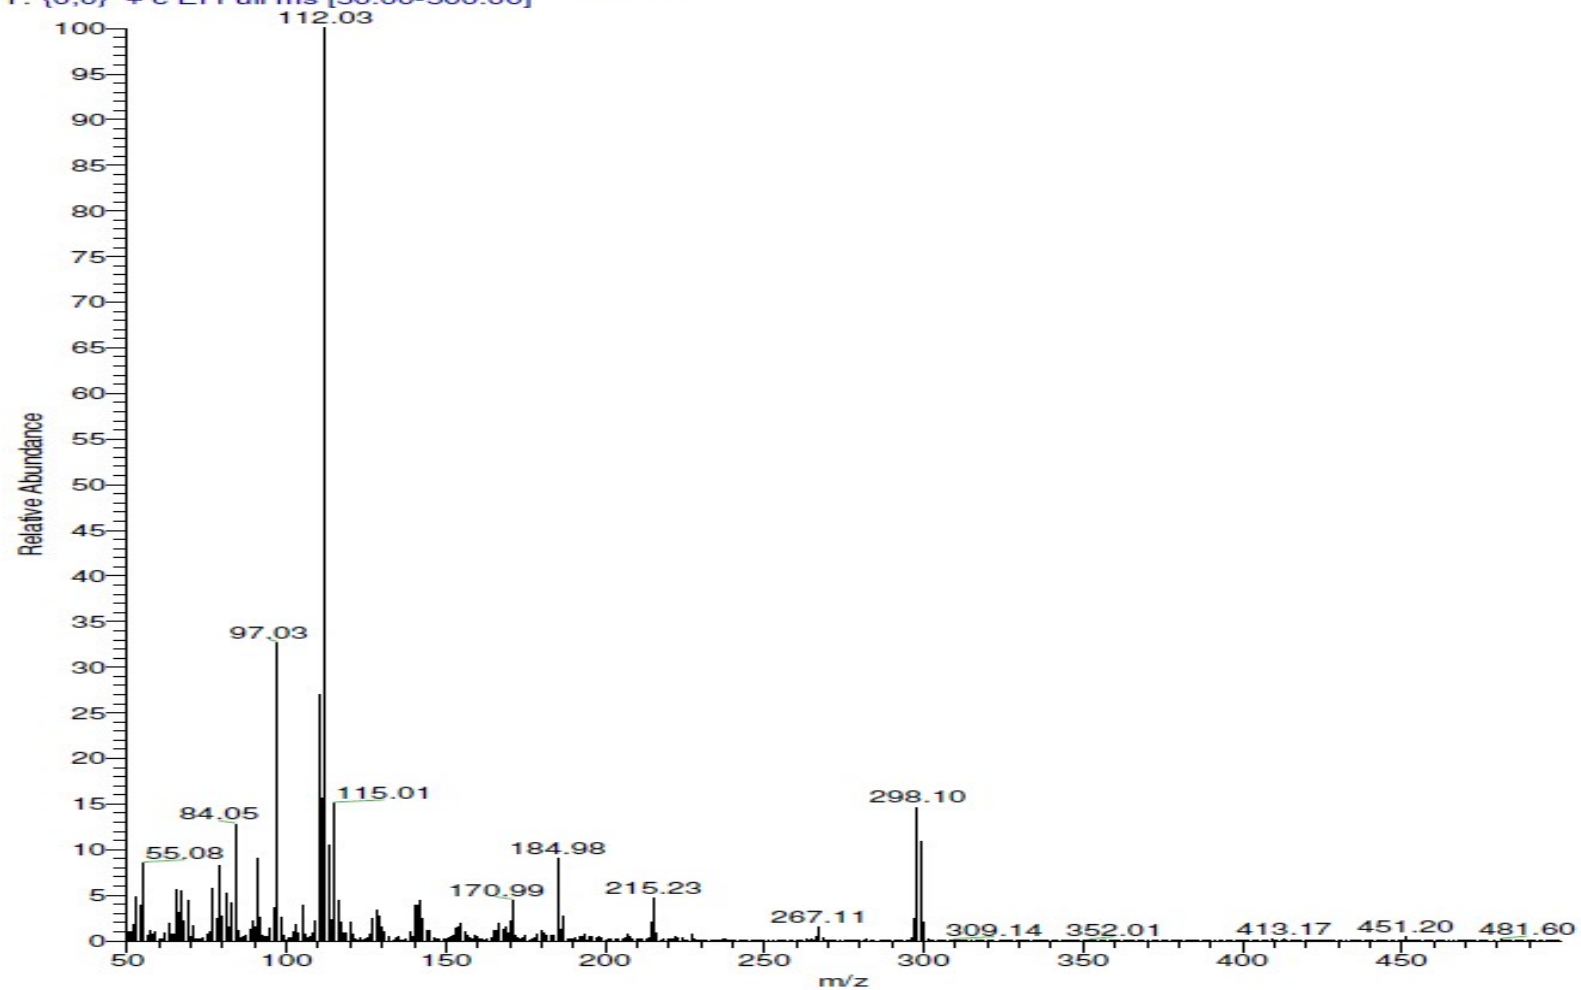

Fig. S68. Mass spectrum of compound 4b.



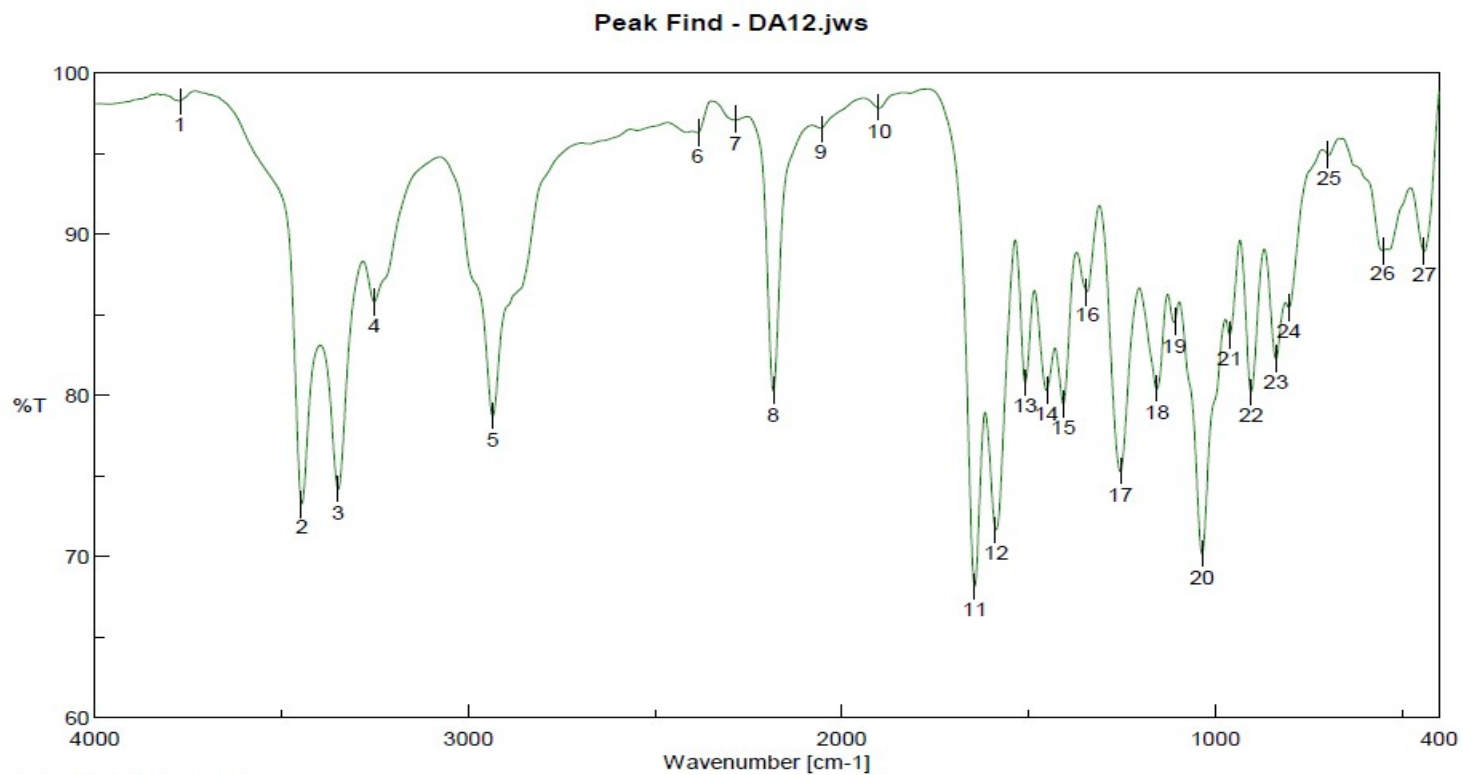

[ Result of Peak Picking ]

| No. | Position | Intensity |
|-----|----------|-----------|-----|----------|-----------|-----|----------|-----------|-----|----------|-----------|
| 1   | 3773.05  | 98.2361   | 2   | 3446.17  | 73.256    | 3   | 3348.78  | 74.1493   | 4   | 3252.36  | 85.7805   |
| 5   | 2935.13  | 78.6892   | 6   | 2386.48  | 96.2685   | 7   | 2285.23  | 97.058    | 8   | 2183.02  | 80.2346   |
| 9   | 2056.71  | 96.5515   | 10  | 1899.54  | 97.7939   | 11  | 1644.02  | 68.1237   | 12  | 1587.13  | 71.6381   |
| 13  | 1509.03  | 80.7791   | 14  | 1452.14  | 80.2817   | 15  | 1406.82  | 79.4432   | 16  | 1343.18  | 86.4173   |
| 17  | 1254.47  | 75.2463   | 18  | 1156.12  | 80.3586   | 19  | 1109.83  | 84.4893   | 20  | 1034.62  | 70.1172   |
| 21  | 961.341  | 83.7293   | 22  | 903.487  | 80.1895   | 23  | 836.955  | 82.2213   | 24  | 802.242  | 85.4182   |
| 25  | 695.212  | 94.8828   | 26  | 551.542  | 88.9669   | 27  | 439.69   | 88.889    |     |          |           |

**Fig. S69.** IR spectrum of compound **4c** (KBr pellet).

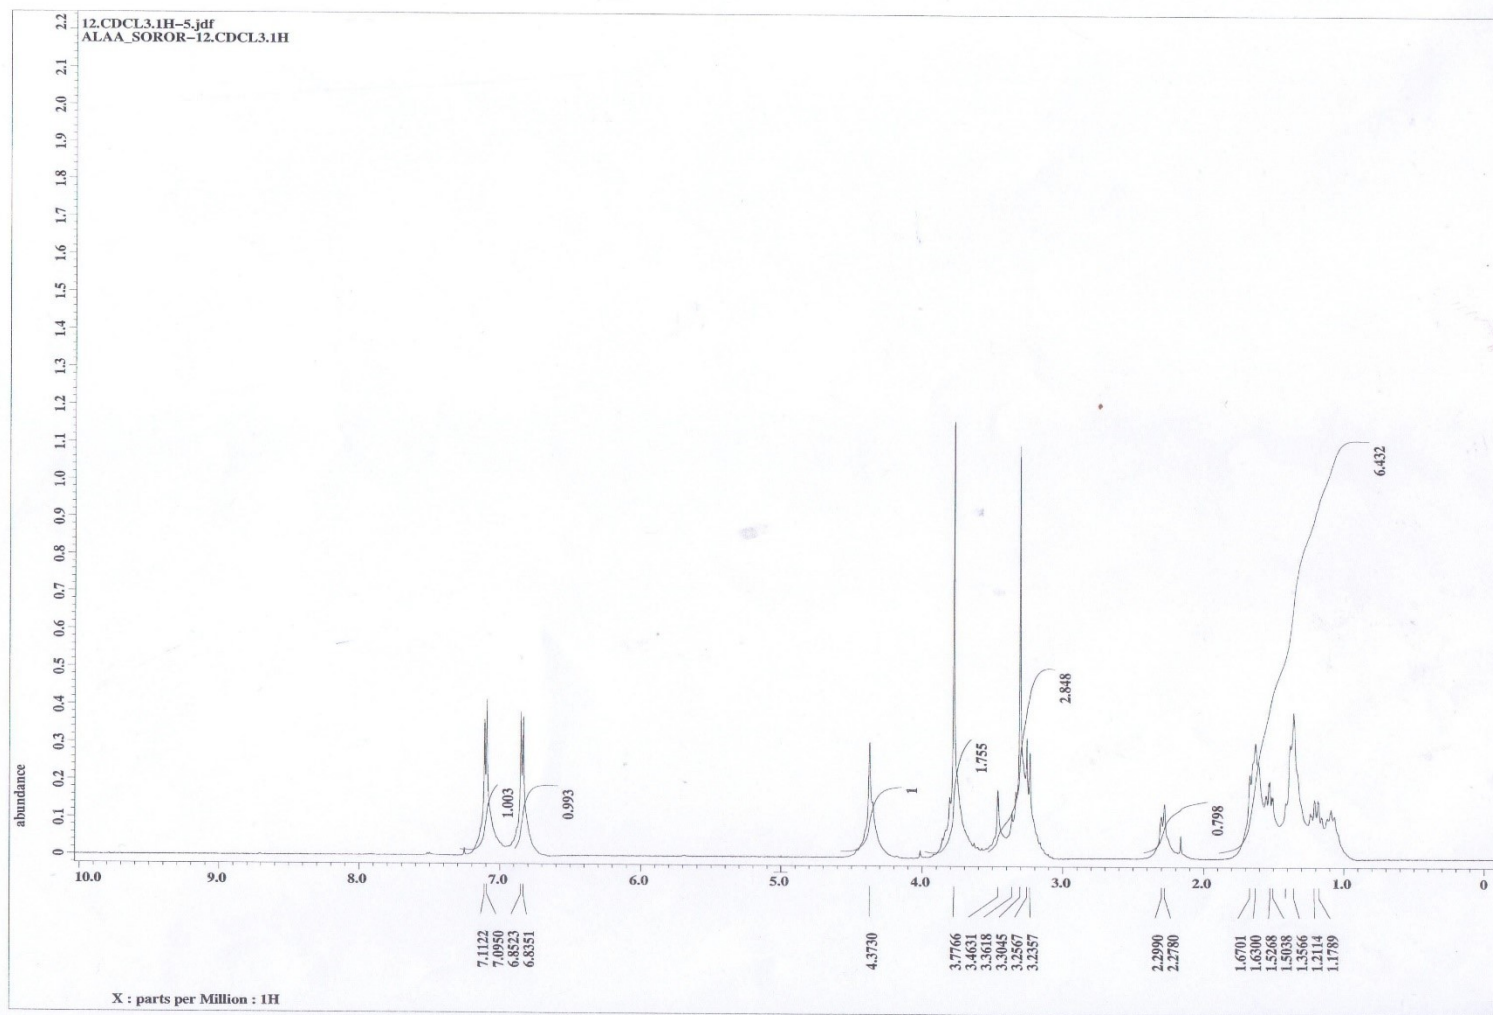

Fig. S70. <sup>1</sup>H-NMR spectrum of compound 4c.

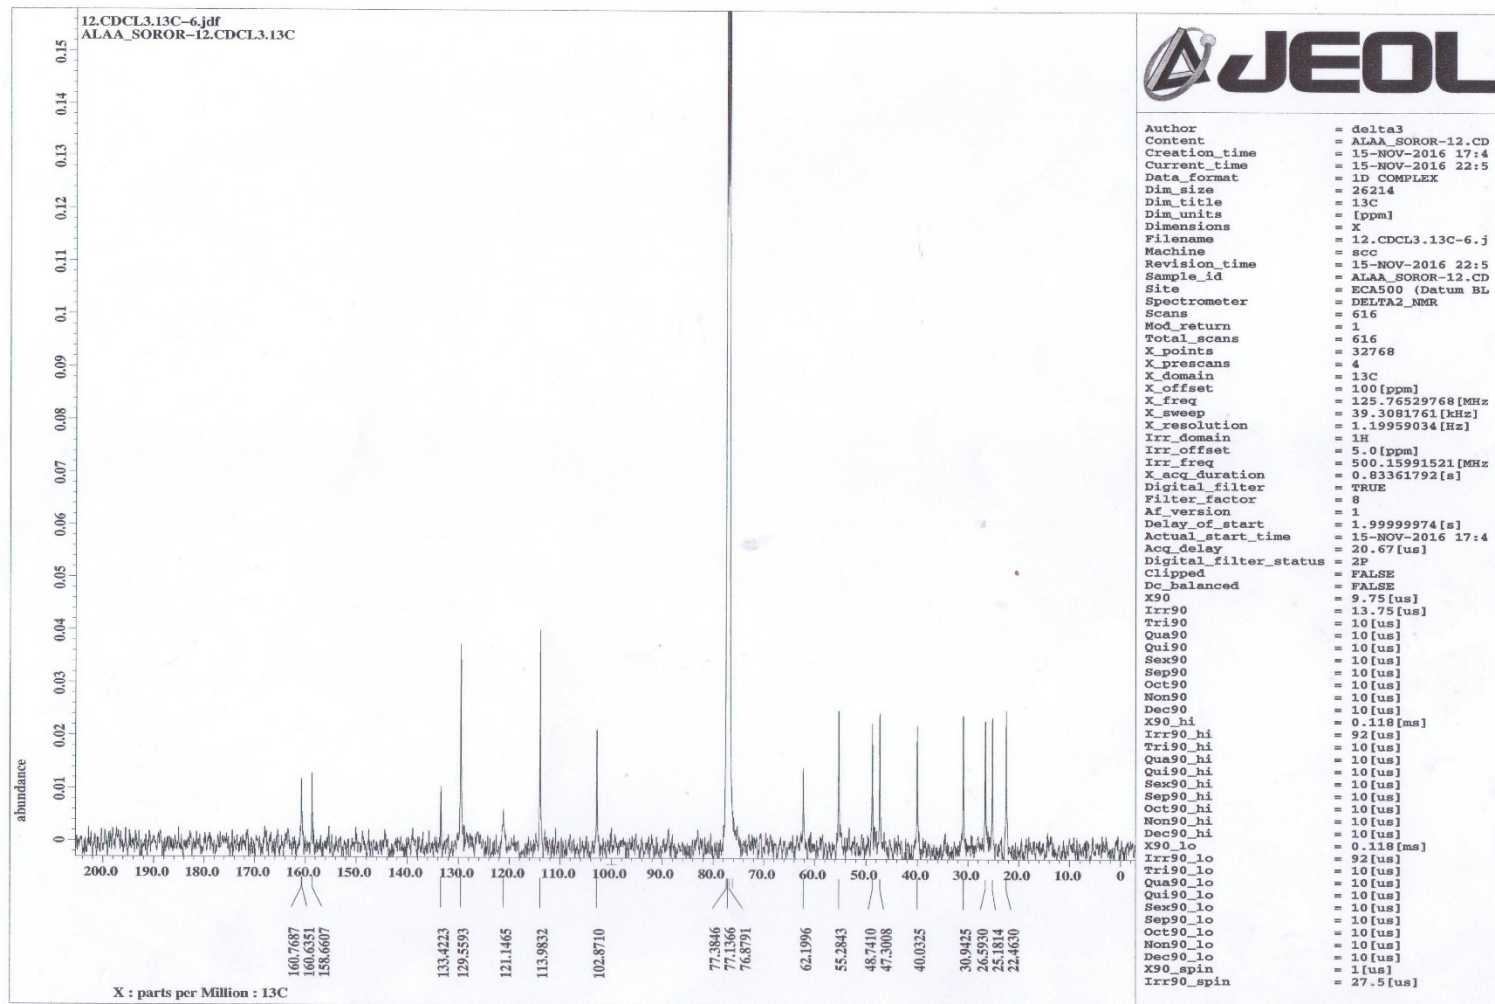

Fig. S71.  $^{13}\text{C}$ -NMR spectrum of compound **4c**.

Alaa-DA12 #539 RT: 1.86 AV: 1 NL: 1.01E7  
T: {0,0} + c EI Full ms [50.00-500.00]

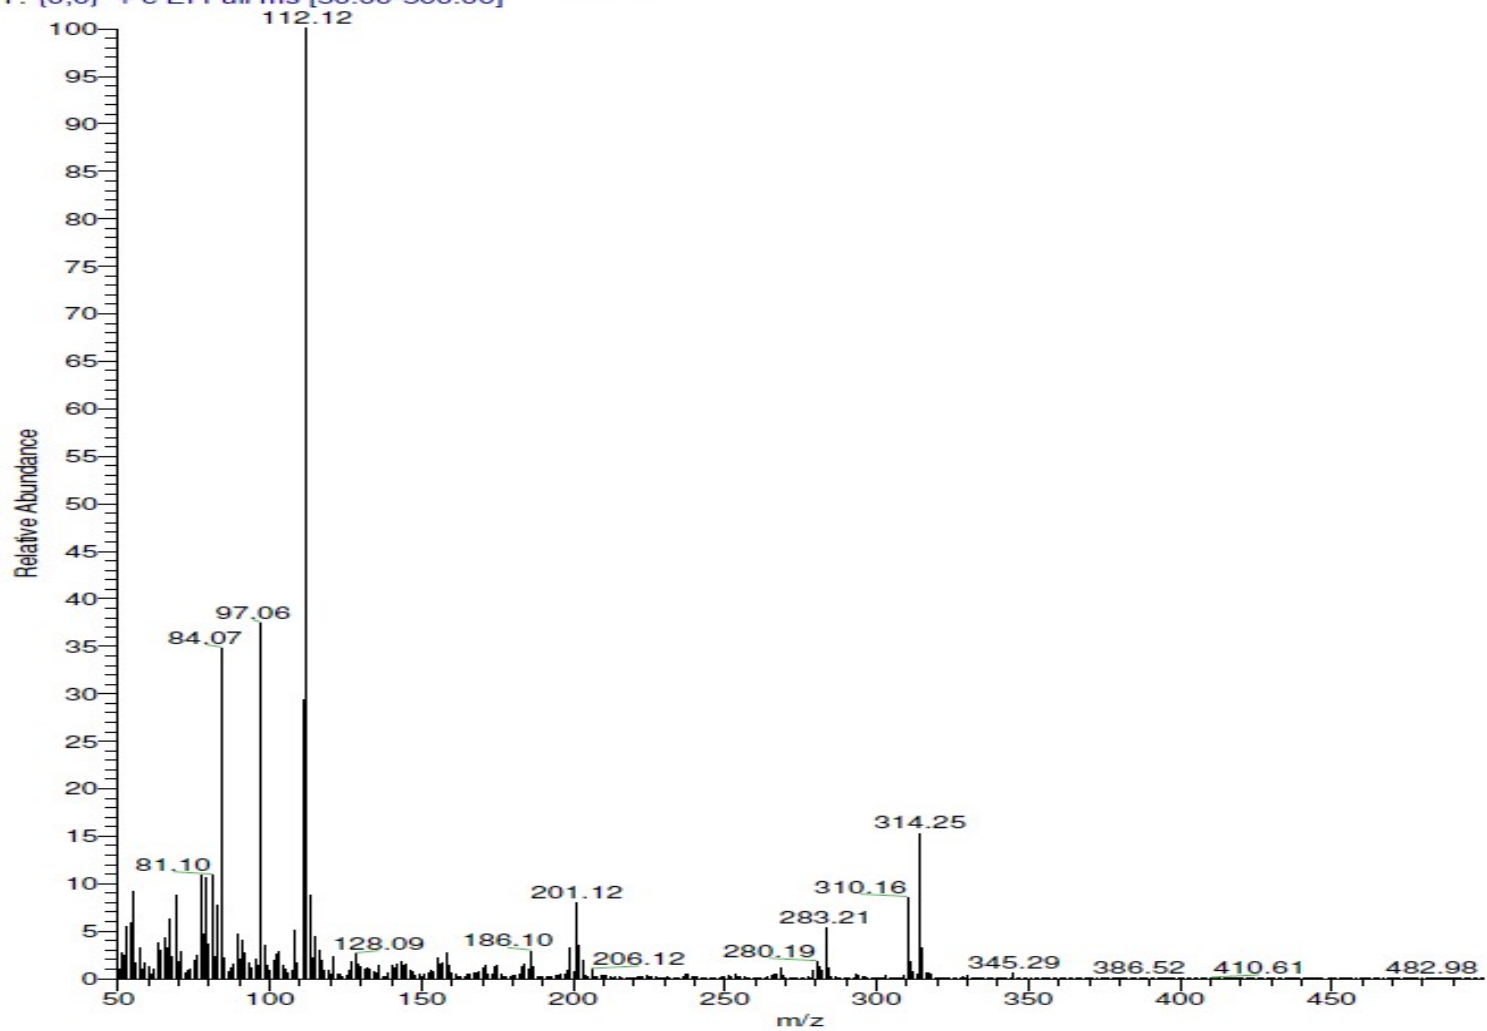

Fig. S72. Mass spectrum of compound 4c.

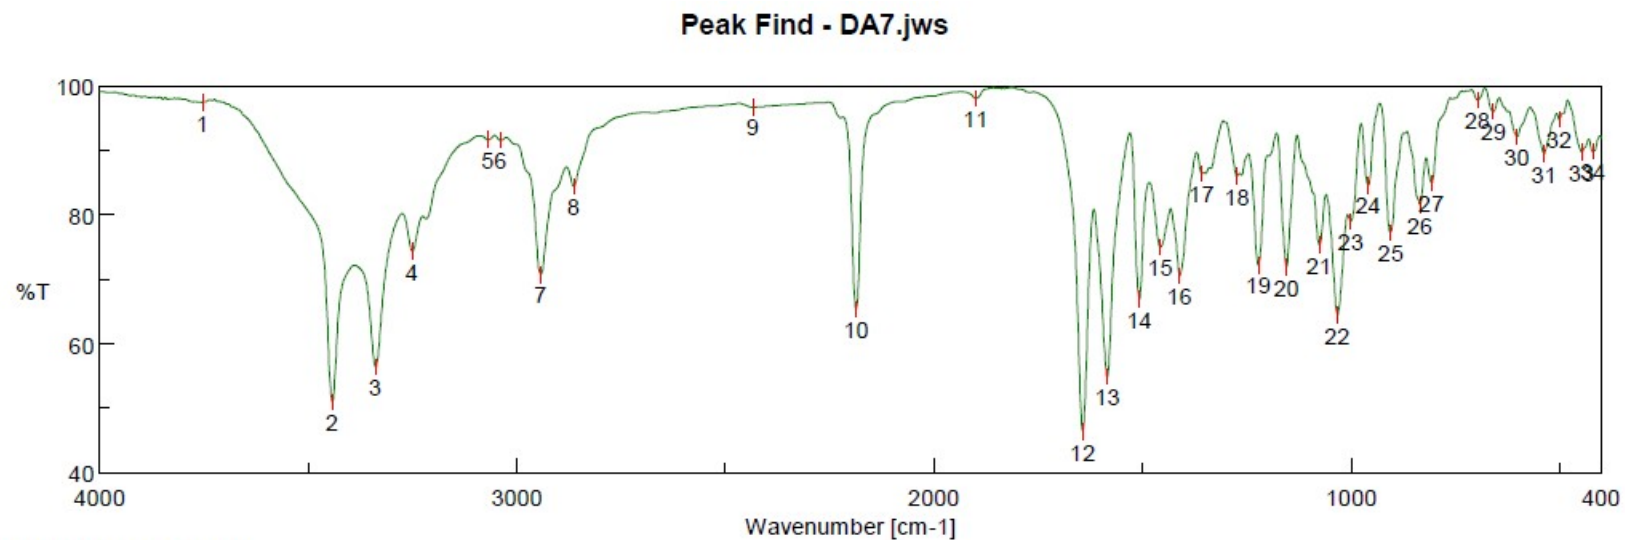

[ Result of Peak Picking ]

| No. | Position | Intensity |
|-----|----------|-----------|-----|----------|-----------|-----|----------|-----------|-----|----------|-----------|
| 1   | 3753.76  | 97.3842   | 2   | 3442.31  | 50.989    | 3   | 3338.18  | 56.3791   | 4   | 3250.43  | 74.3288   |
| 5   | 3069.16  | 91.6051   | 6   | 3038.3   | 91.5202   | 7   | 2942.84  | 70.7409   | 8   | 2863.77  | 84.3654   |
| 9   | 2433.73  | 96.6704   | 10  | 2186.88  | 65.3249   | 11  | 1899.54  | 98.0079   | 12  | 1644.02  | 46.3515   |
| 13  | 1584.24  | 54.8659   | 14  | 1507.1   | 66.9234   | 15  | 1456.96  | 74.965    | 16  | 1410.67  | 70.5228   |
| 17  | 1358.6   | 86.3548   | 18  | 1273.75  | 85.9462   | 19  | 1222.65  | 72.1927   | 20  | 1154.19  | 71.8595   |
| 21  | 1076.08  | 75.3517   | 22  | 1032.69  | 64.4342   | 23  | 1000.87  | 78.9852   | 24  | 958.448  | 84.6174   |
| 25  | 905.415  | 77.2752   | 26  | 835.026  | 81.5303   | 27  | 807.063  | 84.952    | 28  | 697.141  | 97.786    |
| 29  | 659.536  | 95.9883   | 30  | 601.682  | 92.1171   | 31  | 537.078  | 89.441    | 32  | 501.401  | 94.7629   |
| 33  | 447.404  | 89.7041   | 34  | 420.406  | 89.7728   |     |          |           |     |          |           |

**Fig. S73.** IR spectrum of compound **4d** (KBr pellet).

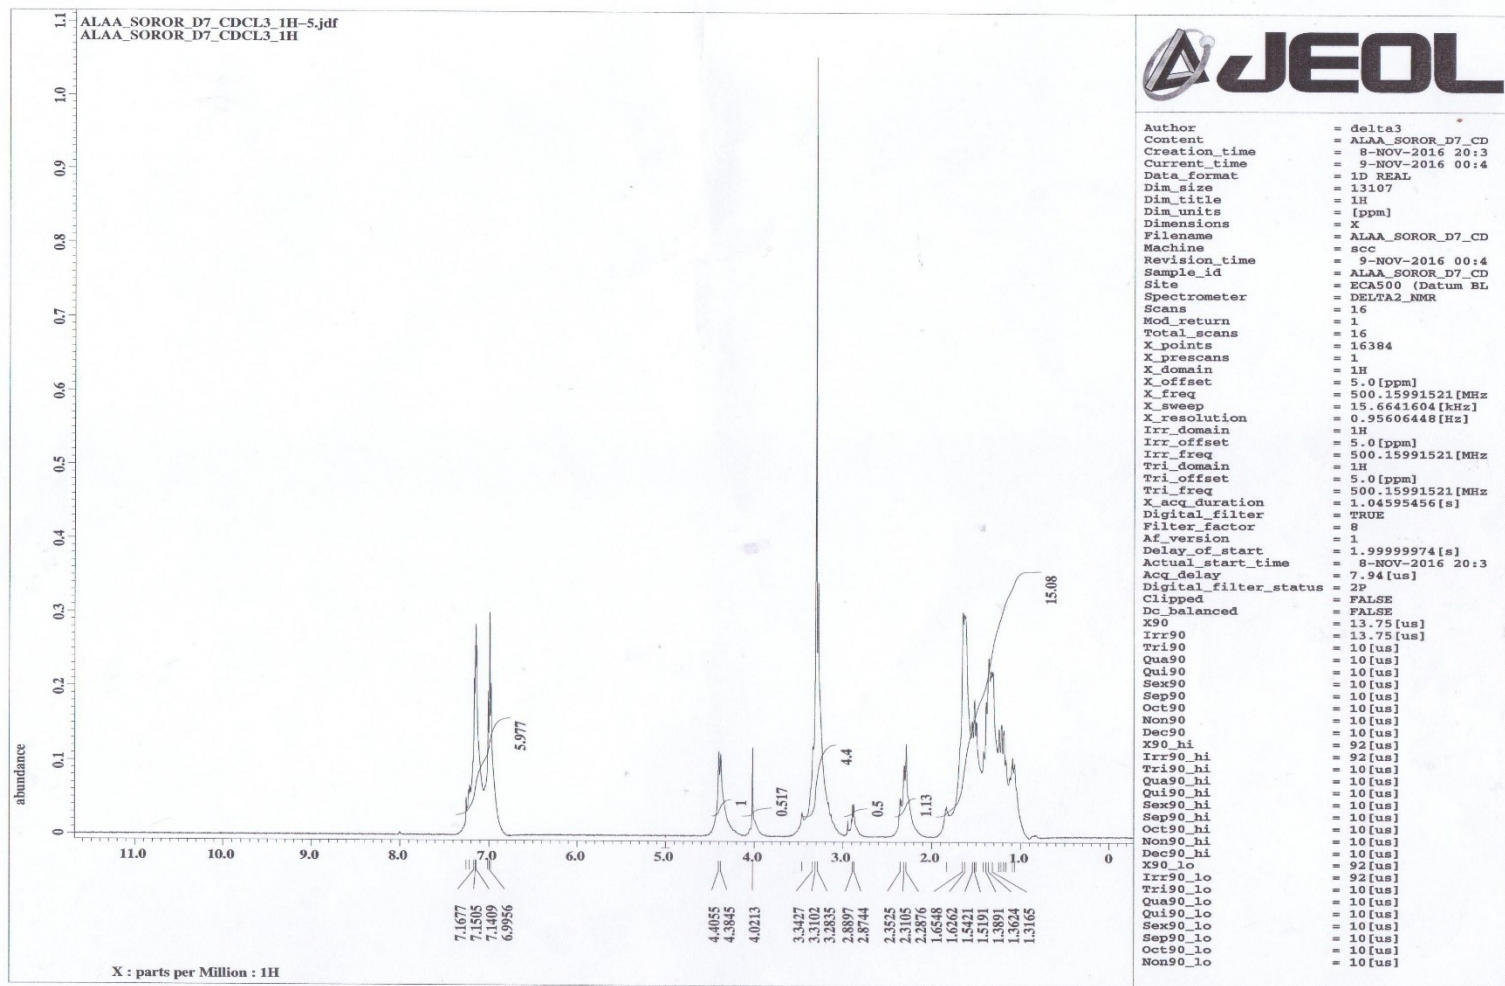

Fig. S74. <sup>1</sup>H-NMR spectrum of compound 4d.

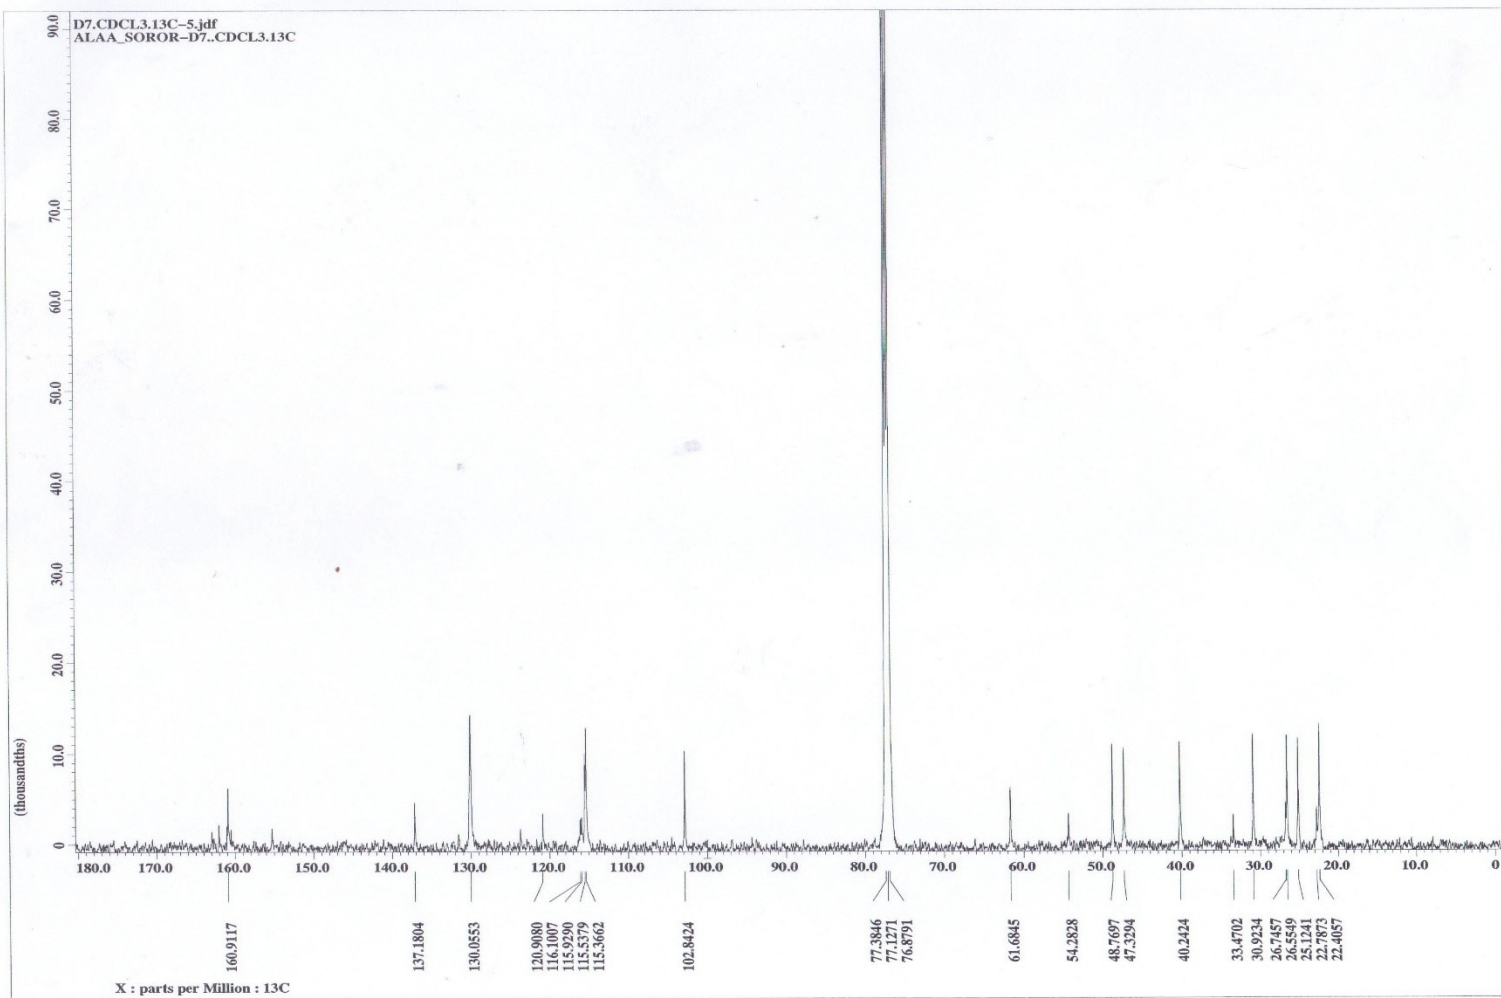

**Fig. S75.**  $^{13}\text{C}$ -NMR spectrum of compound **4d**.

Alaa-DA7 #715 RT: 2.46 AV: 1 NL: 3.09E6  
T: {0,0} + c EI Full ms [50.00-500.00]

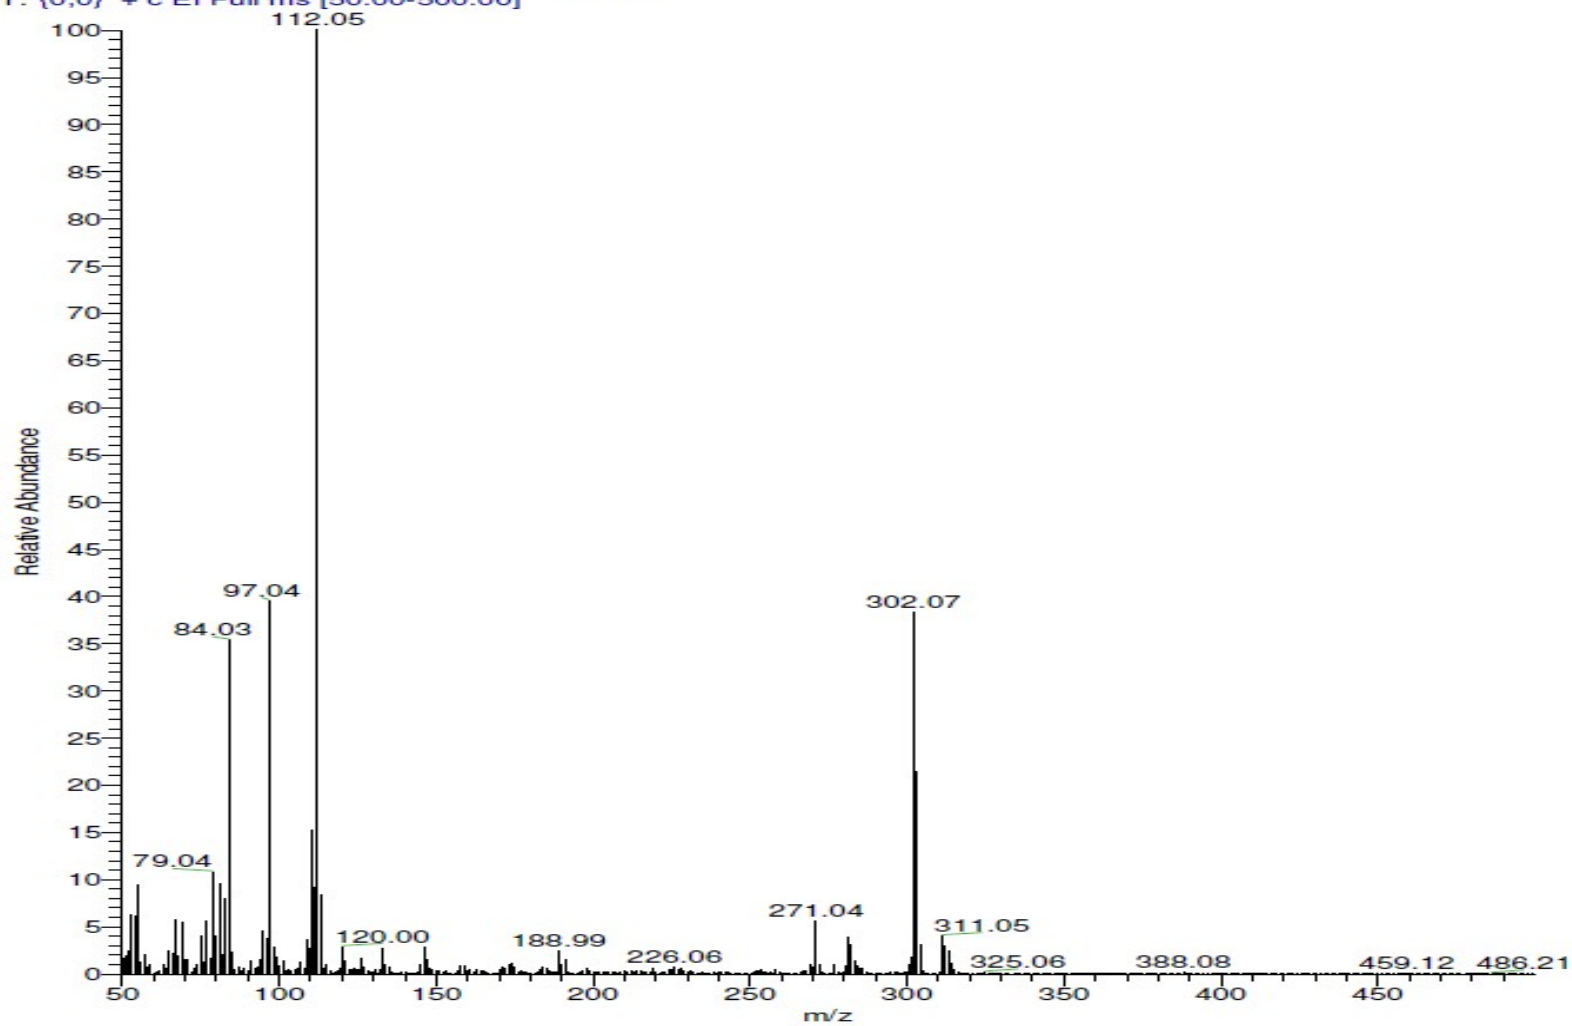

Fig. S76. Mass spectrum of compound 4d.



Peak Find - DA16.jws

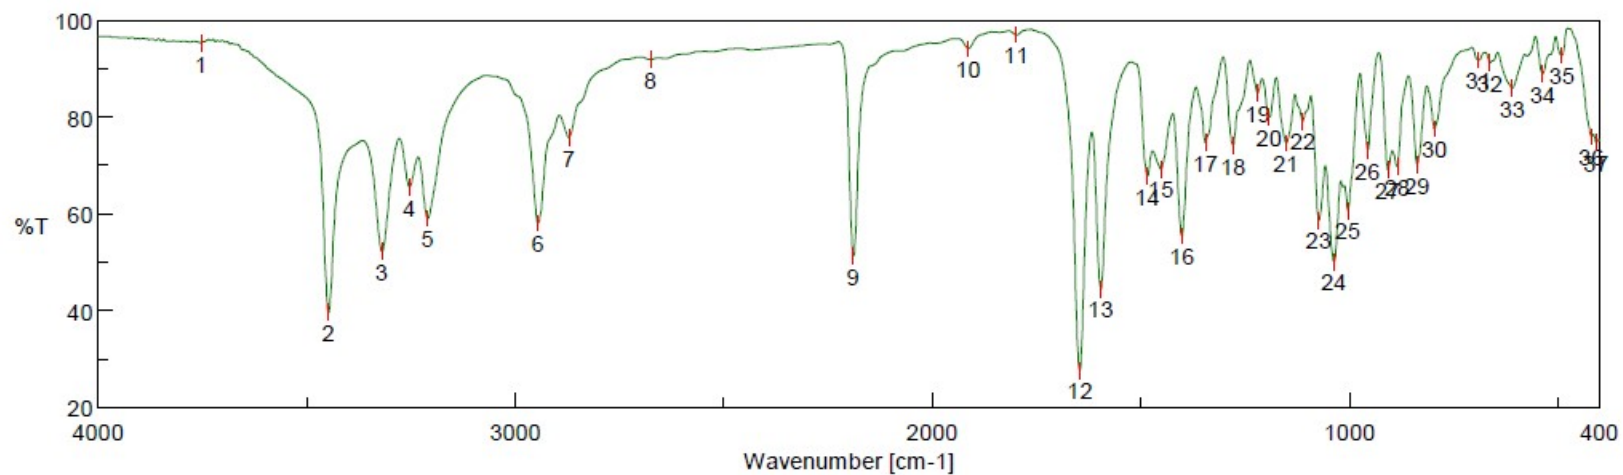

[ Result of Peak Picking ]

| No. | Position | Intensity |
|-----|----------|-----------|-----|----------|-----------|-----|----------|-----------|-----|----------|-----------|
| 1   | 3753.76  | 95.2633   | 2   | 3448.1   | 39.6083   | 3   | 3319.86  | 52.1672   | 4   | 3253.32  | 65.5215   |
| 5   | 3209.93  | 58.9237   | 6   | 2945.73  | 58.0336   | 7   | 2871.49  | 75.726    | 8   | 2675.75  | 91.9164   |
| 9   | 2188.81  | 51.2432   | 10  | 1913.04  | 94.1455   | 11  | 1798.3   | 96.9494   | 12  | 1645.95  | 27.5204   |
| 13  | 1595.81  | 44.3579   | 14  | 1483.96  | 67.7793   | 15  | 1452.14  | 69.1581   | 16  | 1402     | 55.4149   |
| 17  | 1345.11  | 74.7185   | 18  | 1278.57  | 74.0667   | 19  | 1219.76  | 84.9991   | 20  | 1191.79  | 79.9716   |
| 21  | 1151.29  | 74.5874   | 22  | 1111.76  | 79.0627   | 23  | 1073.19  | 58.6047   | 24  | 1036.55  | 49.9891   |
| 25  | 1002.8   | 60.5719   | 26  | 955.555  | 73.0408   | 27  | 907.344  | 69.0725   | 28  | 885.166  | 69.7611   |
| 29  | 837.919  | 70.1178   | 30  | 795.493  | 77.5145   | 31  | 689.427  | 91.7541   | 32  | 662.428  | 91.1311   |
| 33  | 609.396  | 85.9427   | 34  | 536.114  | 88.966    | 35  | 490.795  | 92.7079   | 36  | 419.442  | 75.9275   |
| 37  | 407.871  | 74.7009   |     |          |           |     |          |           |     |          |           |

Fig. S77. IR spectrum of compound 4e (KBr pellet).

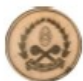

Dr\_ZaneebNovel-16

Dr\_ZaneebNovel-16

Sample Name Dr\_ZaneebNovel-16  
Date collected 2017-04-27

Pulse sequence PROTON  
Solvent cdcl3

Temperature 25  
Spectrometer nmr400-mercury400

Study owner vnmr1  
Operator vnmr1

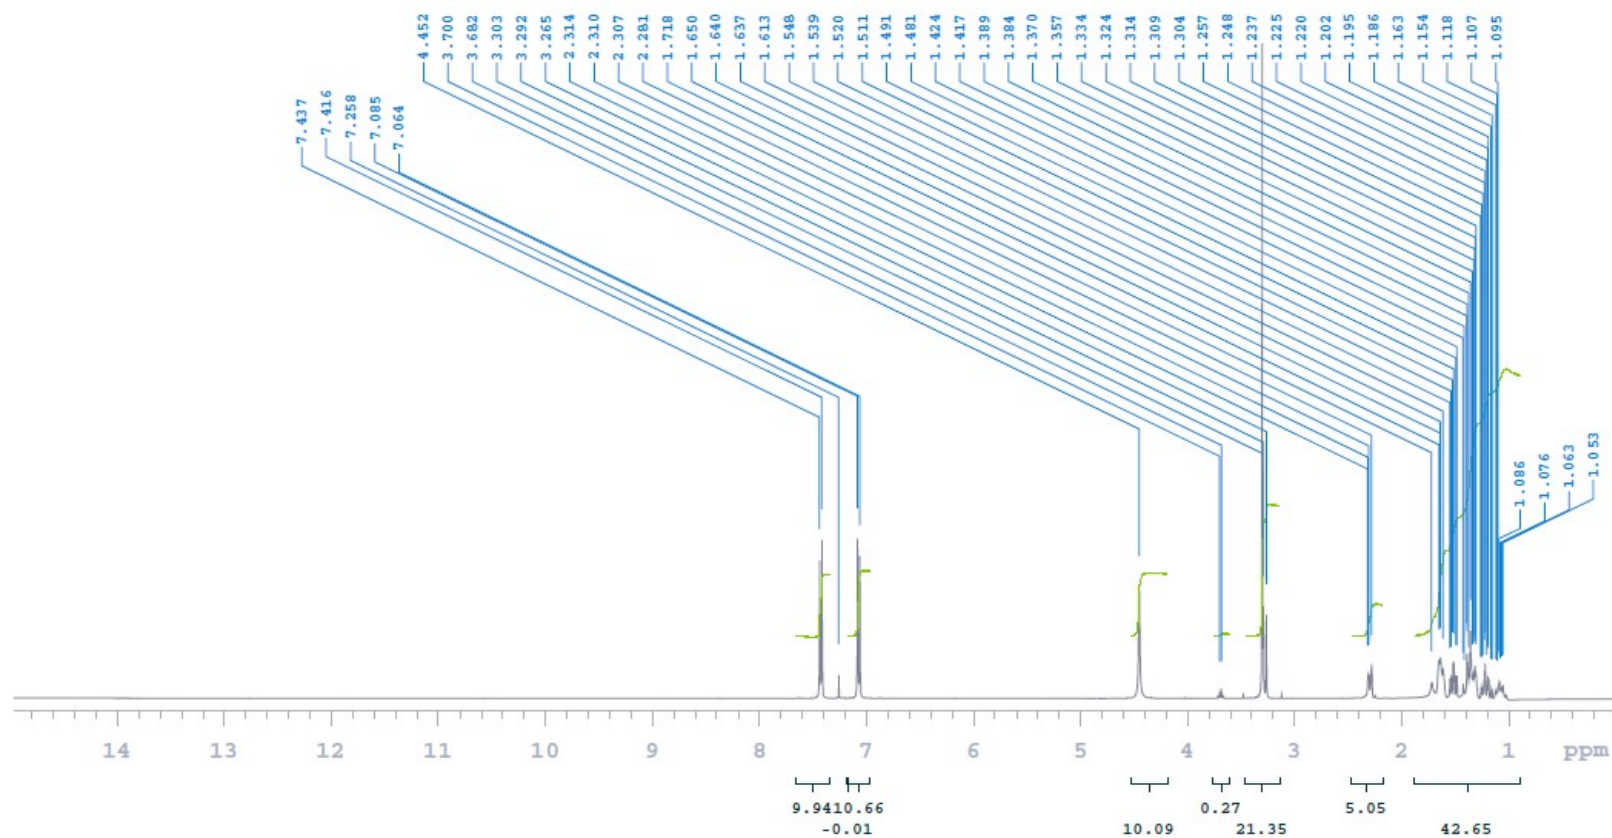

Fig. S78.  $^1\text{H}$ -NMR spectrum of compound 4e.

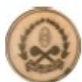

Dr\_ZaneebNovel-DA16

Dr\_ZaneebNovel-DA16

Sample Name Dr\_ZaneebNovel-DA16  
Date collected 2017-08-02

Pulse sequence CARBON  
Solvent cdcl3

Temperature 25  
Spectrometer nmr400-mercury400

Study owner vnmr1  
Operator vnmr1

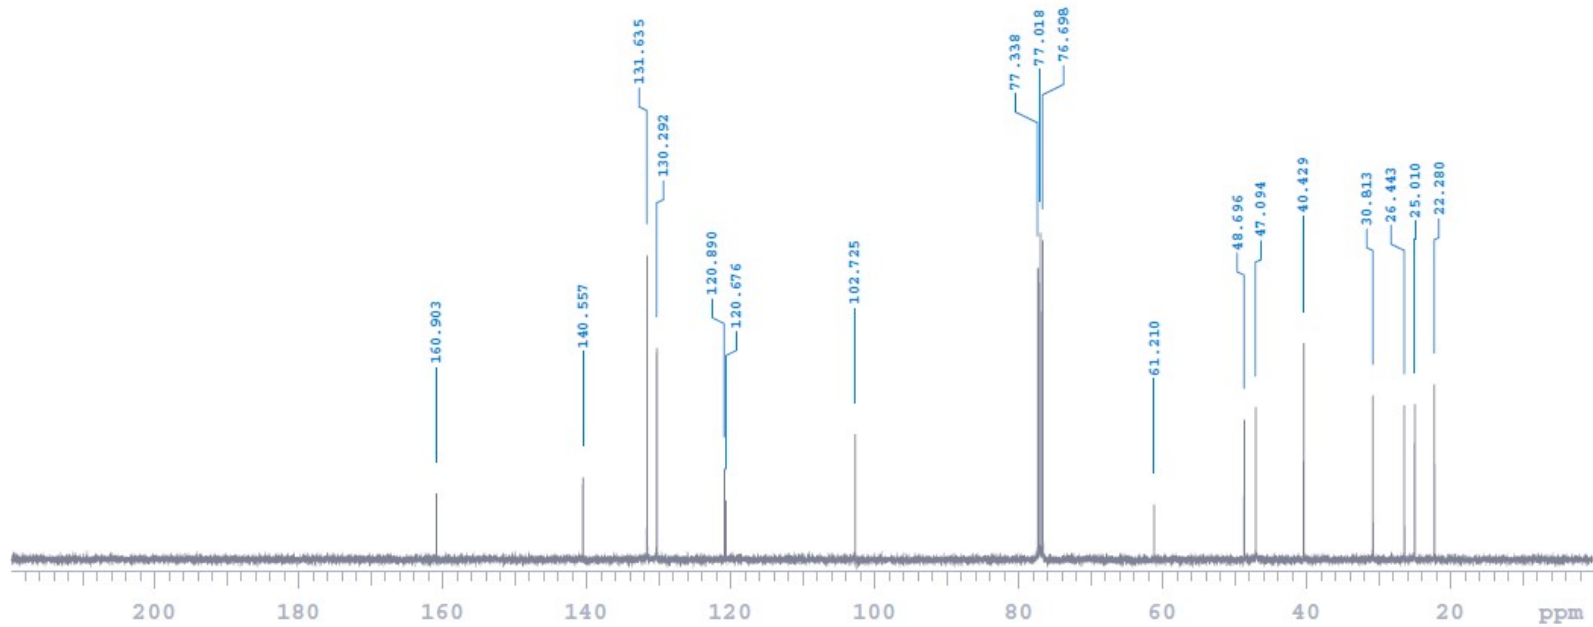

Fig. S79.  $^{13}\text{C}$ -NMR spectrum of compound **4e**.

- [1] A.S. Girgis, A. Kalmouch, M. Ellithey, Synthesis of novel vasodilatory active nicotinate esters with amino acid function. *Bioorg. Med. Chem.* 14 (2006) 8488-8494.
- [2] Z.M. Nofal, A.M. Srour, W.I. El-Eraky, D.O. Saleh, A.S. Girgis. Rational design, synthesis and QSAR study of vasorelaxant active 3-pyridinecarbonitriles incorporating 1H-benzimidazol-2-yl function. *Eur. J. Med. Chem.* 63 (2013) 14-21.
- [3] A.M. Srour, S.S. Abd El-Karim, D.O. Saleh, W.I. El-Eraky, Z.M. Nofal, Rational design, synthesis and 2D-QSAR study of novel vasorelaxant active benzofuran-pyridine hybrids. *Bioorg. Med. Chem. Lett.* 26 (2016) 2557-2561.
- [4] N.M. Khalifa, A.M. Srour, S.S. AbdEl-Karim, D.O. Saleh, M. A. Al-Omar, Synthesis and 2D-QSAR Study of Active Benzofuran-Based Vasodilators, *Molecules*, 22 (2017) 1820.
- [5] M. R. Boyd, K.D. Paull, *Drug Rev. Res.* 1995, 34, 91–109.
- [6] B. S. El-Menshawi, W. Fayad, K. Mahmoud, S. M. El-Hallouty, M. El-Manawaty, M. H. Olofsson, *Indian J. Exp. Biol.* 2010, 48, 258–264.
- [7] M. I. Thabrew, R. D. Hughes, I. G. McFarlane, *J. Pharm. Pharmacol.* 1997, 49, 1132–1135.
